# Supplementary material for: Tumor DNA methylation profiles correlate with response to anti-PD-1 immune checkpoint inhibitor monotherapy in sarcoma patients
Source: PubMed Central journal article supplement — J Immunother Cancer. 2021 Mar 24;9(3):e001458. doi: 10.1136/jitc-2020-001458 (PMC7993298; doi:10.1136/jitc-2020-001458), 2021-03-24
Supplement: jitc-2020-001458supp001.pdf [file jitc-2020-001458supp001.pdf]

**Supplementary information to “Tumor DNA methylation profiles correlate with response to anti-PD-1 immune checkpoint inhibitor monotherapy in sarcoma patients” by Starzer et al.**

A.M. Starzer (1,2), A.S. Berghoff (1,2), R. Hamacher (3), E. Tomasich (1), K. Feldmann (1), T. Hatzioannou (1), S. Traint (1), W. Lamm (1), I.M. Noebauer-Huhmann (4), J. Furtner (4), L. Müllauer (5), G. Amann (5), S. Bauer (3), H.U. Schildhaus (6), M. Preusser (1,2), G. Heller\* (1) and T. Brodowicz\* (1)

\*equal contribution

1 Division of Oncology, Department of Medicine I, Medical University of Vienna, Vienna, Austria

2 Christian Doppler Laboratory for Personalized Immunotherapy, Department of Medicine I, Medical University of Vienna

3 Department of Medical Oncology, Sarcoma Center, West German Cancer Center, University Hospital Essen, University of Duisburg-Essen, Duisburg, Germany

4 Department of Biomedical Imaging and Image-guided Therapy, Division of General and Paediatric Radiology, Medical University of Vienna, Vienna, Austria

5 Department of Pathology, Medical University of Vienna, Vienna, Austria

6 Institute of Pathology, University Hospital Essen, Essen, Germany

**Running title:** Methylation correlates with response to anti-PD-1 ICI in sarcoma patients

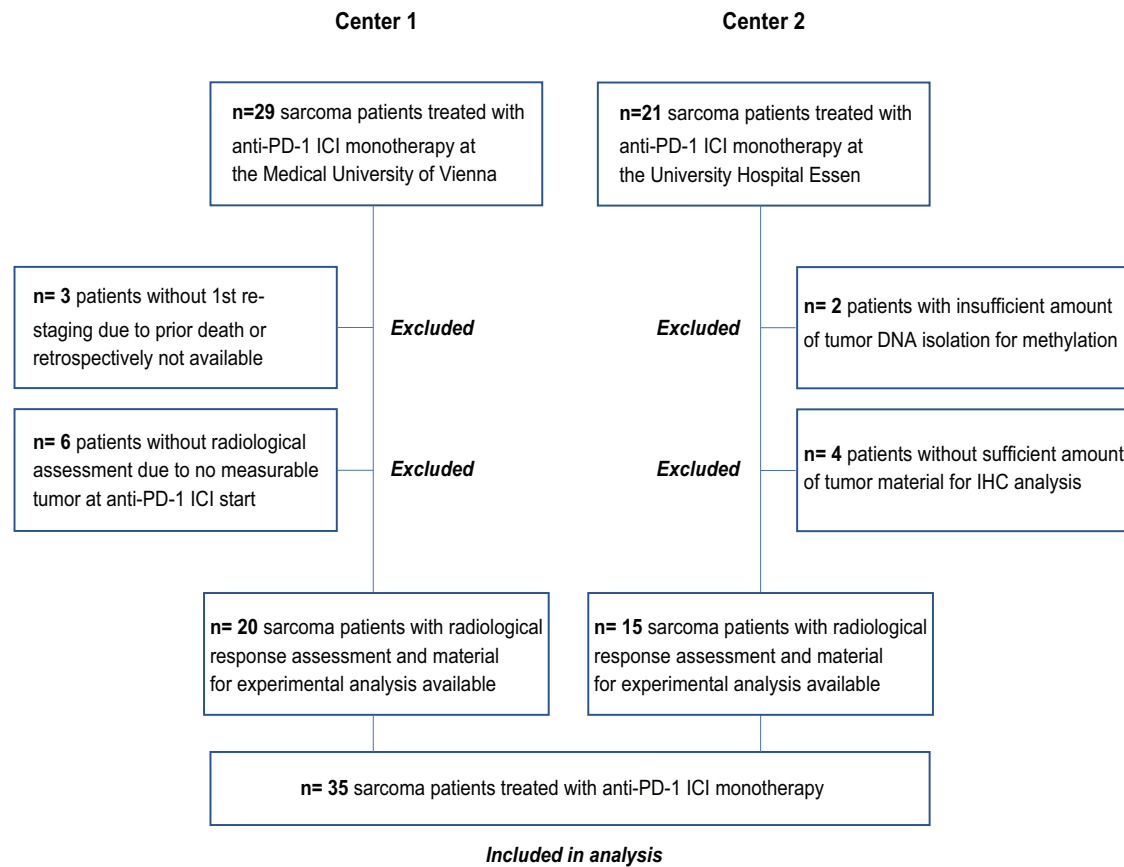

**Supplementary Figure S1.** Consort diagram of patient allocation

**A Immune cell density**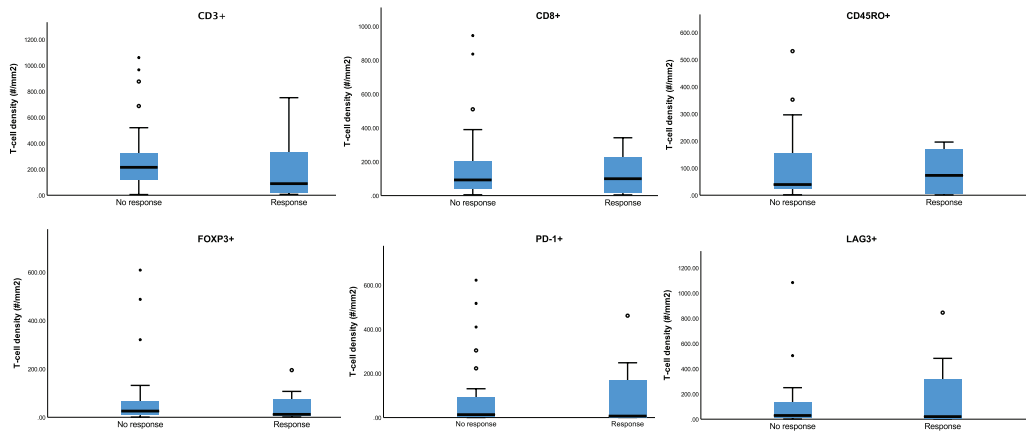**B Systemic inflammation scores**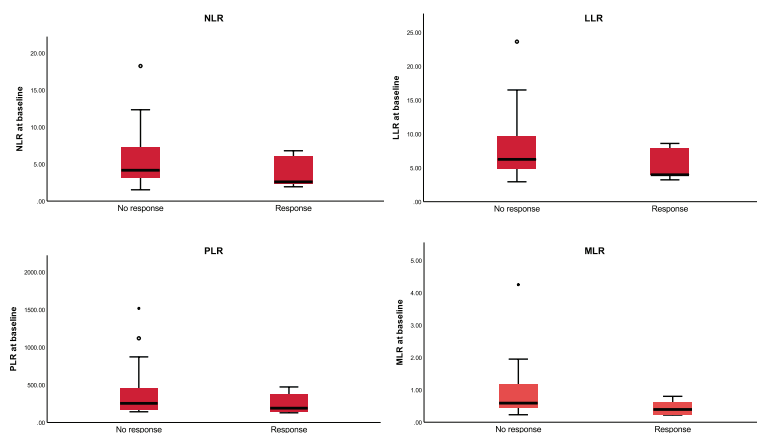

**Supplementary Figure S2. A** Median immune cell density and **B** systemic inflammation scores according to response or no response to anti-PD-1 ICI therapy. NLR, neutrophil-to-lymphocyte ratio; LLR, leucocyte-to-lymphocyte ratio; MLR, monocyte-to-lymphocyte ratio; PLR, platelet-to-lymphocyte ratio

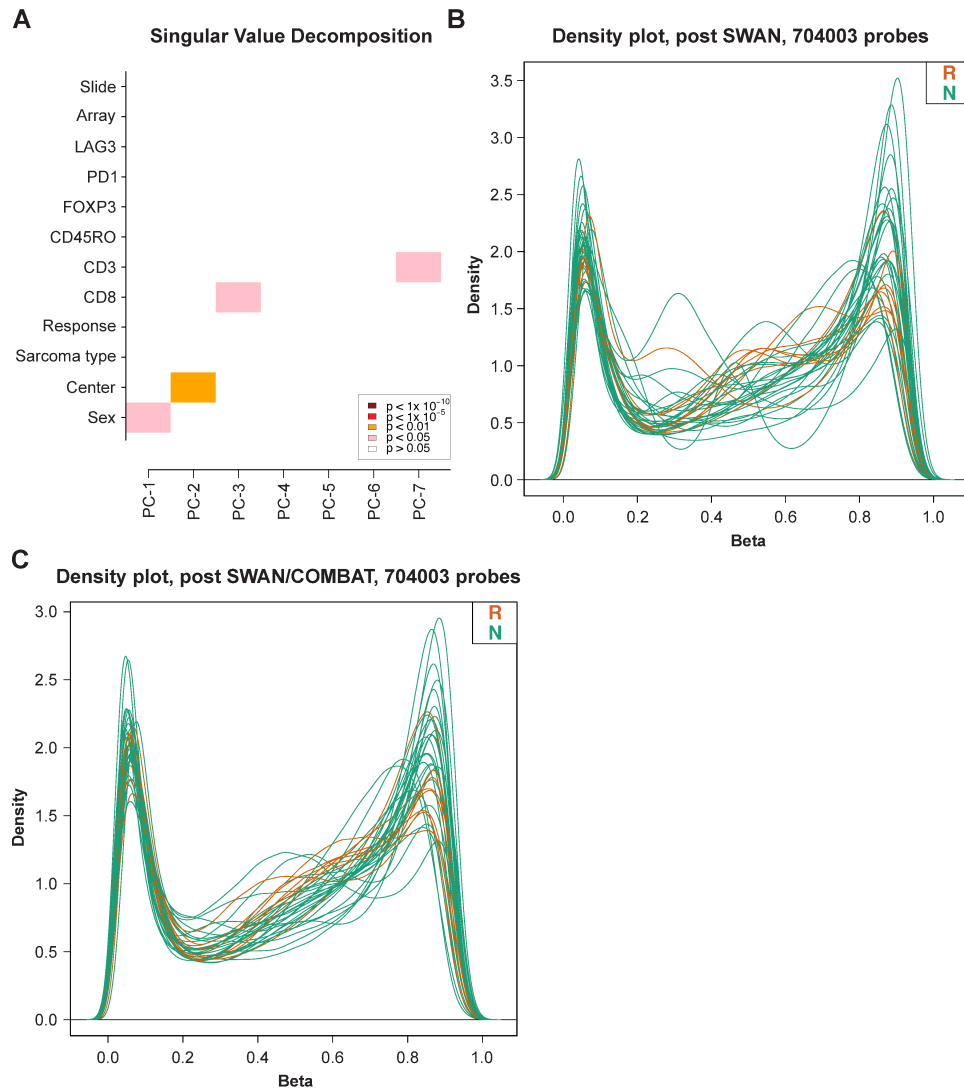

**Supplementary Figure S3. (A)** Singular Value Decomposition plot showing the influence of immune cell infiltration, center and sex on methylation of the study cohort of 35 sarcoma patients. Pink and orange boxes indicate statistical significance ( $P < 0.05$  and  $p < 0.01$ , respectively). **(B)** Density plot of SWAN normalized beta values of 8 responders (R) and 27 non-responders (NR) to anti-PD-1 ICI before and **(C)** after adjustment.

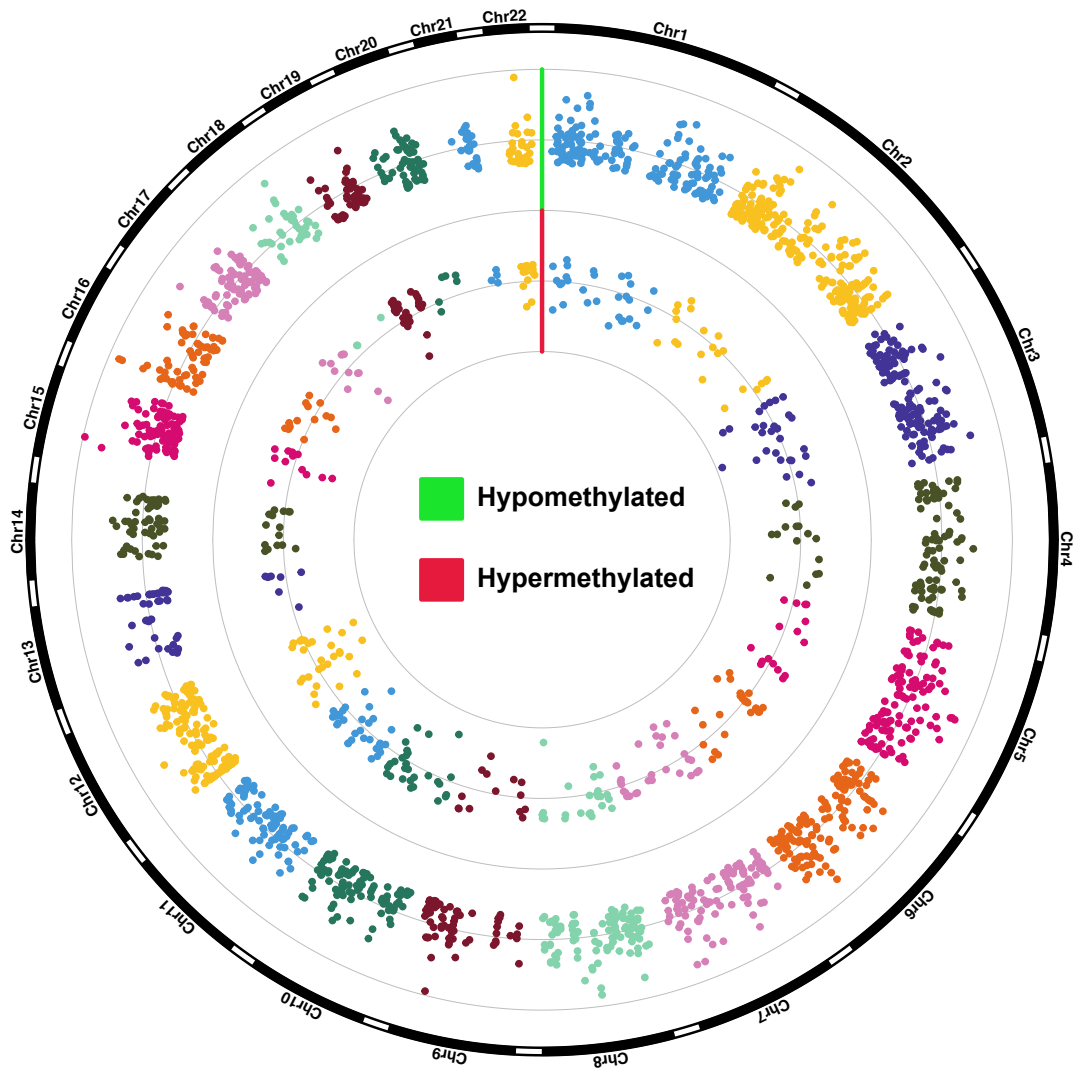

**Supplementary Figure S4.** Circular Manhattan plot showing chromosomal distributions of 2,043 hypomethylated (green; outer circle) and 410 hypermethylated (red; inner circle) DMPs between responders and non-responders to anti-PD-1 ICI.

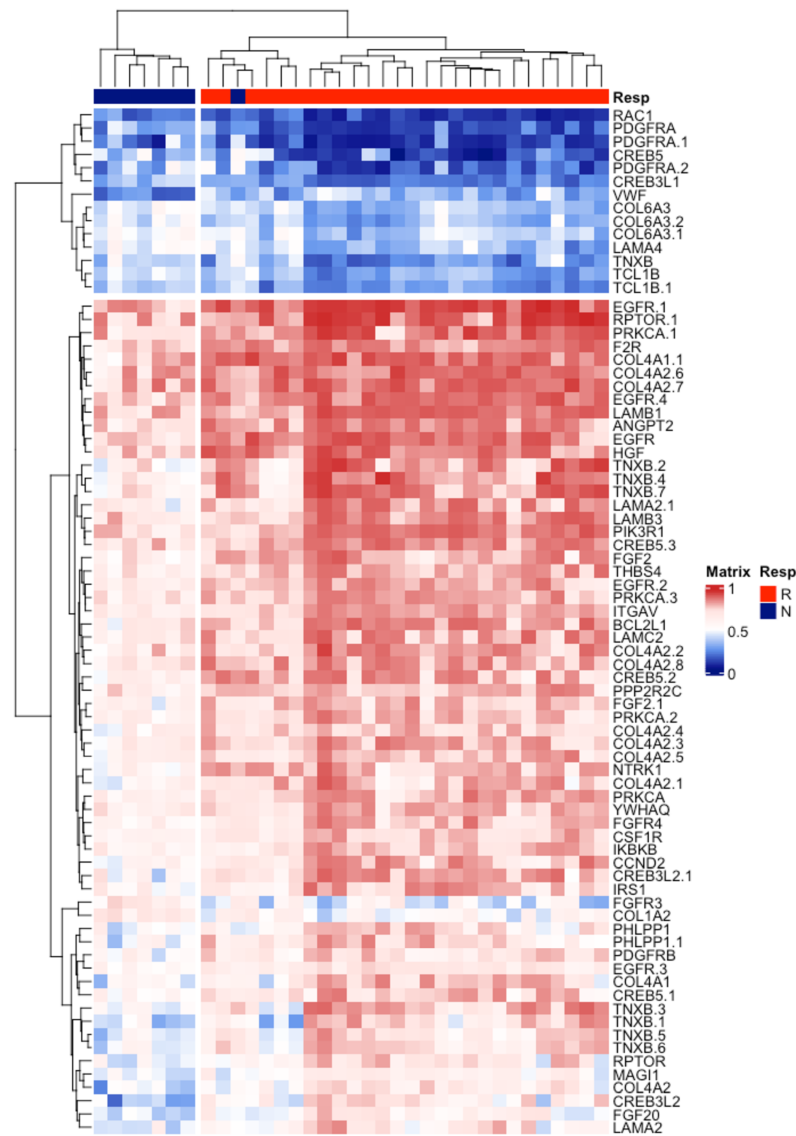

**Supplementary Figure S5.** Heatmap summarizing methylation of DMPs associated with PI3K/AKT signaling in 35 primary sarcoma samples (red, non-responder; blue, responder). Rows represent CpG sites and columns represent patient samples. Heatmap colors reflect beta values representing the degree of methylation from low (blue) to high (red). No centering/scaling of beta values was performed.

## Non-responder to anti-PD1 ICI therapy

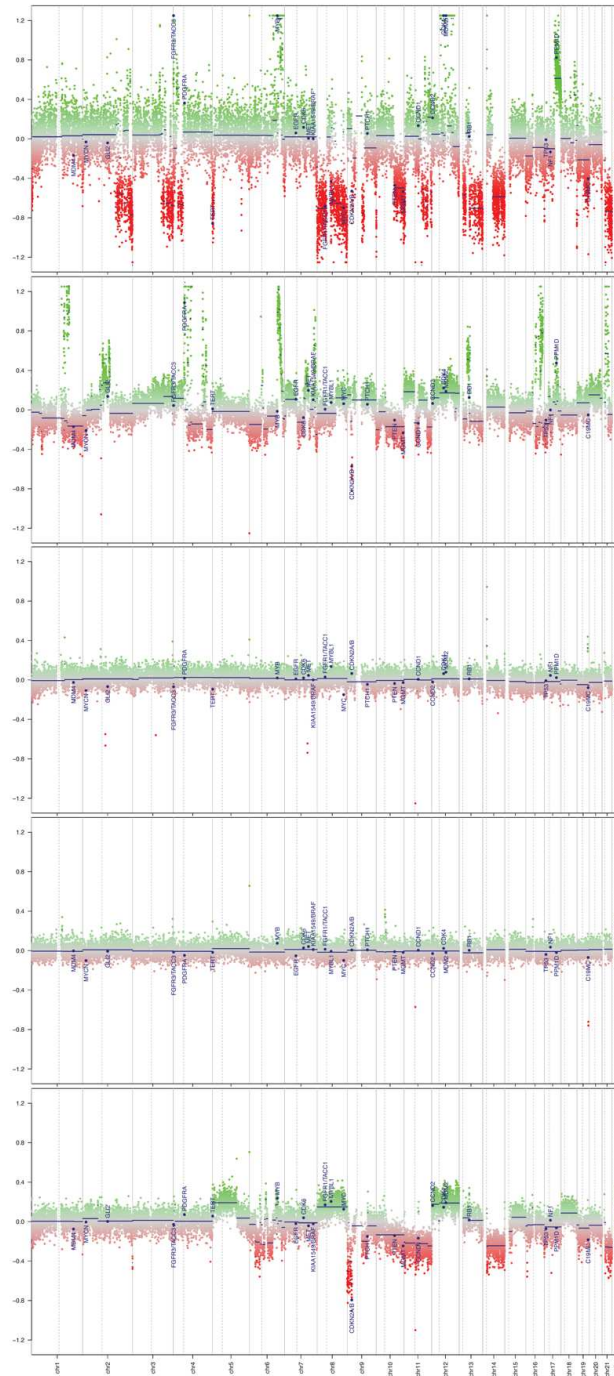

**Supplementary Figure S6.** Copy number variations in 5 sarcoma patients non-responding to anti-PD-1 ICI.

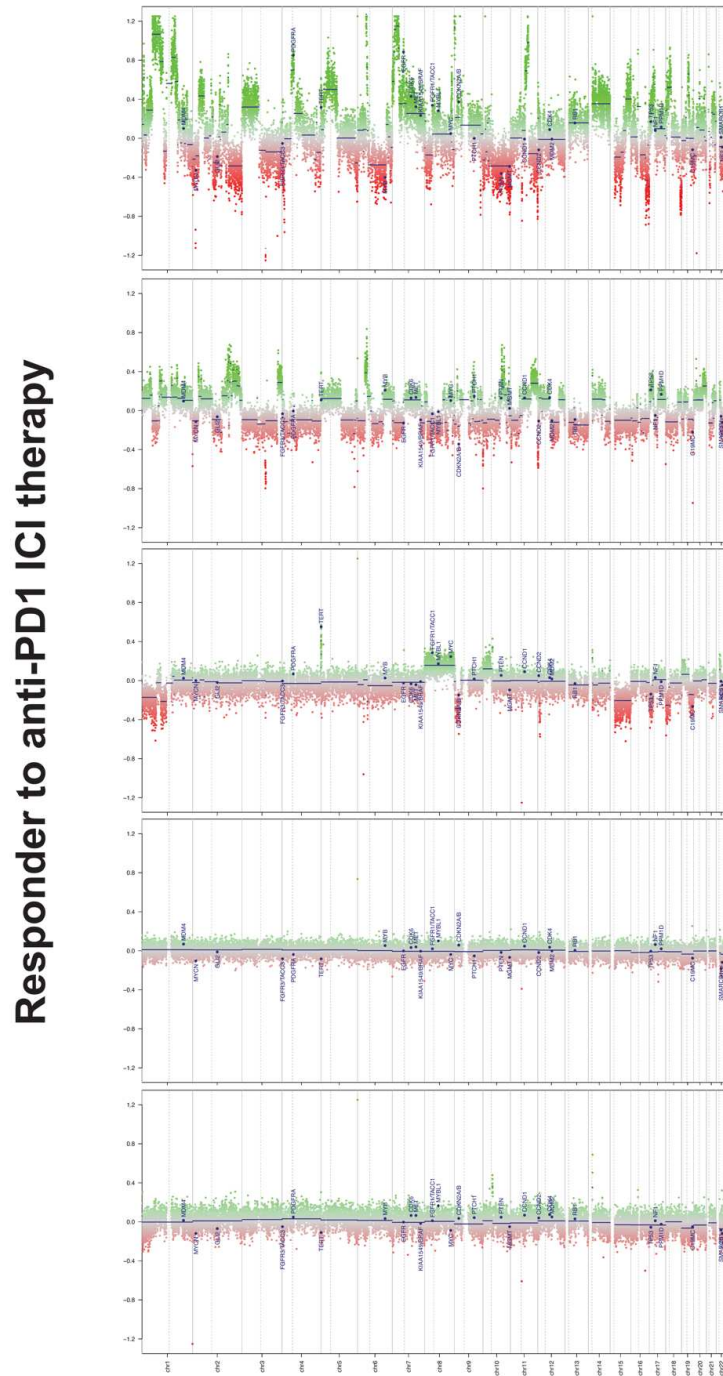

**Supplementary Figure S7.** Copy number variations in 5 sarcoma patients responding to anti-PD-1 ICI.



**Supplementary Table S1.** Detailed patient listing for Center 1

| ID | Sex | Age in years* | Histologic sarcoma type, localization          | Sites of metastases*                 | Prior therapy lines*                                                                                                         | Previous relapse free survival in months | Anti-PD-1 ICI specimen | PFS* (in months) | Response to anti-PD-1 ICI (iRECIST) |
|----|-----|---------------|------------------------------------------------|--------------------------------------|------------------------------------------------------------------------------------------------------------------------------|------------------------------------------|------------------------|------------------|-------------------------------------|
| 1  | m   | 34            | Ossifying fibromyxoid tumor, upper thigh       | Lung, bone, soft tissue, lymph nodes | Anthracycline, ifosfamide, pazopanib, regorafenib, gemcitabine/dacarbazine, trabectedin, anthracycline, taxane, temsirolimus | 2.5                                      | Pembrolizumab          | 1.9              | PD                                  |
| 2  | f   | 50            | Myxofibrosarcoma, cervical                     | Soft tissue                          | Anthracycline, pazopanib, gemcitabine/dacarbazine                                                                            | 2.5                                      | Pembrolizumab          | 7.3              | SD                                  |
| 3  | f   | 50            | Myxofibrosarcoma, gluteal                      | Lung, soft tissue                    | Anthracycline, ifosfamide, gemcitabine/dacarbazine, trabectedine, pazopanib                                                  | 0.7                                      | Pembrolizumab          | 0.8              | PD                                  |
| 4  | f   | 59            | Dedifferentiated liposarcoma, retroperitoneal  | Local recurrence                     | Taxane                                                                                                                       | 2.9                                      | Pembrolizumab          | 8.2              | SD                                  |
| 5  | m   | 65            | Myxoid chondrosarcoma, ribs                    | Lung, soft tissue, lymph nodes       | Sunitinib, anthracycline, ifosfamide                                                                                         | 8.2                                      | Pembrolizumab          | 5.9              | PD                                  |
| 6  | f   | 43            | Myxoid/round cell liposarcoma, retroperitoneal | Soft tissue, lymph nodes             | Anthracycline, trabectedin, taxane, gemcitabine/dacarbazine                                                                  | 5.3                                      | Pembrolizumab          | 10.7             | SD                                  |
| 7  | m   | 54            | Extra skeletal myxoid chondrosarcoma, hip      | Lung, soft tissue                    | Anthracycline                                                                                                                | 25.8                                     | Pembrolizumab          | 3                | PD                                  |
| 8  | m   | 50            | Chondrosarcoma, hip                            | Bone                                 | Denosumab                                                                                                                    | 2.9                                      | Pembrolizumab          | 9.4              | SD                                  |
| 9  | f   | 40            | Angiosarcoma, breast                           | Lung, liver, soft tissue, bone       | Taxane/pazopanib, trabectedin, anthracycline                                                                                 | 5.2                                      | Pembrolizumab          | 0.4              | PD                                  |
| 10 | m   | 53            | Dedifferentiated liposarcoma, retroperitoneal  | Lung, soft tissue                    | Anthracycline/ ifosfamide, trabectedin, taxane                                                                               | 2.6                                      | Pembrolizumab          | 8.8              | SD                                  |
| 11 | f   | 26            | Synovial sarcoma, upper thigh                  | Lung, soft tissue                    | Anthracycline, trabectedin, ifosfamide                                                                                       | 2.6                                      | Pembrolizumab          | 1.9              | SD                                  |

|    |   |    |                                               |                                             |                                                                                  |      |               |      |    |
|----|---|----|-----------------------------------------------|---------------------------------------------|----------------------------------------------------------------------------------|------|---------------|------|----|
| 12 | m | 52 | Epithelioid sarcoma, knee                     | Lung, bone                                  | Olaratumumab/placebo/anthracycline, gemcitabine/dacarbazine, trabectedin         | 1.6  | Pembrolizumab | 13.5 | PR |
| 13 | f | 41 | Osteoblastic osteosarcoma, jaw                | Lung, liver, bone, lymph nodes, soft tissue | Methotrexate/cisplatin/anthracycline, gemcitabine/dacarbazine, trabectedin       | 15.6 | Pembrolizumab | 30.1 | PR |
| 14 | f | 60 | Extra skeletal osteosarcoma, uterus           | Soft tissue                                 | Anthracycline/ifosfamide                                                         | 3.7  | Pembrolizumab | 16.5 | CR |
| 15 | m | 49 | Chondrosarcoma, hip                           | Lung, bone                                  | Methotrexate/cisplatin/anthracycline                                             | 1.3  | Pembrolizumab | 1.8  | PD |
| 16 | m | 55 | Dedifferentiated liposarcoma, retroperitoneal | Soft tissue, bone                           | Olaratumumab/placebo/anthracycline, trabectedin, taxane, gemcitabine/dacarbazine | 2.5  | Pembrolizumab | 1.8  | PD |
| 17 | m | 56 | Chordoma, hip                                 | Soft tissue, lymph nodes                    | Sunitinib                                                                        | 1.4  | Pembrolizumab | 7.5  | SD |
| 18 | m | 27 | Osteosarcoma, upper arm                       | Lung, soft tissue                           | Methotrexate/cisplatin/anthracycline, chemotherapy                               | 2.1  | Pembrolizumab | 32.6 | CR |
| 19 | f | 23 | Osteosarcoma, upper thigh                     | Lymph nodes                                 | Methotrexate/cisplatin/anthracycline                                             | 7.2  | Pembrolizumab | 17.9 | CR |
| 20 | f | 25 | Alveolar soft part sarcoma, upper thigh       | Lung, liver, bone, lymph nodes              | Sunitinib                                                                        | 47.8 | Pembrolizumab | 1.3  | PD |

\*at/from anti-PD-1 ICI therapy start

Abbreviations: f female, m male, PD-1 programmed cell death 1, ICI immune checkpoint inhibitor, CR complete response, PR partial response, SD stable disease, PD progressive disease

**Supplementary Table S2.** Detailed patient listing for Center 2

| ID | Sex | Age in years* | Histologic sarcoma type, localization                      | Number of metastatic organ sites* | Number of prior therapy lines* | Anti-PD-1 ICI specimen | PFS in months* | Response to anti-PD-1 ICI (iRECIST) |
|----|-----|---------------|------------------------------------------------------------|-----------------------------------|--------------------------------|------------------------|----------------|-------------------------------------|
| 1  | f   | 81            | Myxofibrosarcoma, lower limb                               | 1                                 | 0                              | Pembrolizumab          | 0.3            | PD                                  |
| 2  | f   | 61            | Uterine leiomyosarcoma, abdomen and retroperitoneal        | 4                                 | 7                              | Nivolumab              | 1.9            | PD                                  |
| 3  | m   | 27            | Alveolar soft part sarcoma, lower limb                     | 2                                 | 1                              | Pembrolizumab          | 19.7           | PR                                  |
| 4  | f   | 60            | Angiosarcoma, chest wall                                   | 3                                 | 4                              | Pembrolizumab          | 0.6            | PD                                  |
| 5  | m   | 36            | Alveolar soft part sarcoma, lower limb                     | 4                                 | 4                              | Pembrolizumab          | 9.3            | PR                                  |
| 6  | f   | 56            | Myxofibrosarcoma, lower limb                               | 4                                 | 4                              | Pembrolizumab          | 2.5            | PD                                  |
| 7  | f   | 23            | Alveolar soft part sarcoma, lower limb                     | 3                                 | 2                              | Pembrolizumab          | 11.2           | SD                                  |
| 8  | f   | 26            | Epitheloide sarcoma, upper limb                            | 2                                 | 4                              | Nivolumab              | 2.6            | PD                                  |
| 9  | m   | 23            | Spindel cell rhabdomyosarcoma, abdomen and retroperitoneal | 4                                 | 4                              | Pembrolizumab          | 1.0            | PD                                  |
| 10 | m   | 75            | Dedifferentiated liposarcoma, abdomen and retroperitoneal  | 1                                 | 4                              | Pembrolizumab          | 0.6            | PD                                  |
| 11 | m   | 39            | Chordoma, spine                                            | 1                                 | 0                              | Nivolumab              | 24.3           | PR                                  |
| 12 | m   | 56            | Dedifferentiated chondrosarcoma, upper limb                | 2                                 | 1                              | Nivolumab              | 1.2            | PD                                  |
| 13 | f   | 69            | Histiocytic sarcoma, head and neck                         | 2                                 | 2                              | Nivolumab              | 1.6            | PD                                  |
| 14 | f   | 49            | Spindel cell sarcoma, NOS, upper limb                      | 4                                 | 5                              | Pembrolizumab          | 2.5            | PD                                  |

|    |   |    |                                                           |   |   |               |     |    |
|----|---|----|-----------------------------------------------------------|---|---|---------------|-----|----|
| 15 | m | 49 | Dedifferentiated liposarcoma, abdomen and retroperitoneal | 4 | 3 | Pembrolizumab | 3.9 | PD |
|----|---|----|-----------------------------------------------------------|---|---|---------------|-----|----|

\*at/from anti-PD-1 ICI therapy start

Abbreviations: f female, m male, PD-1 programmed cell death 1, ICI immune checkpoint inhibitor, NOS not otherwise specified, PR partial response, SD stable disease, PD progressive disease

**Supplementary Table S3.** Antibodies and dilution protocols used for immunohistochemical analyses

| <b>Marker</b> | <b>Antibody Clone</b>                                      | <b>LOT number</b> | <b>Company</b>                         | <b>Dilution</b> |
|---------------|------------------------------------------------------------|-------------------|----------------------------------------|-----------------|
| <b>CD3</b>    | rabbit mAb, Clone SP7                                      | 910751903 B       | Thermo Fisher Scientific, Cheshire, UK | 1:200           |
| <b>CD8</b>    | mouse mAb, Clone C8/144B/M7103                             | 20066516          | DakoCytomation, Glostrup, Denmark      | 1:100           |
| <b>CD45RO</b> | mouse mAb, Clone UCHL1                                     | 20059854          | DakoCytomation, Glostrup, Denmark      | 1:400           |
| <b>FOXP3</b>  | mouse mAb, Clone 206D                                      | B231983           | BioLegend, San Diego, CA, USA          | 1:25            |
| <b>PD-L1</b>  | mouse mAb, Clone 5H1 (kindly provided by Dr. Lieping Chen) | BSH 100-6cd       | BioSite                                | 1:50            |
| <b>PD-1</b>   | mouse mAb, ab52587                                         | GR3174613-8       | Abcam, Cambridge, UK                   | 1:750           |
| <b>LAG3</b>   | LAG3/C18692                                                | 132277            | BioScience                             | 1:100           |

Abbreviations: CD3, cluster of differentiation 3; CD8, cluster of differentiation 8; FOXP3, Forkhead Box Protein P3; PD-1, Programmed cell death 1; PD-L1, Programmed cell death ligand 1; mAb, monoclonal antibody; CD20, Cluster of differentiation 20; Lag3, Lymphocyte-activation gene 3.
