# Supplementary material for: Tumor DNA methylation profiles correlate with response to anti-PD-1 immune checkpoint inhibitor monotherapy in sarcoma patients
Source: HighWire-hosted journal article supplement (doi:10.1136/jitc-2020-001458), 2021-03-01
Supplement: jitc-2020-001458supp002_data_supplement.xlsx [file jitc-2020-001458supp002_data_supplement.xlsx]

## Sheet: S_Table_4
Supplementary Table S4. Annotation of 2,453 DMPs between responders and non-responders to anti-PD1-ICI
id	Chromosome	Position	Strand	Gene Symbol	Location	CGI	Beta difference	FDR
cg14049288	chr1	209999927	R	DIEXF	TSS1500	shore	-0.145643	0.000109352
cg14294708	chr9	37120828	F	ZCCHC7	5'UTR	island	0.186509	0.000439572
cg12079266	chr18	55924005	F	NEDD4L	5'UTR	island	-0.164225	0.000439572
cg00581783	chr3	183731991	F	ABCC5	Body	shelf	-0.122935	0.000463421
cg24818111	chr10	54070178	R	PRKG1-AS1	Body	shelf	-0.125581	0.000490441
cg07872947	chr2	1732172	R	PXDN	Body	opensea	-0.171273	0.000834603
cg02309613	chr1	59484600	F	NA	IGR	opensea	-0.169974	0.000992602
cg25574153	chr10	105807969	F	MIR936	TSS200	opensea	-0.11884	0.000998817
cg02320600	chr22	42243577	R	SREBF2	Body	opensea	-0.114735	0.00108143
cg23045526	chr20	57084766	F	APCDD1L	Body	opensea	-0.104139	0.00108143
cg09280838	chr1	184531772	R	C1orf21	Body	opensea	-0.17447	0.00170064
cg05030183	chr6	109408740	F	SESN1	Body	opensea	-0.113694	0.00178957
cg03192874	chr2	187474432	F	ITGAV	Body	opensea	-0.137247	0.00214007
cg10827181	chr5	96120299	F	ERAP1	Body	opensea	-0.2572	0.0021773
cg02327789	chr11	102195794	R	BIRC3	Body	opensea	-0.105853	0.00236862
cg17367708	chr13	38060376	R	LINC01048	TSS1500	opensea	0.163657	0.00258046
cg13863921	chr5	142576395	F	ARHGAP26	Body	opensea	-0.191815	0.00258046
cg17290170	chr9	116065464	R	NA	IGR	opensea	-0.219101	0.00259239
cg03899654	chr21	45361964	R	AGPAT3	5'UTR	shore	-0.171236	0.00259239
cg13353330	chr2	102841996	F	IL1RL2	Body	opensea	-0.14428	0.00259239
cg18573251	chr11	61685748	F	RAB3IL1	TSS1500	shore	-0.136595	0.00259239
cg02881893	chr15	57240836	F	TCF12	Body	opensea	-0.164565	0.00269206
cg04078292	chr16	4066077	F	ADCY9	Body	opensea	-0.15457	0.00269206
cg19271225	chr9	36135042	R	GLIPR2	TSS1500	shore	-0.128306	0.00269206
cg15895820	chr12	2565266	R	CACNA1C	Body	opensea	-0.121281	0.00269206
cg25883923	chr20	57192288	F	APCDD1L-AS1	Body	opensea	-0.150244	0.00290226
cg24803853	chr1	14079484	R	PRDM2	Body	shelf	-0.126053	0.00293442
cg19024352	chr17	58381213	R	USP32	Body	opensea	-0.145108	0.0031152
cg26568189	chr1	44330548	F	ST3GAL3	Body	opensea	-0.124281	0.0031152
cg01567825	chr7	111368651	R	DOCK4	Body	island	-0.131434	0.00318754
cg13924834	chr2	118716205	R	CCDC93	Body	opensea	-0.105886	0.00359095
cg23530232	chr1	9302240	R	H6PD	5'UTR	opensea	-0.198474	0.00376195
cg14850831	chr22	24938711	R	GUCD1	3'UTR	opensea	-0.167502	0.00376195
cg00162001	chr2	42479385	F	EML4	Body	opensea	-0.156724	0.00376195
cg07049764	chr6	134940440	F	NA	IGR	opensea	-0.107166	0.00376195
cg18450832	chr5	37250092	R	C5orf42	TSS1500	shore	-0.118099	0.00414627
cg08482926	chr16	85283655	R	NA	IGR	opensea	-0.168425	0.00416473
cg23050371	chr3	49567667	R	DAG1	Body	opensea	-0.124225	0.00416473
cg10035173	chr22	31534043	R	PLA2G3	Body	opensea	0.128771	0.00433129
cg16868066	chr15	42130989	F	PLA2G4B	TSS200	opensea	-0.106439	0.00454794
cg14189890	chr6	146131001	R	FBXO30	5'UTR	opensea	-0.19665	0.0051939
cg03224385	chr19	3250946	R	CELF5	Body	opensea	0.153831	0.00567494
cg07670516	chr17	5019840	R	ZNF232	5'UTR	island	-0.172535	0.00567494
cg15722243	chr4	13954845	F	NA	IGR	opensea	-0.140219	0.00567494
cg05040464	chr9	97886747	R	FANCC	Body	opensea	-0.131974	0.00567494
cg13903578	chr7	55146187	R	EGFR	Body	opensea	-0.131932	0.00567494
cg27598340	chr7	55145727	F	EGFR	Body	opensea	-0.131673	0.00567494
cg15160746	chr12	2743239	F	CACNA1C	Body	opensea	-0.129332	0.00567494
cg10550611	chr7	55147158	R	EGFR	Body	opensea	-0.115211	0.00567494
cg16132649	chr20	33126790	R	DYNLRB1	Body	opensea	-0.102269	0.00567494
cg05906024	chr5	168271859	F	SLIT3	Body	opensea	-0.194932	0.00584447
cg06104764	chr4	77122220	R	SCARB2	Body	opensea	-0.165145	0.00584447
cg25403856	chr2	225820242	R	DOCK10	Body	opensea	-0.163145	0.00584447
cg20364187	chr16	3139060	R	ZSCAN10	3'UTR	island	-0.156669	0.00584447
cg18724912	chr7	75357247	F	HIP1	Body	opensea	-0.130175	0.00584447
cg15779785	chr12	2521414	F	CACNA1C	Body	opensea	-0.128175	0.00584447
cg02612045	chr5	80529943	R	RNU5E	Body	opensea	-0.117315	0.00584447
cg20560376	chr12	6342778	R	CD9	Body	opensea	-0.109393	0.00584447
cg03161787	chr20	30174425	F	NA	IGR	shore	-0.106884	0.00584447
cg05224659	chr2	43295595	R	NA	IGR	shore	-0.100861	0.00584447
cg21727276	chr20	44036723	R	DBNDD2	5'UTR	shore	-0.15242	0.00603548
cg02051688	chr11	111568985	R	SIK2	Body	opensea	-0.180298	0.00609083
cg07597071	chr15	58638577	R	NA	IGR	opensea	-0.123166	0.00609083
cg06948658	chr12	2552733	F	CACNA1C	Body	opensea	-0.184721	0.00630538
cg00083193	chr15	65337425	F	OSTBETA	TSS1500	opensea	-0.182305	0.00630538
cg03440994	chr2	44522866	R	SLC3A1	Body	opensea	-0.165294	0.00630538
cg04496284	chr2	151260928	R	NA	IGR	opensea	-0.160782	0.00630538
cg11189986	chr7	41922264	R	NA	IGR	opensea	-0.158943	0.00630538
cg01014438	chr12	2762689	F	CACNA1C	Body	opensea	-0.10843	0.00630538
cg10904336	chr8	17645951	R	MTUS1	5'UTR	opensea	-0.256188	0.00632812
cg00569056	chr5	121416239	R	NA	IGR	shelf	-0.174763	0.00632812
cg21096050	chr4	85502665	F	CDS1	TSS1500	shore	-0.137952	0.00661795
cg24591824	chr12	2762732	R	CACNA1C	Body	opensea	-0.125225	0.00671208
cg24895052	chr17	41909601	F	MPP3	5'UTR	shore	-0.114343	0.00686497
cg00616000	chr7	6521599	R	KDELR2	Body	shore	0.153256	0.00707496
cg14360293	chr16	66786621	F	DYNC1LI2	TSS1500	shore	-0.216441	0.00707496
cg21611965	chr12	2716857	R	CACNA1C	Body	opensea	-0.145698	0.00707496
cg00533825	chr11	44625682	R	CD82	Body	opensea	-0.12951	0.00707496
cg08173709	chr3	71103443	R	FOXP1	Body	opensea	-0.119614	0.00707496
cg04303964	chr22	19949561	R	COMT	TSS1500	opensea	-0.107998	0.00707496
cg06441457	chr1	8273949	R	LOC102724539	Body	shore	-0.175509	0.00709826
cg07082645	chr12	2348612	F	CACNA1C	Body	opensea	-0.165995	0.00709826
cg24535649	chr12	2557985	R	CACNA1C	Body	opensea	-0.16359	0.00709826
cg04184807	chr9	128231148	F	MAPKAP1	Body	opensea	-0.180644	0.00723624
cg27610686	chr17	76288170	R	NA	IGR	opensea	-0.152887	0.00723624
cg09625543	chr21	40560659	R	BRWD1	3'UTR	opensea	-0.151949	0.00723624
cg16464659	chr10	96052474	F	PLCE1	Body	opensea	0.135093	0.00733034
cg03388879	chr2	201175772	R	SPATS2L	5'UTR	shelf	-0.162898	0.00733034
cg16066771	chr12	2760655	R	CACNA1C	Body	opensea	-0.123351	0.00733034
cg15180629	chr1	151611270	R	SNX27	Body	opensea	-0.158148	0.00744435
cg12974120	chr14	105953166	R	CRIP1	TSS200	island	0.160688	0.00746601
cg24221044	chr4	185275159	F	LOC728175	TSS200	opensea	-0.144596	0.00746601
cg15289534	chr4	119958640	F	SYNPO2	3'UTR	opensea	-0.14186	0.00746601
cg02245875	chr20	17552881	R	DSTN	Body	shore	-0.179302	0.00766172
cg01360235	chr22	32049314	F	NA	IGR	opensea	-0.116401	0.00779401
cg06194338	chr5	180622450	F	TRIM7	Body	island	-0.104091	0.00779401
cg21929238	chr2	27477016	R	NA	IGR	opensea	-0.154553	0.00792833
cg15369821	chr6	164281903	F	NA	IGR	opensea	0.109223	0.00794325
cg00241002	chr10	26931912	R	LOC731789	TSS200	opensea	0.249755	0.00794325
cg13020245	chr2	113995370	F	PAX8-AS1	Body	shore	-0.193615	0.00794325
cg27474266	chr8	72842838	R	NA	IGR	opensea	-0.142574	0.00794325
cg02168442	chr8	102236522	F	NA	IGR	island	-0.131559	0.00794325
cg02019119	chr5	178668901	R	ADAMTS2	Body	opensea	-0.124271	0.00794325
cg24430782	chr12	2760128	F	CACNA1C	Body	opensea	-0.122491	0.00794325
cg00159552	chr22	47245100	R	TBC1D22A	Body	opensea	-0.122003	0.00794325
cg01632455	chr6	42056303	F	NA	IGR	opensea	-0.115477	0.00794325
cg01045959	chr15	60774609	R	NA	IGR	shelf	-0.102053	0.00794325
cg10652432	chr10	63854401	R	ARID5B	3'UTR	opensea	-0.149951	0.00831478
cg21523115	chr12	45801018	F	ANO6	Body	opensea	-0.163901	0.00832669
cg16135549	chr5	67521729	R	PIK3R1	5'UTR	opensea	-0.147371	0.00832669
cg05438007	chr20	57047906	F	APCDD1L	Body	opensea	-0.147654	0.00834981
cg08847738	chr16	53535767	R	AKTIP	5'UTR	shore	-0.114829	0.00845195
cg22533677	chr16	67145932	R	C16orf70	Body	shore	-0.142918	0.00856341
cg15489196	chr2	1732347	R	PXDN	Body	opensea	-0.166055	0.00871128
cg18709543	chr16	10654469	R	EMP2	5'UTR	opensea	-0.141902	0.00886225
cg13815482	chr15	63689196	R	LOC102723344	Body	opensea	-0.149806	0.00902996
cg21221855	chr5	96122486	F	ERAP1	Body	opensea	-0.124536	0.00902996
cg17841203	chr6	5057334	F	LOC100129461	Body	opensea	-0.135248	0.00910274
cg26161895	chr4	159697468	F	FNIP2	Body	opensea	-0.201072	0.00925743
cg24437775	chr6	113860384	R	NA	IGR	opensea	-0.167941	0.00925743
cg01607569	chr3	48696613	F	CELSR3	1stExon	shore	-0.165053	0.00935474
cg07203951	chr1	90021510	R	LRRC8B	5'UTR	opensea	-0.163287	0.00935474
cg04864877	chr2	208735200	F	PLEKHM3	Body	opensea	-0.179315	0.00955203
cg24530041	chr15	90349551	R	ANPEP	Body	opensea	-0.116176	0.00955203
cg04900856	chr19	6534763	R	TNFSF9	Body	island	-0.159362	0.00956829
cg24109275	chr16	4066092	F	ADCY9	Body	opensea	-0.138475	0.00956969
cg20876166	chr1	62175038	R	TM2D1	Body	opensea	-0.132428	0.00956969
cg02315483	chr19	44487129	F	ZNF155	TSS1500	opensea	-0.114964	0.00956969
cg06859463	chr11	46300215	F	CREB3L1	Body	island	0.132759	0.00959397
cg07173278	chr3	128102733	F	EEFSEC	Body	opensea	-0.15037	0.00959397
cg13537240	chr12	2761549	R	CACNA1C	Body	opensea	-0.164008	0.00963147
cg19776833	chr3	71057616	F	FOXP1	Body	opensea	-0.147848	0.00987973
cg03964819	chr5	1537611	R	NA	IGR	opensea	-0.105074	0.0100032
cg11190658	chr1	32711840	F	FAM167B	TSS1500	shelf	-0.180083	0.0108219
cg10214933	chr2	216715262	R	NA	IGR	opensea	-0.140542	0.0108219
cg16135424	chr17	58236681	R	CA4	Body	opensea	-0.174239	0.0108306
cg20667036	chr15	37048076	F	C15orf41	Body	opensea	-0.155046	0.0108306
cg13636978	chr8	15598297	R	TUSC3	Body	opensea	-0.144234	0.0108306
cg14830748	chr8	97592199	F	SDC2	Body	opensea	-0.11846	0.0109184
cg12054323	chr18	65185523	R	LOC643542	Body	shore	-0.132687	0.0112151
cg23619144	chr7	55146526	R	EGFR	Body	opensea	-0.12758	0.0112416
cg09694527	chr12	123918498	R	RILPL2	Body	shelf	-0.120696	0.0119133
cg03599984	chr2	97498742	R	CNNM3	3'UTR	opensea	-0.200245	0.0120662
cg15398497	chr2	26787764	F	C2orf70	Body	shore	0.115744	0.0131662
cg11715742	chr4	153311621	R	FBXW7	Body	opensea	-0.15541	0.0131662
cg05090351	chr10	126851162	R	NA	IGR	island	-0.14727	0.0131662
cg00865477	chr7	28661152	R	CREB5	Body	opensea	-0.122891	0.0133576
cg20157874	chr4	123835713	F	NUDT6	Body	opensea	0.109683	0.0135095
cg12548555	chr2	42411128	F	EML4	Body	opensea	-0.199828	0.0135697
cg17101943	chr8	22403187	F	NA	IGR	opensea	-0.146816	0.0136005
cg10825151	chr10	91236601	R	SLC16A12	5'UTR	opensea	-0.193035	0.0136314
cg25684151	chr8	126588554	F	NA	IGR	opensea	-0.190571	0.0136314
cg23703963	chr14	105953300	R	CRIP1	1stExon	island	0.157865	0.013859
cg14688342	chr7	55147074	F	EGFR	Body	opensea	-0.116014	0.013859
cg19738398	chr15	90589526	F	ZNF710	5'UTR	opensea	-0.135489	0.0139163
cg00980287	chr5	67483621	F	NA	IGR	opensea	-0.215519	0.0141217
cg02494582	chr10	128061835	R	ADAM12	Body	opensea	-0.213459	0.0143736
cg04097236	chr6	11008618	R	ELOVL2	Body	opensea	-0.137563	0.0143736
cg26308909	chr7	2233090	F	MAD1L1	Body	opensea	-0.124255	0.0143736
cg11079097	chr17	74688069	R	MXRA7	Body	opensea	-0.117036	0.0145953
cg13831910	chr7	44669980	F	OGDH	Body	opensea	-0.14862	0.0146428
cg16794250	chr20	57192078	R	APCDD1L-AS1	Body	opensea	-0.115384	0.0146428
cg21421832	chr15	85421847	F	NA	IGR	opensea	-0.10974	0.0149982
cg03026003	chr8	67372499	R	ADHFE1	Body	opensea	0.112969	0.0152676
cg16524818	chr1	236162295	R	NID1	Body	opensea	-0.123062	0.0152676
cg16028136	chr14	69095349	F	NA	IGR	island	-0.165894	0.0152907
cg05728554	chr8	91655815	F	TMEM64	Body	shore	-0.241812	0.015358
cg06352352	chr16	67181466	R	C16orf70	3'UTR	shore	-0.140046	0.015358
cg03163819	chr17	41166703	F	VAT1	3'UTR	opensea	-0.112785	0.015358
cg18826875	chr16	4838636	F	SMIM22	1stExon	opensea	-0.169359	0.0153843
cg20714328	chr5	79331850	F	THBS4	Body	shore	-0.142566	0.0153843
cg26600753	chr5	180622446	F	TRIM7	Body	island	-0.102841	0.0153843
cg17852482	chr17	80833054	F	TBCD	Body	shelf	-0.134636	0.0154775
cg25167574	chr4	79861398	F	PAQR3	TSS1500	shore	-0.15626	0.0155182
cg14982665	chr12	2631826	R	CACNA1C	Body	opensea	-0.139848	0.0155991
cg04778099	chr7	47445517	R	TNS3	Body	opensea	-0.244392	0.0159094
cg18318843	chr8	42354362	F	SLC20A2	5'UTR	opensea	-0.156742	0.0159094
cg10030658	chr6	56298004	R	NA	IGR	island	-0.127964	0.0160376
cg01771096	chr6	161638100	R	AGPAT4	Body	opensea	-0.108513	0.0160376
cg22019901	chr14	67634668	R	GPHN	Body	opensea	-0.118744	0.0163509
cg14556503	chr6	74104870	R	DDX43	1stExon	island	-0.223911	0.0164707
cg01395174	chr9	97713002	R	C9orf3	Body	opensea	-0.181042	0.0164707
cg21585100	chr18	55922747	R	NEDD4L	5'UTR	shore	-0.164078	0.0164707
cg09971488	chr15	31253792	R	MTMR10	Body	opensea	-0.156472	0.0164707
cg14179575	chr18	13826399	R	MC5R	1stExon	island	-0.151923	0.0164707
cg20243573	chr7	45618802	F	ADCY1	5'UTR	shelf	-0.101411	0.0164707
cg01996459	chr10	91236801	F	SLC16A12	5'UTR	opensea	-0.202337	0.0165495
cg24708097	chr7	116155628	F	NA	IGR	opensea	-0.177118	0.0167317
cg04328166	chr12	2727540	F	CACNA1C	Body	opensea	-0.157229	0.0167317
cg13080184	chr7	127524642	R	SND1	Body	opensea	-0.105094	0.0167317
cg10888461	chr4	113300821	R	ALPK1	Body	shore	-0.156356	0.0167577
cg01453281	chr2	105475049	F	NA	IGR	shore	-0.242384	0.0171273
cg04171303	chr9	129871732	F	ANGPTL2	5'UTR	opensea	-0.180247	0.0171273
cg13984928	chr17	3704574	F	ITGAE	TSS200	opensea	-0.157284	0.0171273
cg19567023	chr13	99914020	F	UBAC2	Body	opensea	-0.122659	0.0172079
cg17430651	chr7	617894	F	PRKAR1B	Body	shore	-0.190994	0.0172101
cg17250812	chr3	141460046	F	RNF7	Body	shelf	-0.128236	0.0175224
cg14980255	chr15	37190694	R	MEIS2	Body	opensea	-0.159895	0.0175758
cg17978103	chr20	56272305	F	PMEPA1	5'UTR	opensea	-0.111797	0.0177285
cg14820356	chr2	46265385	F	PRKCE	Body	opensea	-0.226128	0.0181359
cg20030796	chr17	72356254	F	BTBD17	Body	island	-0.167964	0.0181359
cg18306575	chr2	10507732	R	HPCAL1	TSS1500	opensea	-0.101248	0.0181457
cg25734905	chr22	26455865	F	NA	IGR	opensea	0.129745	0.0183634
cg20979637	chr8	57907494	R	IMPAD1	TSS1500	shore	-0.17803	0.0184395
cg15083678	chr12	2724200	F	CACNA1C	Body	opensea	-0.119051	0.0184395
cg26575105	chr6	109010960	F	NA	IGR	opensea	-0.205757	0.0184618
cg12985065	chr8	140744488	R	TRAPPC9	Body	island	0.106846	0.0188937
cg08518510	chr22	28679009	R	TTC28	Body	opensea	0.203595	0.0189056
cg05729683	chr10	91177953	F	IFIT5	Body	shelf	-0.14926	0.0189056
cg15344028	chr2	204801510	F	ICOS	5'UTR	opensea	-0.129753	0.0189056
cg10787639	chr6	107673937	F	PDSS2	Body	opensea	-0.128927	0.0189056
cg19498794	chr1	178445641	F	RASAL2	3'UTR	opensea	-0.113681	0.0189056
cg24643922	chr10	134236975	F	NA	IGR	opensea	-0.110118	0.0189056
cg26368049	chr3	49572730	F	DAG1	3'UTR	opensea	-0.10817	0.0189056
cg17739868	chr6	157751337	R	NA	IGR	opensea	-0.209947	0.0190005
cg13618516	chr17	79129078	R	AATK	Body	shelf	-0.153458	0.019019
cg18392343	chr7	56034817	R	GBAS	Body	shore	-0.141493	0.019019
cg06838840	chr1	100012420	F	NA	IGR	opensea	-0.172026	0.0193887
cg16422786	chr2	97268765	F	KANSL3	Body	opensea	-0.126069	0.0193887
cg06072662	chr6	153406389	R	RGS17	5'UTR	opensea	-0.108343	0.0193887
cg18512146	chr3	128690194	R	KIAA1257	Body	opensea	-0.103315	0.0193887
cg13377633	chr3	98505362	R	ST3GAL6	5'UTR	opensea	-0.163995	0.0194259
cg08497772	chr8	22407100	F	NA	IGR	shore	-0.16286	0.0195074
cg15361247	chr3	45742916	F	SACM1L	Body	opensea	-0.1543	0.0195074
cg16339155	chr10	92622005	R	NA	IGR	shelf	-0.153461	0.0195074
cg19114543	chr3	46996484	R	CCDC12	Body	opensea	-0.105814	0.0195074
cg17022845	chr7	137619909	F	CREB3L2	Body	opensea	-0.261777	0.0195293
cg00618626	chr17	39807901	R	NA	IGR	shelf	-0.15164	0.0195293
cg00006713	chr11	60919286	F	VPS37C	5'UTR	opensea	-0.127582	0.0195293
cg19309227	chr20	30793018	R	PLAGL2	5'UTR	shelf	-0.114596	0.0195293
cg04846343	chr9	115649685	F	SLC46A2	Body	shelf	-0.113124	0.0195293
cg21337252	chr9	85678850	F	RASEF	TSS1500	shore	-0.207113	0.0198183
cg13447038	chr3	159558254	F	SCHIP1	Body	opensea	-0.162959	0.0198183
cg13710520	chr15	64435699	R	SNX1	3'UTR	opensea	-0.125175	0.0198183
cg10208897	chr5	178548229	R	ADAMTS2	Body	island	-0.125137	0.0198183
cg20090279	chr4	99552024	F	TSPAN5	Body	opensea	-0.121734	0.0198183
cg05581314	chr6	30176816	R	TRIM26	5'UTR	opensea	-0.161347	0.0198867
cg04072597	chr19	18716499	R	CRLF1	Body	island	0.137012	0.0199015
cg20107346	chr12	88803163	F	NA	IGR	opensea	-0.151054	0.0200699
cg15723784	chr15	67441067	R	SMAD3	Body	opensea	-0.175746	0.0203144
cg08659707	chr2	20527677	F	PUM2	TSS1500	opensea	-0.100142	0.0203144
cg12881924	chr14	32038080	F	NUBPL	Body	opensea	-0.175154	0.0206151
cg19807237	chr1	218470982	F	RRP15	Body	opensea	-0.103981	0.0208065
cg06975080	chr17	78700928	F	RPTOR	Body	island	-0.102342	0.0208065
cg06911753	chr11	47611236	R	C1QTNF4	3'UTR	island	-0.217601	0.0208737
cg03080664	chr1	156849755	R	NTRK1	Body	opensea	-0.184763	0.0209871
cg23430066	chr8	11618677	R	NA	IGR	opensea	-0.153462	0.0210238
cg02629090	chr8	28923946	R	NA	IGR	opensea	-0.198364	0.0210308
cg07745710	chr12	2785129	F	CACNA1C	Body	shelf	-0.150991	0.0211996
cg20530613	chr3	99440673	F	COL8A1	5'UTR	opensea	-0.202437	0.0212691
cg04725597	chr1	12510657	R	VPS13D	Body	opensea	-0.163866	0.0212891
cg01635960	chr3	197232776	R	NA	IGR	opensea	-0.102905	0.021313
cg22220936	chr12	22484157	R	ST8SIA1	Body	shelf	-0.177493	0.021394
cg08212521	chr1	31437727	F	PUM1	Body	opensea	-0.131312	0.0214692
cg22137075	chr17	61046563	R	NA	IGR	shelf	-0.154437	0.0214919
cg10632966	chr10	105001051	F	NA	IGR	opensea	-0.124871	0.0214919
cg11211204	chr18	55923895	R	NEDD4L	5'UTR	island	-0.123437	0.0214919
cg10319829	chr14	71863267	F	NA	IGR	opensea	-0.111744	0.0214919
cg16556658	chr5	78623553	R	NA	IGR	opensea	-0.100213	0.0216231
cg04944232	chr2	201245106	F	SPATS2L	5'UTR	opensea	-0.12415	0.0216908
cg01964856	chr16	1034270	F	SOX8	Body	island	0.151298	0.0217117
cg06420962	chr1	44690170	R	ERI3	Body	opensea	-0.112746	0.0219089
cg10803594	chr5	132241858	F	AFF4	Body	opensea	-0.171783	0.021938
cg22542139	chr17	17465476	F	PEMT	Body	shore	-0.135979	0.021938
cg22413637	chr17	40924028	F	VPS25	TSS1500	opensea	-0.128933	0.021938
cg07763912	chr16	69274341	F	SNTB2	Body	opensea	0.171293	0.0219679
cg17292626	chr12	110700980	R	NA	IGR	opensea	-0.160889	0.0219956
cg06695683	chr7	95041624	R	PON2	ExonBnd	opensea	-0.145267	0.0219956
cg25549472	chr12	1583801	R	ERC1	Body	opensea	0.214022	0.0222205
cg16897193	chr19	46443801	R	NOVA2	Body	island	-0.185513	0.0222205
cg11792124	chr18	9824694	F	RAB31	Body	opensea	-0.204006	0.0222495
cg08364629	chr9	71659448	R	FXN	Body	opensea	-0.164522	0.0222495
cg14703024	chr11	95631666	R	MTMR2	5'UTR	opensea	-0.126992	0.0222829
cg16923991	chr15	64011253	R	HERC1	Body	opensea	-0.144014	0.0225268
cg14170337	chr6	161687285	R	AGPAT4	5'UTR	opensea	-0.122499	0.022659
cg18868017	chr1	203828140	F	NA	IGR	shelf	-0.106841	0.022659
cg15095482	chr17	61190825	R	TANC2	Body	opensea	-0.104591	0.022659
cg08059631	chr8	6274876	R	MCPH1	Body	opensea	-0.191381	0.0227545
cg09641955	chr12	2716844	F	CACNA1C	Body	opensea	-0.142539	0.0227545
cg17806482	chr7	107608007	R	LAMB1	Body	opensea	-0.113685	0.0227545
cg19240664	chr17	61537528	F	NA	IGR	opensea	-0.129713	0.0230989
cg01808320	chr1	224927238	R	CNIH3	3'UTR	opensea	-0.115656	0.0231355
cg12033528	chr6	109010947	F	NA	IGR	opensea	-0.185136	0.0235985
cg01569601	chr21	46811242	F	NA	IGR	shore	-0.123601	0.0235985
cg05375091	chr18	47175523	R	NA	IGR	opensea	-0.120399	0.0235985
cg12469755	chr5	110937107	R	NA	IGR	opensea	-0.127819	0.0236069
cg22761819	chr12	2576247	R	CACNA1C	Body	opensea	-0.161369	0.0237265
cg02714994	chr19	15870836	F	NA	IGR	shore	0.157835	0.0237642
cg24188561	chr19	39387769	R	SIRT2	5'UTR	shelf	-0.126786	0.0238346
cg08422172	chr16	11886668	R	NA	IGR	shelf	-0.189147	0.0238711
cg22939709	chr22	31498218	R	SMTN	Body	shelf	0.117107	0.0239517
cg10368284	chr12	2762214	F	CACNA1C	Body	opensea	-0.15563	0.0239517
cg25958061	chr9	75752435	F	NA	IGR	opensea	-0.172158	0.024082
cg25478700	chr17	426062	R	VPS53	Body	opensea	-0.171053	0.024082
cg05629278	chr2	225874509	F	DOCK10	Body	opensea	-0.15659	0.024082
cg07379703	chr5	78279424	F	ARSB	Body	shore	-0.152983	0.024082
cg02321903	chr11	60926056	F	VPS37C	5'UTR	shelf	-0.103038	0.024082
cg16973208	chr20	47414006	F	PREX1	Body	opensea	-0.18263	0.0241544
cg15885139	chr1	56654760	F	NA	IGR	opensea	-0.197153	0.024227
cg15271822	chr12	19668405	F	AEBP2	Body	opensea	-0.141291	0.0242857
cg05510104	chr1	16062735	R	SLC25A34	TSS200	opensea	-0.123999	0.0242857
cg12441650	chr16	31148394	R	PRSS8	TSS1500	opensea	-0.123602	0.0242857
cg16170885	chr3	72028211	F	NA	IGR	opensea	-0.113912	0.0242857
cg01821684	chr7	6415217	R	RAC1	Body	shore	0.105834	0.0243463
cg18757619	chr2	55298496	F	NA	IGR	opensea	-0.109217	0.0243463
cg23001785	chr5	3336918	F	NA	IGR	opensea	0.169705	0.0243528
cg12529561	chr3	188535876	F	LPP	Body	opensea	-0.183124	0.0243528
cg12914461	chr7	116654256	F	ST7	Body	opensea	-0.174852	0.0243528
cg12276348	chr15	91140248	R	CRTC3	Body	opensea	-0.171122	0.0243528
cg20102877	chr2	27665638	R	KRTCAP3	Body	island	-0.156234	0.0243528
cg08719237	chr1	39728532	R	MACF1	Body	opensea	-0.149613	0.0243528
cg16809138	chr17	64672277	F	PRKCA	Body	opensea	-0.144817	0.0243528
cg18554732	chr12	51013353	R	DIP2B	Body	opensea	-0.119981	0.0243528
cg13911530	chr1	110370974	R	NA	IGR	opensea	-0.119897	0.0243528
cg05942702	chr10	106082244	R	LOC101927472	TSS1500	opensea	-0.101409	0.0243528
cg10204149	chr1	185887761	R	HMCN1	Body	opensea	-0.100435	0.0243528
cg19388280	chr3	170459454	F	NA	IGR	opensea	0.163301	0.0245861
cg22596978	chr4	153329958	F	FBXW7	Body	opensea	-0.154747	0.0245861
cg12092223	chr18	34756489	F	KIAA1328	Body	opensea	-0.130101	0.0245861
cg14601621	chr9	97848457	F	C9orf3	3'UTR	island	-0.183631	0.0246469
cg13462173	chr15	24722458	R	NA	IGR	shore	0.110933	0.024706
cg03306998	chr11	11184974	R	NA	IGR	opensea	0.141198	0.024706
cg02531227	chr12	129460621	R	GLT1D1	Body	opensea	0.142361	0.024706
cg19918599	chr3	112366281	F	NA	IGR	opensea	-0.215601	0.024706
cg16215361	chr11	26594620	F	MUC15	TSS1500	opensea	-0.153227	0.024706
cg16672680	chr22	23464480	F	RSPH14	Body	opensea	-0.14569	0.024706
cg13393163	chr5	60586484	F	NA	IGR	opensea	-0.109808	0.0247189
cg04857054	chr15	90355385	R	ANPEP	5'UTR	shelf	0.141244	0.0247936
cg13104766	chr17	48933443	R	NA	IGR	opensea	-0.168774	0.0247936
cg10801405	chr7	140271458	R	DENND2A	Body	opensea	-0.102181	0.0247936
cg20417024	chr5	76028950	R	F2R	Body	opensea	-0.101553	0.0247936
cg22123245	chr16	13861170	R	NA	IGR	opensea	0.112711	0.0248418
cg19634247	chr12	54403314	F	HOXC8	1stExon	island	0.104359	0.0249485
cg23322640	chr6	111675295	R	REV3L	Body	opensea	-0.205183	0.0249485
cg17658118	chr7	137634052	R	CREB3L2	Body	opensea	-0.204235	0.0249485
cg25344239	chr1	68326786	F	NA	IGR	opensea	-0.145673	0.0249485
cg18338496	chr6	132778076	F	NA	IGR	opensea	-0.119346	0.0249485
cg22284796	chr17	3707364	F	NA	IGR	opensea	-0.11698	0.0249485
cg22977317	chr6	2842550	R	SERPINB1	TSS1500	shore	-0.160112	0.0250357
cg26574292	chr2	220287959	R	DES	Body	opensea	-0.136434	0.0250357
cg26973137	chr6	39666770	F	KIF6	Body	opensea	-0.132705	0.0250357
cg04641165	chr6	16139117	R	MYLIP	Body	opensea	-0.124181	0.0250357
cg04176043	chr16	4066142	F	ADCY9	Body	opensea	-0.176423	0.0250422
cg07082130	chr18	20911287	F	TMEM241	Body	opensea	-0.134479	0.0250817
cg01645179	chr15	80889374	R	ARNT2	3'UTR	opensea	-0.140934	0.0251751
cg25741597	chr3	147722622	F	NA	IGR	opensea	-0.158055	0.0252261
cg21591895	chr13	76334000	R	LMO7	TSS1500	opensea	-0.148283	0.0252281
cg03078046	chr1	230997859	R	C1orf198	Body	opensea	-0.200812	0.0252828
cg11637783	chr16	19594028	R	C16orf62	Body	opensea	-0.153632	0.0252828
cg15041443	chr2	28959354	F	NA	IGR	opensea	-0.216905	0.0255001
cg25715665	chr4	169967093	R	NA	IGR	opensea	-0.132853	0.0255001
cg08123626	chr9	108443806	R	NA	IGR	opensea	-0.104532	0.0256382
cg23693897	chr7	137637217	R	LOC100130880	TSS1500	opensea	-0.136297	0.0256423
cg18455946	chr1	221390578	R	NA	IGR	opensea	0.120361	0.0256973
cg13007502	chr2	208795771	F	PLEKHM3	Body	island	-0.169378	0.0256973
cg08121140	chr12	98985353	F	NA	IGR	shore	-0.121004	0.0257011
cg10956955	chr12	13194326	F	NA	IGR	shelf	-0.110045	0.0261336
cg06781316	chr7	41922091	R	NA	IGR	opensea	-0.176031	0.0261685
cg03695289	chr3	46027639	F	FYCO1	5'UTR	opensea	-0.183489	0.0262476
cg07190914	chr10	4500072	F	NA	IGR	opensea	-0.134326	0.0262476
cg03564061	chr12	2764355	R	CACNA1C	Body	opensea	-0.137624	0.026249
cg10545338	chr8	48556968	R	SPIDR	Body	opensea	-0.113859	0.0262609
cg09958776	chr18	32925302	F	ZNF24	TSS1500	shore	-0.151059	0.0262945
cg14331169	chr9	97591831	R	C9orf3	Body	opensea	-0.155707	0.0264552
cg17482227	chr13	111160844	R	COL4A2-AS1	TSS1500	shelf	-0.107874	0.0264552
cg25133685	chr6	29013336	F	OR2W1	TSS1500	opensea	0.121032	0.0264667
cg06033682	chr2	32361206	F	SPAST	Body	opensea	-0.194743	0.0264667
cg03195643	chr3	13938504	R	NA	IGR	shore	0.163439	0.026497
cg08002392	chr20	52394892	R	NA	IGR	opensea	-0.174736	0.026497
cg05229723	chr12	104526470	R	NFYB	Body	opensea	-0.150094	0.0265245
cg10428881	chr14	81770194	R	STON2	Body	opensea	-0.165518	0.0267212
cg06840243	chr17	74442338	F	UBE2O	Body	opensea	-0.196727	0.0268318
cg10714075	chr12	2716733	F	CACNA1C	Body	opensea	-0.122036	0.0268803
cg16978168	chr6	159227784	R	EZR	Body	opensea	-0.173795	0.0268871
cg06814654	chr14	54829779	F	NA	IGR	opensea	-0.144072	0.0268871
cg10480724	chr6	7240783	F	RREB1	Body	opensea	-0.101521	0.0268871
cg20209681	chr6	22568625	F	HDGFL1	TSS1500	shore	-0.149714	0.027008
cg21680327	chr1	36108225	R	PSMB2	TSS1500	shore	0.10275	0.0271069
cg03255006	chr3	13368093	F	NUP210	Body	opensea	0.253158	0.0271069
cg16175451	chr2	38120318	F	NA	IGR	opensea	-0.112469	0.0271069
cg17339118	chr20	2785313	R	NA	IGR	shelf	-0.132017	0.0271308
cg05470908	chr10	70998811	R	HKDC1	ExonBnd	opensea	-0.102062	0.0271308
cg15733367	chr3	57994941	F	FLNB	Body	island	0.10934	0.0271428
cg25395034	chr8	72753268	F	NA	IGR	shore	-0.143152	0.0271428
cg21480264	chr4	2137264	R	POLN	Body	opensea	-0.12107	0.0271428
cg22491627	chr4	148081961	F	NA	IGR	opensea	-0.10986	0.0271428
cg02344911	chr12	54403178	R	HOXC8	1stExon	island	0.124304	0.0271804
cg09951445	chr12	6419280	F	PLEKHG6	TSS1500	shore	-0.100347	0.0271887
cg17852791	chr17	49022312	R	NA	IGR	shore	-0.203935	0.0273175
cg00421363	chr19	49646246	F	PPFIA3	Body	island	0.137757	0.0274783
cg13104274	chr1	169078316	F	ATP1B1	Body	shore	-0.233402	0.0274783
cg07678623	chr8	48053580	F	NA	IGR	opensea	0.110056	0.0275283
cg02699135	chr16	10672284	F	EMP2	5'UTR	shore	-0.217394	0.0277523
cg04179553	chr9	97509002	F	C9orf3	5'UTR	opensea	-0.110737	0.0277523
cg25535954	chr3	122229927	R	KPNA1	5'UTR	shelf	-0.105395	0.0277523
cg20309703	chr11	118481025	R	PHLDB1	5'UTR	island	0.203553	0.0281645
cg20187173	chr3	177370839	R	NA	IGR	opensea	-0.237129	0.0282105
cg00748492	chr10	22216446	F	DNAJC1	Body	opensea	-0.143449	0.0282105
cg21190228	chr2	240132342	R	HDAC4	Body	opensea	-0.105322	0.0282105
cg20107668	chr13	113624471	F	MCF2L	Body	shore	0.118663	0.0283888
cg13843637	chr7	30930239	F	FAM188B	Body	opensea	-0.130142	0.0283888
cg03253555	chr5	154222942	F	FAXDC2	5'UTR	opensea	-0.100906	0.0283888
cg07020690	chr15	92057672	R	NA	IGR	opensea	-0.21068	0.0283918
cg05338912	chr6	150004720	F	LATS1	Body	opensea	-0.170074	0.0283918
cg17021528	chr13	26262515	F	ATP8A2	Body	opensea	-0.107393	0.0284997
cg11365124	chr1	27846026	F	NA	IGR	opensea	-0.166788	0.0286478
cg22883712	chr20	6015349	F	CRLS1	Body	opensea	-0.195887	0.0289367
cg21953891	chr5	168271855	F	SLIT3	Body	opensea	-0.1623	0.0289367
cg20950546	chr12	1917711	R	CACNA2D4	Body	opensea	-0.114002	0.0289367
cg05834195	chr15	78438748	R	NA	IGR	shelf	-0.124634	0.028942
cg24871922	chr8	48556931	F	SPIDR	Body	opensea	-0.168305	0.0289421
cg24964796	chr11	120411816	F	NA	IGR	opensea	-0.167417	0.0289421
cg17842382	chr6	122726813	R	HSF2	Body	opensea	-0.118042	0.0289421
cg19664446	chr17	70266606	F	NA	IGR	opensea	0.258225	0.0289747
cg25598203	chr10	53870395	R	PRKG1	Body	opensea	-0.118269	0.0289747
cg24016523	chr12	117418384	R	LOC100506551	Body	opensea	-0.154564	0.0290152
cg06549686	chr12	127174254	R	LOC100996671	Body	opensea	0.151658	0.0291831
cg09460267	chr15	37190927	F	MEIS2	Body	opensea	-0.1416	0.0292537
cg02299497	chr14	69095570	F	NA	IGR	shore	-0.180104	0.0293063
cg15478863	chr16	68125932	F	NFATC3	Body	opensea	-0.173499	0.0293506
cg11923446	chr3	135916562	F	NA	IGR	shore	-0.190792	0.029458
cg15732208	chr6	109493504	F	NA	IGR	opensea	-0.148483	0.029458
cg07661872	chr18	9811155	F	RAB31	Body	opensea	-0.107073	0.029458
cg09477541	chr15	58724985	F	LIPC	Body	opensea	-0.219278	0.0294627
cg15035956	chr7	55517538	F	NA	IGR	shore	-0.10731	0.0294627
cg24242670	chr5	178807737	F	NA	IGR	opensea	-0.126152	0.0294763
cg04067341	chr13	111160707	F	COL4A2-AS1	TSS200	shelf	-0.111519	0.0295445
cg00532885	chr9	97848222	R	MIR24-1	TSS200	island	-0.167381	0.0295888
cg16833030	chr6	12034949	R	HIVEP1	Body	opensea	-0.102148	0.0295888
cg14781855	chr9	16321085	F	NA	IGR	opensea	-0.144507	0.0297425
cg00348168	chr19	30196030	R	C19orf12	Body	opensea	-0.134716	0.0299507
cg18594033	chr10	112524504	F	RBM20	Body	opensea	-0.155382	0.0299695
cg10501870	chr6	30973556	F	MUC22	TSS200	opensea	-0.121226	0.0299695
cg17164513	chr19	2064075	R	NA	IGR	shore	-0.115484	0.0299695
cg00436874	chr19	8658985	R	ADAMTS10	Body	shore	-0.10955	0.0299695
cg15556723	chr3	71247394	R	FOXP1	Body	opensea	-0.150951	0.0299715
cg07323711	chr12	76942364	F	OSBPL8	5'UTR	opensea	-0.173384	0.0300658
cg22621390	chr6	25191716	F	NA	IGR	opensea	-0.137879	0.0301901
cg05402891	chr14	96152661	F	TCL1B	TSS200	opensea	0.120898	0.0302156
cg04685325	chr6	107087962	F	QRSL1	Body	opensea	-0.144236	0.0302786
cg02704413	chr5	151067918	F	SPARC	TSS1500	opensea	-0.128856	0.0304319
cg14444719	chr6	106244144	R	NA	IGR	opensea	-0.182649	0.0305425
cg15750809	chr10	129732542	R	PTPRE	5'UTR	opensea	-0.115693	0.0307265
cg13749113	chr15	24506388	R	NA	IGR	island	-0.256593	0.0308804
cg12809098	chr8	142165310	F	DENND3	Body	opensea	-0.1719	0.0308804
cg05624930	chr6	52172005	F	NA	IGR	island	-0.155818	0.0308804
cg24923931	chr19	40904691	R	PRX	Body	island	-0.150142	0.0308804
cg18406064	chr2	1623990	F	NA	IGR	opensea	-0.14632	0.0308804
cg15941598	chr3	101533864	F	NXPE3	Body	opensea	-0.142564	0.0308804
cg08866865	chr2	201173897	F	SPATS2L	5'UTR	shore	-0.140826	0.0308804
cg04558424	chr16	85743497	F	C16orf74	Body	island	-0.121531	0.0308804
cg10888830	chr7	137556243	F	NA	IGR	opensea	-0.101629	0.0308804
cg11067696	chr12	132328378	F	MMP17	Body	shore	-0.106953	0.0308867
cg08845722	chr2	46041801	F	PRKCE	Body	opensea	0.193823	0.0310276
cg14505131	chr8	23405208	F	SLC25A37	Body	opensea	-0.175425	0.0310276
cg02682369	chr5	131770741	R	C5orf56	Body	opensea	-0.152568	0.0310276
cg07755776	chr6	85232522	R	NA	IGR	opensea	-0.149206	0.0310276
cg05700704	chr6	140210113	F	NA	IGR	opensea	-0.143327	0.0310276
cg13177058	chr18	71917724	R	NA	IGR	opensea	-0.141468	0.0310276
cg10009719	chr9	133847231	R	NA	IGR	opensea	-0.127705	0.0310276
cg14567877	chr3	123071300	R	ADCY5	Body	opensea	-0.117883	0.0310276
cg04922955	chr1	40423553	R	MFSD2A	5'UTR	shelf	-0.165689	0.0310762
cg20048260	chr13	110802968	F	COL4A1	Body	opensea	-0.135915	0.0313697
cg19405124	chr17	47688746	F	SPOP	Body	opensea	-0.198241	0.0314665
cg03409300	chr8	143096581	R	NA	IGR	opensea	0.119657	0.0315613
cg20403557	chr5	115299088	F	LVRN	Body	island	-0.230456	0.0315613
cg14716166	chr15	41548858	F	CHP1	Body	opensea	-0.195788	0.0315613
cg18284575	chr14	69095594	F	NA	IGR	shore	-0.187047	0.0315613
cg23588378	chr8	12614674	R	NA	IGR	shore	-0.173373	0.0315613
cg08913015	chr1	54849293	R	SSBP3	Body	opensea	-0.128891	0.0315613
cg04046473	chr5	178670078	F	ADAMTS2	Body	opensea	-0.124744	0.0315613
cg07235562	chr10	14613892	F	FAM107B	1stExon	opensea	-0.113696	0.0315613
cg14546115	chr6	20817980	F	CDKAL1	Body	opensea	-0.111317	0.0315613
cg05607742	chr3	98674154	R	NA	IGR	opensea	0.287271	0.0316267
cg07981168	chr10	30843575	R	NA	IGR	opensea	-0.224782	0.0316622
cg05637092	chr7	610887	F	PRKAR1B	Body	island	-0.148971	0.0316622
cg03703839	chr16	87990084	R	BANP	5'UTR	shore	0.118003	0.0319616
cg21968413	chr2	40575923	F	SLC8A1	Body	opensea	-0.158843	0.0319616
cg00420348	chr11	830190	R	EFCAB4A	Body	island	0.121892	0.0319953
cg00389547	chr11	101897185	F	NA	IGR	opensea	-0.170667	0.0319953
cg08482917	chr8	9006276	F	PPP1R3B	5'UTR	shore	-0.133672	0.0319953
cg07975356	chr9	97847416	R	MIR27B	TSS1500	shore	-0.12544	0.0319953
cg12384923	chr12	51013191	R	DIP2B	Body	opensea	-0.235227	0.0320076
cg18388274	chr13	74352882	F	KLF12	Body	opensea	-0.154041	0.0320076
cg08830379	chr12	81110208	R	MYF5	TSS1500	shore	-0.160515	0.0321466
cg27630316	chr10	99331614	F	ANKRD2	TSS1500	shore	-0.118607	0.0321466
cg21030186	chr12	22403744	F	ST8SIA1	Body	opensea	-0.143196	0.0321941
cg03260624	chr1	91970722	F	CDC7	Body	shelf	-0.10387	0.0321941
cg25586977	chr18	73107224	F	NA	IGR	opensea	-0.137618	0.0322148
cg13470735	chr1	156678548	F	NA	IGR	shore	0.159027	0.0324382
cg08535003	chr10	93390512	F	PPP1R3C	Body	shelf	-0.172478	0.0324382
cg20106370	chr12	70088037	F	BEST3	Body	opensea	-0.154242	0.0324382
cg06033488	chr3	71057560	F	FOXP1	Body	opensea	-0.138794	0.0325304
cg22484566	chr12	129305480	F	SLC15A4	Body	shelf	-0.163025	0.0325595
cg02990330	chr1	43751504	F	C1orf210	TSS1500	opensea	-0.124696	0.0325926
cg20983084	chr20	44556201	F	NA	IGR	opensea	-0.112752	0.0325967
cg09706368	chr6	148639226	R	NA	IGR	opensea	-0.102872	0.0325967
cg15492738	chr12	309152	R	SLC6A12	Body	shelf	0.105065	0.0327614
cg15848231	chr20	55616192	R	NA	IGR	opensea	0.121435	0.0327614
cg16445728	chr1	89919312	F	NA	IGR	opensea	-0.135502	0.0327614
cg23387863	chr15	77472416	F	SGK269	Body	opensea	-0.113136	0.0327939
cg14816908	chr9	139357513	F	SEC16A	Body	shelf	-0.118577	0.0329012
cg22289785	chr4	48496404	F	ZAR1	3'UTR	shelf	-0.183815	0.0332704
cg02216394	chr6	30178715	F	TRIM26	5'UTR	shelf	-0.121207	0.0332812
cg04569152	chr14	21555603	F	FLJ10357	Body	shelf	0.110565	0.0333514
cg00833893	chr5	10434669	R	2006-03-01	3'UTR	opensea	-0.181637	0.0333514
cg11479568	chr8	41522951	R	ANK1	TSS200	opensea	-0.125057	0.0333514
cg24363824	chr6	30713026	F	IER3	TSS1500	shore	-0.120616	0.0333514
cg15536925	chr16	54115540	F	FTO	Body	opensea	-0.113761	0.0333514
cg27080361	chr5	149447589	R	CSF1R	Body	opensea	-0.113398	0.0333514
cg05632838	chr8	48557033	R	SPIDR	Body	opensea	-0.159194	0.0334065
cg14315508	chr22	31976162	R	SFI1	Body	opensea	-0.104318	0.0336315
cg13816228	chr1	90022780	R	LRRC8B	TSS1500	opensea	-0.176976	0.0337405
cg01741150	chr1	87824921	R	LINC01364	Body	opensea	-0.120227	0.0338537
cg06851122	chr12	13270896	R	NA	IGR	opensea	-0.12057	0.0343816
cg14290908	chr16	75124751	F	ZNRF1	Body	opensea	-0.109494	0.0344339
cg15748637	chr8	101316245	R	RNF19A	TSS1500	opensea	-0.118786	0.034458
cg02668949	chr11	926768	R	AP2A2	Body	shore	0.132241	0.0345112
cg11883836	chr3	156838181	R	NA	IGR	island	-0.160658	0.0345112
cg18838975	chr9	112866208	R	PALM2-AKAP2	Body	opensea	-0.152849	0.0345112
cg16297171	chr8	99017690	F	MATN2	Body	opensea	-0.151854	0.0345112
cg03047070	chr12	2787827	R	CACNA1C	Body	shore	-0.148698	0.0345112
cg12448539	chr1	95364293	F	CNN3	Body	opensea	-0.139956	0.0345112
cg18636023	chr19	54985362	R	CDC42EP5	TSS1500	shelf	-0.136724	0.0345112
cg25977938	chr1	99432192	F	LPPR5	Body	opensea	-0.136085	0.0345112
cg10130187	chr4	16766526	R	LDB2	Body	opensea	-0.123033	0.0345112
cg20863651	chr11	2411223	R	CD81	5'UTR	opensea	-0.107312	0.0345112
cg25341268	chr2	37734390	F	NA	IGR	opensea	-0.206549	0.0345403
cg18395736	chr21	40317711	F	NA	IGR	opensea	-0.194952	0.0345403
cg18038250	chr2	208091665	F	LOC101927865	Body	opensea	-0.186686	0.0345403
cg18678492	chr11	10394979	R	CAND1.11	Body	opensea	-0.171087	0.0345403
cg27088038	chr14	92959927	R	SLC24A4	Body	opensea	-0.121716	0.0345403
cg07880753	chr4	25951016	F	NA	IGR	opensea	-0.147613	0.0346169
cg00038450	chr8	42135385	R	IKBKB	Body	opensea	-0.136028	0.0346169
cg09884613	chr11	66085453	R	CD248	TSS1500	shore	0.127695	0.0351391
cg06322356	chr20	1490029	F	NA	IGR	opensea	0.170291	0.0351391
cg12073979	chr12	2299176	R	CACNA1C	Body	opensea	-0.184092	0.0351391
cg08423575	chr1	22826800	F	ZBTB40	Body	opensea	-0.163652	0.0351391
cg21750659	chr8	119045287	F	EXT1	Body	opensea	-0.122828	0.0351391
cg01867004	chr22	30669425	F	NA	IGR	opensea	-0.122117	0.0351391
cg16648740	chr3	23362864	F	UBE2E2	Body	opensea	-0.102552	0.0351391
cg20273372	chr22	35986873	F	NA	IGR	opensea	-0.101833	0.0351391
cg07044458	chr7	4751984	F	FOXK1	Body	opensea	-0.145982	0.0352454
cg02363168	chr2	159851760	F	TANC1	5'UTR	opensea	-0.172693	0.0353105
cg17031357	chr5	78760281	F	HOMER1	Body	opensea	-0.172431	0.0353105
cg08843968	chr12	112792319	R	HECTD4	5'UTR	opensea	-0.141276	0.0353347
cg24716193	chr8	128333484	R	CASC21	Body	opensea	-0.184315	0.0354212
cg05725666	chr12	2224644	F	CACNA1C	Body	island	-0.135304	0.0355292
cg12994147	chr10	119301038	F	EMX2	TSS1500	shore	0.168089	0.0357539
cg09131500	chr13	47161427	F	LRCH1	Body	opensea	-0.206646	0.0357539
cg20490175	chr12	2797745	F	CACNA1C	Body	shelf	-0.11754	0.0357539
cg27333419	chr10	15405259	F	FAM171A1	Body	opensea	-0.103009	0.0357539
cg05789250	chr6	31804306	F	C6orf48	5'UTR	shore	0.111913	0.0359979
cg02946675	chr12	123956471	R	RILPL1	3'UTR	opensea	-0.194426	0.0362174
cg26385612	chr12	2645488	R	CACNA1C	Body	opensea	-0.142215	0.0362174
cg20099461	chr12	51718966	F	BIN2	TSS1500	opensea	-0.125879	0.0362174
cg18755544	chr5	33339102	F	NA	IGR	opensea	-0.106067	0.0362174
cg15073453	chr11	126855201	F	KIRREL3	Body	opensea	-0.115222	0.0362381
cg15696968	chr6	30656070	R	KIAA1949	TSS1500	shore	0.15659	0.0362743
cg25555781	chr2	238591946	F	LRRFIP1	Body	opensea	-0.195678	0.0362743
cg27140216	chr10	14612432	F	FAM107B	5'UTR	opensea	-0.16959	0.0362743
cg23507796	chr18	55926108	R	NEDD4L	5'UTR	shelf	-0.147051	0.0362743
cg12435059	chr3	37291314	F	GOLGA4	Body	opensea	-0.131854	0.0362743
cg16922384	chr15	44037490	F	CATSPER2P1	Body	shore	-0.123131	0.0362743
cg04448477	chr4	55095148	R	PDGFRA	TSS200	shore	0.15352	0.036286
cg25318785	chr13	111127601	R	COL4A2	Body	opensea	-0.107663	0.036286
cg24996979	chr14	74223355	F	C14orf43	5'UTR	shelf	0.112383	0.0364091
cg12480689	chr1	207238217	R	PFKFB2	Body	opensea	-0.141862	0.0366466
cg23399282	chr18	60173291	F	NA	IGR	opensea	-0.119141	0.0366466
cg11879902	chr12	2697745	F	CACNA1C	Body	opensea	-0.114802	0.0366466
cg21766218	chr11	36316722	R	PRR5L	TSS1500	opensea	-0.111374	0.0366466
cg09203857	chr4	127715813	R	NA	IGR	opensea	-0.151756	0.0367457
cg13119097	chr17	74226642	R	RNF157	Body	shelf	-0.127197	0.0367457
cg18726757	chr13	99625754	R	DOCK9	Body	opensea	-0.158393	0.0368349
cg05257315	chr1	167791511	F	ADCY10	Body	shore	-0.145239	0.0368349
cg03970032	chr1	16062915	F	SLC25A34	5'UTR	opensea	-0.135904	0.0368349
cg10651391	chr5	112232370	R	REEP5	Body	opensea	-0.105528	0.0368349
cg12439423	chr8	41522721	R	ANK1	Body	opensea	-0.150335	0.0368355
cg07458272	chr19	34744396	R	KIAA0355	TSS1500	shore	-0.10988	0.0368355
cg00412189	chr6	3826886	R	NA	IGR	opensea	-0.172815	0.036844
cg09813248	chr12	121164194	F	ACADS	Body	shore	-0.115474	0.0369654
cg01835580	chr14	21511501	F	RNASE7	Body	opensea	-0.157109	0.0370425
cg09406842	chr1	46391593	R	MAST2	Body	opensea	-0.129636	0.0370562
cg02772607	chr15	67840376	R	MAP2K5	TSS1500	opensea	0.168831	0.0370868
cg26540167	chr12	66035973	R	LOC100507065	Body	opensea	-0.100423	0.0371019
cg12298832	chr3	11701933	F	VGLL4	Body	opensea	-0.185462	0.037228
cg04067992	chr13	110965424	R	COL4A2	Body	shore	-0.133678	0.0372971
cg21967909	chr5	94982211	F	RFESD	TSS1500	shore	-0.12986	0.0372971
cg24772652	chr5	71732838	F	NA	IGR	opensea	-0.153377	0.0374477
cg02851873	chr10	80907003	R	ZMIZ1	5'UTR	opensea	-0.153167	0.037532
cg02994093	chr15	53327213	R	NA	IGR	opensea	-0.160787	0.0375521
cg15811371	chr19	9093198	R	MUC16	TSS1500	opensea	0.101152	0.0376375
cg00793636	chr1	183430957	F	SMG7-AS1	Body	opensea	-0.203197	0.0376375
cg08314300	chr2	162278173	R	TBR1	Body	shore	-0.184113	0.0376375
cg11570286	chr7	82385343	F	PCLO	3'UTR	opensea	-0.152702	0.0376375
cg05779950	chr15	90936954	R	IQGAP1	Body	opensea	-0.148588	0.0376375
cg20611650	chr9	140583193	R	EHMT1	Body	opensea	-0.125283	0.0376375
cg24933152	chr2	234372892	R	DGKD	Body	shelf	-0.1292	0.0378459
cg06016699	chr1	18337380	F	NA	IGR	opensea	0.148246	0.0378618
cg00122739	chr8	22402759	R	NA	IGR	opensea	-0.126522	0.0381255
cg04073358	chr11	9990832	R	SBF2	Body	opensea	-0.201054	0.0381349
cg24650120	chr7	150096722	R	NA	IGR	shore	-0.132837	0.0381587
cg06917697	chr6	114352289	F	LOC101927768	Body	opensea	-0.126213	0.038253
cg24043604	chr12	2613948	F	CACNA1C	Body	opensea	-0.112634	0.0382995
cg01100322	chr12	96042879	F	NA	IGR	opensea	-0.18938	0.0383185
cg18264933	chr10	126407067	F	FAM53B	5'UTR	opensea	-0.186669	0.0383185
cg14385804	chr2	228212054	R	MFF	Body	opensea	-0.125522	0.0383185
cg01040749	chr10	134400440	R	INPP5A	Body	opensea	-0.134736	0.0384134
cg21831463	chr7	132372840	R	NA	IGR	opensea	0.125071	0.0385025
cg10265016	chr2	18061319	F	KCNS3	5'UTR	shore	-0.187908	0.0385336
cg19370858	chr4	85500716	F	NA	IGR	shelf	-0.144283	0.0385525
cg01466011	chr3	156837590	R	NA	IGR	shore	-0.103533	0.0385525
cg22450878	chr5	8843071	R	NA	IGR	opensea	-0.167844	0.0388875
cg14958141	chr19	38394114	F	WDR87	5'UTR	shelf	-0.13087	0.039017
cg03456560	chr4	4866192	R	NA	IGR	shore	-0.174009	0.0393354
cg19861914	chr13	76334039	F	LMO7	TSS1500	opensea	-0.157394	0.0395187
cg15644639	chr8	125538941	R	TATDN1	Body	opensea	-0.106387	0.039599
cg26246049	chr10	30843592	R	NA	IGR	opensea	-0.202903	0.0397567
cg08325568	chr1	202535243	F	PPP1R12B	Body	opensea	-0.17213	0.0397567
cg23657757	chr2	202318145	F	STRADB	5'UTR	shore	-0.139171	0.0397567
cg22668643	chr3	16945717	F	PLCL2	Body	opensea	-0.12203	0.0397567
cg13331542	chr19	54985364	R	CDC42EP5	TSS1500	shelf	-0.115747	0.0397567
cg13464573	chr2	7172097	F	RNF144A	Body	shore	-0.141585	0.0398105
cg24535130	chr17	79917287	R	NOTUM	Body	island	0.12331	0.0398599
cg27507413	chr8	17612669	F	MTUS1	Body	opensea	-0.19212	0.0398599
cg17074014	chr17	3704494	R	ITGAE	1stExon	opensea	-0.159684	0.0398599
cg07744832	chr12	100537267	F	UHRF1BP1L	TSS1500	shore	-0.105528	0.0398599
cg05098381	chr3	71301786	R	FOXP1	5'UTR	opensea	-0.146315	0.0400363
cg14815361	chr5	131589552	F	NA	IGR	shelf	-0.173055	0.0401811
cg05829718	chr2	202010386	R	CFLAR	5'UTR	opensea	-0.111437	0.0401811
cg22273744	chr4	95972614	R	BMPR1B	TSS1500	opensea	-0.217024	0.0402194
cg14065678	chr11	35940488	F	NA	IGR	opensea	-0.142463	0.0402283
cg22601067	chr3	177242259	F	LINC00578	Body	opensea	-0.13817	0.0402283
cg10374402	chr10	82300600	R	SH2D4B	Body	opensea	-0.224038	0.0402499
cg05942111	chr12	65044027	R	RASSF3	Body	opensea	-0.17321	0.0403004
cg13147662	chr2	32653492	R	BIRC6	Body	opensea	-0.213292	0.0404324
cg25343204	chr7	16841311	R	AGR2	Body	opensea	-0.127591	0.0404324
cg14111606	chr1	15326234	F	KAZN	Body	opensea	-0.119888	0.0404324
cg19669385	chr17	800263	F	NXN	Body	opensea	-0.239226	0.0404853
cg10328047	chr8	145024774	R	PLEC1	Body	island	0.115002	0.0404956
cg11656382	chr2	149406282	R	EPC2	Body	shelf	-0.188433	0.0406441
cg10452581	chr10	94180913	F	NA	IGR	shore	-0.147822	0.0407611
cg02075410	chr4	151504138	F	LRBA	Body	island	-0.138763	0.0407611
cg14312888	chr7	47644891	F	NA	IGR	opensea	-0.215492	0.0408
cg04391048	chr2	18766022	F	NT5C1B	Body	island	-0.104555	0.0408
cg27370104	chr6	42417938	R	TRERF1	5'UTR	shore	0.123891	0.0408885
cg17382918	chr20	57042544	R	APCDD1L	Body	island	-0.142593	0.0408885
cg10012337	chr9	36023810	R	NA	IGR	opensea	-0.142465	0.0409548
cg25581090	chr14	65009707	F	HSPA2	3'UTR	shore	-0.173267	0.0409877
cg17116034	chr2	242126996	R	ANO7	TSS1500	opensea	-0.170841	0.0409877
cg21862228	chr12	92500268	R	C12orf79	Body	opensea	-0.167163	0.0409877
cg08738516	chr10	126408016	R	FAM53B	5'UTR	opensea	-0.153143	0.0409877
cg03561416	chr6	157254584	F	ARID1B	Body	opensea	-0.136057	0.0409877
cg10884018	chr3	157019556	R	VEPH1	Body	opensea	-0.122225	0.0409877
cg21336300	chr12	25204332	R	LRMP	TSS1500	opensea	-0.187542	0.0411217
cg00321129	chr10	28598684	F	NA	IGR	opensea	0.139788	0.0411272
cg19208876	chr10	79093530	R	KCNMA1	Body	opensea	-0.212366	0.0411272
cg02138987	chr18	53074123	F	TCF4	Body	opensea	-0.184179	0.0411272
cg07059712	chr22	36576309	R	NA	IGR	opensea	-0.139686	0.0411272
cg24939380	chr4	84189574	F	COQ2	Body	opensea	-0.129252	0.0411272
cg08077055	chr11	124594678	F	NA	IGR	opensea	-0.123849	0.0412911
cg10241426	chr17	28558934	F	SLC6A4	5'UTR	shelf	-0.126426	0.0414195
cg04675040	chr15	93316104	R	NA	IGR	opensea	-0.107434	0.0414195
cg03940484	chr15	91768273	R	SV2B	5'UTR	opensea	0.100157	0.0414317
cg08421768	chr4	123797144	F	FGF2	Body	opensea	-0.139493	0.041457
cg00182712	chr5	43397617	F	CCL28	TSS1500	shore	-0.195328	0.0418303
cg21296676	chr6	133561660	F	EYA4	TSS1500	shore	-0.182171	0.0418303
cg19696870	chr17	17343875	F	NA	IGR	opensea	-0.165396	0.0418303
cg21425766	chr14	100737696	R	YY1	Body	opensea	-0.133923	0.0418303
cg23120725	chr15	50975608	R	TRPM7	Body	shelf	-0.107656	0.0418303
cg13926569	chr10	89418898	F	PAPSS2	TSS1500	shore	-0.104731	0.0418303
cg14361895	chr2	201182777	F	SPATS2L	5'UTR	opensea	-0.150993	0.0421887
cg11863380	chr5	95094981	R	RHOBTB3	Body	opensea	-0.135658	0.0422335
cg12516875	chr22	46463543	R	NA	IGR	shelf	0.114939	0.0423709
cg04676884	chr2	26707418	F	OTOF	Body	opensea	-0.156659	0.0423709
cg04191300	chr11	128729652	R	KCNJ1	5'UTR	opensea	-0.136573	0.0423709
cg08786136	chr16	89058615	R	NA	IGR	opensea	-0.109697	0.0423709
cg12907305	chr3	114132654	F	ZBTB20	Body	opensea	-0.133545	0.0425903
cg11308480	chr14	60737747	F	PPM1A	Body	opensea	-0.102659	0.0426763
cg16762118	chr8	94897218	R	NA	IGR	opensea	-0.1371	0.0426804
cg22655142	chr14	54095527	F	NA	IGR	opensea	0.140826	0.0426829
cg08201451	chr16	70760142	F	VAC14	Body	opensea	-0.171396	0.0426829
cg06669062	chr8	12954061	F	DLC1	Body	opensea	-0.131066	0.0426829
cg16380614	chr2	191874140	R	STAT1	Body	opensea	-0.10219	0.0426829
cg11544138	chr19	1003455	F	GRIN3B	Body	island	0.120785	0.0428487
cg07393105	chr7	66095842	R	KCTD7	Body	shore	-0.174498	0.0429492
cg16401770	chr7	112739805	F	NA	IGR	opensea	-0.171212	0.0429826
cg07607196	chr3	50388823	F	CYB561D2	5'UTR	shore	0.112225	0.0430755
cg03405260	chr17	77786344	F	NA	IGR	island	0.121283	0.0430755
cg18944014	chr2	239799440	F	TWIST2	3'UTR	opensea	-0.131772	0.0430755
cg22497575	chr13	45025622	F	TSC22D1	Body	opensea	-0.100594	0.0430755
cg00689629	chr2	1691363	F	PXDN	Body	opensea	-0.100537	0.0431765
cg07371151	chr13	110989764	R	COL4A2	Body	opensea	-0.190181	0.0433337
cg18609883	chr3	159562624	R	SCHIP1	Body	opensea	-0.179801	0.0433337
cg06991584	chr1	150104847	F	VPS45	Body	opensea	-0.109003	0.0433604
cg08919235	chr7	155811336	R	NA	IGR	opensea	0.193865	0.0435196
cg16700555	chr19	29700860	R	UQCRFS1	Body	shelf	-0.120694	0.0435268
cg21902984	chr12	117651051	F	NOS1	3'UTR	opensea	0.165197	0.0435612
cg10724894	chr5	38608617	F	LIFR-AS1	Body	opensea	-0.176652	0.0435612
cg14595291	chr11	35993855	F	LDLRAD3	5'UTR	opensea	-0.123506	0.0435612
cg17663186	chr4	37689073	R	RELL1	TSS1500	shore	-0.16758	0.0436299
cg09042450	chr2	1647135	F	PXDN	ExonBnd	opensea	-0.126614	0.0436299
cg22134757	chr8	22723825	F	PEBP4	Body	shore	-0.101028	0.0436299
cg08574903	chr22	40849033	F	MKL1	Body	opensea	-0.100682	0.0436299
cg17916948	chr9	112906058	R	AKAP2	Body	opensea	-0.291309	0.0436593
cg03337918	chr8	96148290	R	PLEKHF2	5'UTR	shore	-0.138041	0.0436593
cg22052672	chr2	74663416	R	RTKN	Body	island	-0.121812	0.0436593
cg23068476	chr12	2613703	R	CACNA1C	Body	opensea	-0.125798	0.0438122
cg22909085	chr2	223765655	R	ACSL3	5'UTR	opensea	-0.131263	0.0438383
cg10326379	chr6	134125770	F	TARID	Body	opensea	-0.191101	0.0438439
cg12362118	chr3	148995174	F	NA	IGR	opensea	-0.185971	0.0439369
cg26942031	chr6	163912396	R	QKI	Body	opensea	-0.215038	0.0439496
cg14788224	chr2	19302742	R	NA	IGR	opensea	-0.130612	0.0439496
cg07142610	chr11	75100125	R	NA	IGR	opensea	-0.103262	0.0439496
cg10613567	chr13	23950128	R	SACS	TSS1500	shore	-0.197039	0.0439752
cg15497249	chr1	239485905	F	NA	IGR	opensea	-0.167901	0.0439752
cg18635278	chr3	53165712	F	RFT1	TSS1500	shore	-0.159845	0.0439752
cg18816701	chr12	2800055	R	CACNA1C	Body	shore	-0.182166	0.0439927
cg01227572	chr5	155106467	R	NA	IGR	shore	0.164806	0.0440376
cg18573345	chr2	239637975	R	NA	IGR	opensea	0.116777	0.0440601
cg10423023	chr8	6414796	R	ANGPT2	Body	opensea	-0.113167	0.0440601
cg09861673	chr16	53967656	F	FTO	Body	opensea	-0.111922	0.0440874
cg12647955	chr11	12727674	F	TEAD1	5'UTR	opensea	-0.106095	0.0441738
cg12959398	chr3	142573120	F	PCOLCE2	Body	opensea	-0.180529	0.0442249
cg11788263	chr10	86257959	F	CCSER2	Body	opensea	-0.166508	0.0442249
cg09389557	chr2	1689803	F	PXDN	Body	opensea	-0.166386	0.0442249
cg20127102	chr11	57197699	R	NA	IGR	shelf	-0.14024	0.0442249
cg00542261	chr10	71121415	R	HK1	Body	opensea	-0.136874	0.0442249
cg14500070	chr3	141119541	R	ZBTB38	5'UTR	shore	-0.120233	0.0442249
cg07082144	chr2	171997946	R	TLK1	5'UTR	opensea	-0.109366	0.0442249
cg07366916	chr19	52239543	F	NA	IGR	opensea	0.143436	0.044289
cg00278211	chr12	2269220	R	CACNA1C	Body	opensea	-0.157774	0.044289
cg10676327	chr4	6659735	R	NA	IGR	island	-0.107648	0.0444825
cg12809365	chr8	72754272	F	MSC	3'UTR	island	-0.161402	0.0446384
cg07190763	chr13	114894582	R	RASA3	Body	shelf	0.106589	0.0447739
cg14749662	chr17	74442367	F	UBE2O	Body	opensea	-0.178421	0.0447739
cg20506240	chr4	142023809	R	RNF150	Body	opensea	-0.127748	0.0448248
cg24035595	chr8	1613877	R	DLGAP2	Body	shelf	-0.114799	0.0448248
cg11340527	chr11	58953689	R	DTX4	Body	opensea	-0.112631	0.0448248
cg19607663	chr11	130761158	F	SNX19	Body	opensea	-0.109281	0.0448248
cg26907302	chr10	127464488	R	MMP21	TSS200	shore	-0.100214	0.0448248
cg20061971	chr17	40851109	R	CNTNAP1	3'UTR	opensea	0.131712	0.0448858
cg11911286	chr2	109177239	F	NA	IGR	opensea	-0.180417	0.0449221
cg26875135	chr7	1221192	R	NA	IGR	opensea	0.106396	0.0450019
cg14883070	chr18	12646025	R	SPIRE1	5'UTR	opensea	-0.157718	0.0450019
cg20697818	chr7	33225797	F	BBS9	Body	opensea	-0.108627	0.0450431
cg10740486	chr12	26270399	R	NA	IGR	shelf	-0.186778	0.0450592
cg04583448	chr8	97865872	F	CPQ	Body	opensea	-0.177667	0.0450592
cg14932715	chr11	57084996	F	TNKS1BP1	Body	opensea	-0.134973	0.0450592
cg05483233	chr9	116065632	R	NA	IGR	opensea	-0.129466	0.0450592
cg24556770	chr5	125706335	R	GRAMD3	Body	opensea	-0.112242	0.0450592
cg00910029	chr2	242699048	R	D2HGDH	Body	opensea	-0.105893	0.0450592
cg00388154	chr15	68498857	R	CALML4	TSS1500	opensea	-0.103385	0.0452934
cg16630979	chr15	70979982	R	UACA	ExonBnd	opensea	-0.146501	0.0454325
cg08960448	chr16	4838658	R	2012-09-01	TSS1500	opensea	-0.222746	0.0455073
cg14200851	chr7	106102409	F	NA	IGR	opensea	-0.104668	0.0455633
cg09374346	chr15	78835713	F	PSMA4	5'UTR	shelf	-0.117949	0.0459429
cg26013796	chr12	46948457	F	NA	IGR	opensea	0.220877	0.0459843
cg16305792	chr12	48102139	F	NA	IGR	shelf	-0.116797	0.0461019
cg04452766	chr6	151475884	R	NA	IGR	opensea	-0.192478	0.0461306
cg23294290	chr9	138605133	F	KCNT1	Body	shore	0.101567	0.0461447
cg05270710	chr9	74600025	R	NA	IGR	opensea	-0.10784	0.0461997
cg15548966	chr4	13930102	F	LINC01182	Body	opensea	-0.14457	0.0462442
cg24485234	chr17	4753965	R	MINK1	Body	opensea	-0.133435	0.046331
cg16533864	chr9	96267020	F	FAM120A	Body	opensea	-0.109963	0.0463452
cg05863405	chr1	163131018	F	LOC101928404	TSS1500	opensea	-0.130774	0.0463563
cg00740822	chr19	49939611	R	SLC17A7	Body	island	-0.19183	0.0464368
cg19151852	chr17	79938611	F	ASPSCR1	Body	shelf	-0.127093	0.0464368
cg11498860	chr12	50092193	R	FMNL3	Body	opensea	-0.124345	0.0464368
cg03680322	chr11	44606558	F	CD82	5'UTR	opensea	-0.170822	0.0464493
cg26792295	chr3	16540091	F	RFTN1	5'UTR	opensea	-0.118009	0.0464493
cg13627691	chr5	32574980	R	NA	IGR	opensea	-0.112255	0.0464493
cg10055412	chr12	66034540	F	LOC100507065	Body	opensea	0.19246	0.0467165
cg21948170	chr20	30258942	F	BCL2L1	Body	opensea	-0.14548	0.0467165
cg21150288	chr7	612458	F	PRKAR1B	Body	shore	-0.191045	0.0467255
cg11823151	chr16	1320557	R	NA	IGR	opensea	-0.152628	0.0467549
cg09417725	chr18	67978175	F	SOCS6	5'UTR	opensea	-0.100404	0.0467549
cg10987347	chr1	12559783	F	VPS13D	Body	opensea	0.21101	0.0468164
cg18817020	chr7	34299887	R	NA	IGR	opensea	0.236418	0.0468752
cg03601895	chr12	120154779	F	CIT	Body	opensea	-0.20115	0.0468752
cg17522445	chr19	48675153	R	NA	IGR	island	-0.16097	0.0468752
cg09841972	chr13	76337398	R	LMO7	5'UTR	opensea	-0.159456	0.0468752
cg10153341	chr6	119665694	F	MAN1A1	Body	shelf	-0.151702	0.0468752
cg01888131	chr6	91247068	R	MAP3K7	Body	opensea	-0.144899	0.0468752
cg02332932	chr10	74607702	R	MCU	Body	opensea	-0.123039	0.0468752
cg04697598	chr15	37048064	F	C15orf41	Body	opensea	-0.119428	0.0468752
cg02057311	chr2	237144107	F	ASB18	Body	shore	-0.140505	0.0469235
cg20861092	chr16	46860772	R	C16orf87	Body	shelf	-0.136539	0.0469235
cg17889882	chr16	22029124	F	C16orf52	Body	opensea	-0.175955	0.047186
cg03840678	chr16	69975320	F	WWP2	3'UTR	opensea	-0.105806	0.047186
cg04939902	chr19	47660875	R	SAE1	Body	opensea	-0.159592	0.0473123
cg06222007	chr9	33934053	F	UBAP2	1stExon	opensea	-0.108653	0.0473401
cg11794753	chr16	4163838	F	ADCY9	Body	shore	-0.17481	0.0473503
cg04197844	chr6	64556166	R	EYS	Body	opensea	-0.217055	0.0475001
cg05115460	chr19	47404944	R	NA	IGR	opensea	-0.157507	0.0475001
cg08817764	chr9	97857620	R	NA	IGR	opensea	-0.140656	0.0475151
cg25629547	chr15	58621998	F	NA	IGR	opensea	-0.120646	0.0475151
cg20553577	chr13	111128071	F	COL4A2	Body	opensea	-0.114113	0.0475151
cg08320082	chr5	142889494	F	NA	IGR	opensea	-0.105778	0.0475206
cg02531924	chr5	1522816	R	LPCAT1	Body	shore	0.123861	0.0476473
cg05825660	chr8	50787456	F	NA	IGR	opensea	0.108574	0.0476551
cg17782167	chr10	95812772	R	PLCE1	Body	opensea	0.221556	0.0476551
cg09369939	chr2	47629162	F	MSH2	TSS1500	shore	-0.11365	0.0476551
cg17446528	chr6	7154703	F	RREB1	5'UTR	opensea	-0.10729	0.0478294
cg22117578	chr21	46918932	F	COL18A1	Body	shore	-0.100124	0.0478294
cg08219700	chr8	58056026	R	NA	IGR	island	-0.184253	0.0478831
cg04320984	chr12	50396859	F	RACGAP1	Body	opensea	-0.12848	0.0478831
cg13735193	chr6	27923762	R	OR2B6	TSS1500	opensea	0.157442	0.047919
cg14976967	chr2	64090054	F	UGP2	Body	opensea	-0.161512	0.047919
cg14495753	chr3	134197092	F	ANAPC13	Body	opensea	-0.140913	0.047919
cg26755173	chr11	123395568	R	GRAMD1B	TSS1500	opensea	-0.11634	0.047919
cg01834541	chr1	10651801	F	PEX14	Body	opensea	-0.103305	0.047919
cg06223834	chr16	4103161	R	ADCY9	Body	opensea	-0.270684	0.0479881
cg22582999	chr8	134594669	R	NA	IGR	opensea	-0.162347	0.0479881
cg02246876	chr14	23586582	F	CEBPE	3'UTR	opensea	-0.129765	0.04802
cg02205401	chr4	83803759	F	SEC31A	5'UTR	opensea	-0.191041	0.0480941
cg08725325	chr9	7104070	F	KDM4C	Body	opensea	-0.149444	0.0480941
cg03995300	chr17	5019989	F	ZNF232	5'UTR	shore	-0.170086	0.048131
cg07052737	chr2	26224428	R	NA	IGR	opensea	-0.162716	0.048131
cg23527385	chr3	71247723	R	FOXP1	5'UTR	opensea	-0.147551	0.048131
cg14784779	chr6	25264079	F	NA	IGR	opensea	0.163945	0.0482413
cg14278774	chr4	159733522	F	FNIP2	Body	opensea	-0.114667	0.0482827
cg05840754	chr19	45619377	R	PPP1R37	Body	opensea	-0.155918	0.0483219
cg05537706	chr2	46453098	F	NA	IGR	opensea	-0.258601	0.0484188
cg24001138	chr9	33418352	F	NA	IGR	opensea	-0.10204	0.0486884
cg01497434	chr4	7646087	F	SORCS2	Body	shore	-0.138005	0.0487494
cg03050884	chr1	115293662	F	CSDE1	5'UTR	opensea	-0.160199	0.0487838
cg13472456	chr15	66942574	R	LINC01169	Body	opensea	-0.145021	0.048898
cg19717347	chr12	129304956	R	SLC15A4	Body	shelf	-0.125517	0.0489752
cg10501263	chr1	52437503	F	RAB3B	Body	opensea	-0.161876	0.0490176
cg05916700	chr12	93130344	R	PLEKHG7	1stExon	opensea	-0.145991	0.0490176
cg25049844	chr21	46933374	F	COL18A1	3'UTR	shore	-0.104882	0.0490176
cg12918270	chr13	23950416	F	SACS	TSS1500	shore	-0.180354	0.0490508
cg20339720	chr22	45072491	R	PRR5	5'UTR	opensea	-0.166775	0.0490508
cg13783924	chr9	103278557	F	MSANTD3-TMEFF1	Body	opensea	-0.148774	0.0490508
cg08346795	chr10	30895525	R	NA	IGR	opensea	-0.144427	0.0490508
cg10300154	chr5	7870577	F	MTRR	Body	shore	-0.13525	0.0490508
cg09833862	chr9	114219086	R	KIAA0368	Body	opensea	-0.132108	0.0490508
cg22974337	chr7	33830608	F	NA	IGR	opensea	-0.10663	0.0490508
cg17342301	chr14	59828522	F	DAAM1	Body	opensea	-0.168197	0.0491373
cg21598040	chr2	113597613	R	NA	IGR	opensea	-0.153634	0.0491373
cg05877565	chr7	41732947	F	INHBA	Body	opensea	-0.113832	0.0492242
cg13524082	chr11	119294283	R	THY1	TSS200	shore	0.123553	0.0493463
cg10057237	chr6	36907397	R	NA	IGR	opensea	-0.108993	0.049458
cg17288256	chr12	129300720	R	MGC16384	TSS1500	opensea	-0.159298	0.0495205
cg13885053	chr13	100000008	R	UBAC2	Body	opensea	-0.107634	0.0496551
cg18422711	chr7	19392033	R	NA	IGR	opensea	0.10672	0.0496784
cg06543640	chr12	130698118	F	NA	IGR	opensea	0.205565	0.0498946
cg14486847	chr1	184899589	F	FAM129A	Body	opensea	-0.241214	0.0498946
cg22231400	chr19	49935823	R	SLC17A7	Body	island	-0.23437	0.0498946
cg17247669	chr9	110011679	R	NA	IGR	opensea	-0.146106	0.0498946
cg14214402	chr7	96637066	F	DLX6	Body	shore	-0.150603	0.0499642
cg26062858	chr10	15860248	R	FAM188A	Body	opensea	-0.10821	0.0499642
cg07391373	chr4	165728809	F	NA	IGR	opensea	-0.139368	0.0501369
cg01533059	chr4	75845113	R	NA	IGR	opensea	-0.134646	0.0501559
cg20791178	chr8	38246696	R	LETM2	5'UTR	shelf	-0.105612	0.0501559
cg21403762	chr13	111160550	R	COL4A2-AS1	TSS200	shelf	-0.143284	0.0502131
cg02111865	chr2	30371990	F	YPEL5	5'UTR	shore	-0.117567	0.0502131
cg19825988	chr3	141146295	R	ZBTB38	5'UTR	opensea	-0.100312	0.05038
cg21324884	chr3	64801329	R	MIR548A2	Body	opensea	0.146657	0.050403
cg22433862	chr1	28013341	R	NA	IGR	opensea	-0.172112	0.0504975
cg18968279	chr10	114718416	F	TCF7L2	Body	opensea	0.164442	0.0506247
cg27278001	chr14	101451739	F	SNORD114-25	TSS1500	opensea	-0.160791	0.0506247
cg18995275	chr15	89659639	F	ABHD2	Body	opensea	-0.144241	0.0506247
cg23378765	chr10	86090193	R	CCSER2	5'UTR	shore	-0.141179	0.0506247
cg12703852	chr8	98209210	R	LOC101927066	Body	opensea	-0.100051	0.0506247
cg18224468	chr2	102862128	R	NA	IGR	opensea	0.180801	0.0507182
cg12813792	chr20	56725695	R	C20orf85	TSS1500	shore	-0.186952	0.0508812
cg22574343	chr6	152489702	F	MIR3163	Body	opensea	-0.168901	0.0508812
cg14507897	chr12	1584074	F	ERC1	Body	opensea	0.168405	0.0509598
cg02933922	chr8	42360143	R	SLC20A2	TSS1500	opensea	-0.146519	0.0510383
cg16396907	chr11	114229775	F	NA	IGR	opensea	-0.176558	0.0510874
cg16259571	chr2	220384841	R	ACCN4	Body	shelf	-0.102507	0.0511085
cg20810997	chr20	29978353	F	DEFB119	5'UTR	opensea	0.102804	0.0511145
cg07151979	chr8	124046763	F	DERL1	Body	opensea	-0.135707	0.0511145
cg22315922	chr6	56622531	F	DST	Body	opensea	-0.234037	0.0511222
cg11248502	chr9	129871850	F	ANGPTL2	5'UTR	opensea	-0.146764	0.0511413
cg11912272	chr2	201204807	R	SPATS2L	5'UTR	opensea	-0.100489	0.0512508
cg07523148	chr4	81955126	F	BMP3	Body	shelf	-0.192416	0.0513783
cg24147428	chr11	65409760	R	SIPA1	Body	island	-0.153979	0.0513783
cg26384385	chr13	114186994	R	TMCO3	Body	shore	-0.1122	0.0514158
cg08808106	chr15	101693042	R	NA	IGR	opensea	-0.156179	0.0514578
cg10549916	chr4	95972631	R	BMPR1B	TSS200	opensea	-0.144859	0.0514729
cg00578624	chr3	189839197	F	P3H2	TSS1500	shore	-0.127146	0.0514729
cg08471925	chr7	47674869	R	NA	IGR	opensea	-0.172911	0.0515053
cg07648740	chr7	154864630	F	HTR5A	Body	shore	0.125227	0.0517684
cg20705893	chr7	157869970	F	PTPRN2	Body	opensea	0.159457	0.0517684
cg15034150	chr7	7276930	F	C1GALT1	Body	opensea	-0.13863	0.0517684
cg21216071	chr2	242303044	R	FARP2	5'UTR	opensea	-0.136949	0.0517684
cg15144153	chr2	74663598	R	RTKN	Body	island	-0.136297	0.0517684
cg27586693	chr9	4743729	R	NA	IGR	shore	-0.122793	0.0517684
cg23722790	chr1	67467602	R	SLC35D1	3'UTR	opensea	-0.112037	0.0517684
cg06500418	chr2	174025843	F	ZAK	Body	opensea	-0.194758	0.0518334
cg23083121	chr9	18297264	F	NA	IGR	opensea	0.155037	0.0518558
cg16560455	chr3	114166443	R	ZBTB20	Body	opensea	-0.217191	0.0518558
cg24602417	chr8	102236283	F	NA	IGR	island	-0.154896	0.0518558
cg03535447	chr10	30478412	F	NA	IGR	opensea	-0.126119	0.0519758
cg15886450	chr1	167874526	F	ADCY10	5'UTR	opensea	-0.201026	0.0521278
cg14397599	chr2	231663199	R	CAB39	Body	opensea	-0.136443	0.0521469
cg09487134	chr10	35195634	F	NA	IGR	opensea	-0.134738	0.0521469
cg23269320	chr7	81372100	F	HGF	Body	opensea	-0.105319	0.0521469
cg12338550	chr3	105801344	R	NA	IGR	opensea	-0.101532	0.0521966
cg20080548	chr19	36020200	R	SBSN	TSS1500	shelf	-0.15204	0.0521989
cg03595140	chr9	132772857	F	FNBP1	Body	opensea	-0.100738	0.0522124
cg05634047	chr2	239628943	R	NA	IGR	opensea	-0.187152	0.0522937
cg26310363	chr18	33011372	R	NA	IGR	opensea	-0.15837	0.052294
cg13018903	chr11	124806901	F	HEPACAM	TSS1500	opensea	-0.115442	0.0523447
cg25718696	chr4	151503588	R	LRBA	Body	shore	-0.112028	0.0523447
cg04338129	chr11	65635391	R	EFEMP2	Body	opensea	-0.121394	0.0523767
cg03727754	chr12	2564100	F	CACNA1C	Body	opensea	-0.119532	0.0525966
cg21317441	chr13	99984973	R	UBAC2	Body	opensea	-0.126533	0.0526041
cg20826610	chr1	26235868	R	NA	IGR	shelf	-0.106071	0.0526726
cg19334336	chr1	90158416	R	LRRC8C	Body	opensea	-0.144161	0.0528999
cg06155638	chr10	71931119	R	SAR1A	TSS1500	shore	-0.141775	0.0529446
cg04482825	chr15	37190548	R	MEIS2	Body	opensea	-0.104106	0.0530168
cg19907409	chr17	49175640	R	SPAG9	Body	opensea	-0.113409	0.0530216
cg22222659	chr2	55168463	F	EML6	Body	opensea	-0.111653	0.0530216
cg24995674	chr13	111127505	R	COL4A2	Body	opensea	-0.142882	0.0530572
cg18257193	chr12	106699438	F	TCP11L2	5'UTR	shelf	-0.114147	0.0532235
cg12570521	chr17	64708810	F	PRKCA	Body	opensea	-0.111644	0.0532235
cg12401644	chr8	2029881	F	MYOM2	Body	opensea	-0.189514	0.0533924
cg07275979	chr8	124084365	F	WDR67	TSS1500	shore	-0.17862	0.0533924
cg19106154	chr8	125503821	F	TATDN1	Body	opensea	-0.12014	0.0533924
cg00843917	chr1	33415247	F	RNF19B	Body	opensea	-0.159302	0.0536254
cg12165772	chr17	48070354	F	DLX3	Body	shore	-0.193013	0.0538899
cg01207684	chr16	4103167	R	ADCY9	Body	opensea	-0.277684	0.0539997
cg03400731	chr17	3747518	F	C17orf85	5'UTR	shore	-0.124751	0.0540243
cg13589463	chr14	100920326	F	WDR25	Body	opensea	-0.143867	0.0540369
cg13967339	chr8	17533669	F	MTUS1	Body	opensea	-0.255852	0.0540727
cg24947412	chr14	35699071	R	KIAA0391	Body	opensea	-0.12044	0.0540727
cg18795133	chr5	141130629	F	NA	IGR	shelf	0.14236	0.0540959
cg22063654	chr8	72758701	R	NA	IGR	shelf	-0.208275	0.0540959
cg04695208	chr10	98785628	F	SLIT1	Body	opensea	-0.163368	0.0540959
cg19375371	chr3	46021163	F	FYCO1	Body	opensea	-0.139204	0.0540959
cg15166296	chr12	81101022	F	MYF6	TSS1500	shore	-0.167895	0.054119
cg09832781	chr3	161572111	F	NA	IGR	opensea	-0.1562	0.054119
cg04247717	chr2	131797702	F	ARHGEF4	Body	island	-0.134777	0.054119
cg07732114	chr1	180886670	F	KIAA1614	Body	opensea	0.157571	0.0541666
cg00014991	chr6	56246720	R	RNU6-71P	Body	opensea	-0.145088	0.0541666
cg24842760	chr6	133561719	R	EYA4	TSS1500	shore	-0.219238	0.0541791
cg18310924	chr6	64359555	F	PHF3	Body	opensea	-0.163679	0.0541791
cg27289462	chr14	94405768	R	ASB2	Body	island	0.124614	0.0542591
cg17572907	chr2	36667351	R	CRIM1	Body	opensea	-0.166172	0.0542962
cg21076890	chr13	110965662	F	COL4A2	Body	shore	-0.123691	0.0542962
cg21464492	chr2	1691062	R	PXDN	Body	opensea	-0.121589	0.0542962
cg07774551	chr22	45724922	F	FAM118A	Body	opensea	-0.198623	0.0543311
cg24371954	chr13	111128102	F	COL4A2	Body	opensea	-0.126513	0.0543547
cg25563511	chr18	77714979	R	NA	IGR	shelf	-0.123704	0.0543547
cg27003815	chr2	97520891	R	ANKRD39	Body	shelf	-0.119609	0.0543547
cg24521688	chr12	2557073	R	CACNA1C	Body	opensea	-0.119257	0.0543656
cg16121816	chr8	134262101	R	NDRG1	Body	opensea	-0.197876	0.054464
cg09764443	chr11	120109778	F	POU2F3	TSS1500	shore	-0.105673	0.0545219
cg08114245	chr11	17408669	R	KCNJ11	1stExon	shore	-0.134263	0.0545604
cg00198080	chr12	107249142	R	RIC8B	Body	opensea	-0.104785	0.0545713
cg05328057	chr16	66436664	R	CDH5	Body	island	-0.133308	0.054621
cg09150191	chr11	66934933	F	KDM2A	Body	opensea	-0.122061	0.0547613
cg18150187	chr3	8879131	F	NA	IGR	opensea	0.134534	0.054803
cg20049007	chr11	34495005	R	NA	IGR	opensea	-0.132203	0.054803
cg17158414	chr2	27665306	F	KRTCAP3	1stExon	island	-0.12984	0.054803
cg22686043	chr1	70600560	F	NA	IGR	opensea	-0.116549	0.054803
cg11889652	chr20	33462556	R	ACSS2	TSS1500	shore	-0.107181	0.054803
cg02549859	chr9	139971393	F	UAP1L1	TSS1500	shore	-0.106217	0.054803
cg04807685	chr2	37894464	R	CDC42EP3	5'UTR	shelf	-0.105851	0.054803
cg19817825	chr14	35844085	R	NA	IGR	opensea	-0.105172	0.054803
cg23696432	chr19	45150725	R	PVR	Body	island	-0.132816	0.0548259
cg27580252	chr9	91415423	F	NA	IGR	opensea	-0.117148	0.054866
cg17930381	chr15	74604961	R	CCDC33	Body	opensea	-0.133588	0.0549032
cg09135347	chr5	10139180	R	NA	IGR	opensea	-0.16976	0.0549509
cg12137686	chr10	54061116	F	PRKG1-AS1	Body	opensea	-0.132934	0.0549509
cg10310469	chr6	43117933	R	PTK7	Body	opensea	-0.121676	0.0549509
cg03209043	chr2	145217529	R	ZEB2	Body	opensea	-0.198743	0.0550644
cg07516556	chr5	1475096	F	LPCAT1	Body	opensea	-0.123949	0.0550644
cg23209962	chr5	73163484	R	RGNEF	Body	opensea	-0.160971	0.0552466
cg00528616	chr16	75036318	F	ZNRF1	Body	shelf	-0.161567	0.0553172
cg20400248	chr8	9005257	F	PPP1R3B	5'UTR	shelf	-0.15887	0.0553172
cg14087536	chr22	23626455	R	BCR	Body	opensea	-0.134315	0.0553172
cg25968326	chr10	97051613	F	PDLIM1	TSS1500	shore	-0.123456	0.0553172
cg07342351	chr9	100662756	F	NA	IGR	opensea	0.188283	0.0553291
cg11752894	chr1	205196012	F	TMCC2	TSS1500	shore	-0.110863	0.0554358
cg18686270	chr3	146258875	F	PLSCR1	5'UTR	shelf	-0.170565	0.0555003
cg27207776	chr16	71393801	R	CALB2	Body	shore	0.119837	0.0555595
cg04806741	chr12	113642799	R	IQCD	Body	opensea	-0.174108	0.0555595
cg00478479	chr19	40904851	F	PRX	Body	island	-0.171441	0.0555595
cg20386759	chr4	54519524	F	NA	IGR	opensea	-0.140276	0.0555595
cg09926389	chr19	41837123	R	TGFB1	Body	island	-0.132323	0.0555595
cg13023584	chr5	140821425	R	PCDHGA4	Body	island	-0.120685	0.0555595
cg10092607	chr4	25097821	R	NA	IGR	island	-0.105516	0.0555603
cg22532314	chr8	41546072	R	ANK1	Body	opensea	-0.112271	0.0556057
cg17341110	chr1	9124396	F	SLC2A5	Body	opensea	0.118361	0.0558366
cg15947228	chr12	120121494	F	NA	IGR	opensea	0.261931	0.0559666
cg17574930	chr3	71257783	F	FOXP1	5'UTR	opensea	-0.231865	0.0559666
cg08823240	chr17	43388897	R	MAP3K14	5'UTR	opensea	-0.150507	0.0559666
cg06330055	chr11	129564162	R	NA	IGR	opensea	-0.131259	0.0560721
cg03292688	chr4	124017413	F	SPATA5	Body	opensea	-0.112474	0.0560721
cg15800404	chr21	37757105	R	CHAF1B	TSS1500	shore	-0.190432	0.0561284
cg25123814	chr11	46494341	R	AMBRA1	Body	opensea	-0.122863	0.0561284
cg16177585	chr2	86254535	R	POLR1A	3'UTR	opensea	-0.100243	0.0561284
cg18230995	chr11	12109751	F	NA	IGR	opensea	0.13342	0.0562222
cg10248488	chr6	144652135	F	UTRN	Body	opensea	-0.120602	0.0562222
cg08086873	chr8	25864868	F	EBF2	Body	opensea	0.184111	0.0563373
cg08728495	chr12	125102346	R	NA	IGR	opensea	-0.147671	0.0563373
cg21063056	chr22	34605806	R	NA	IGR	opensea	0.116622	0.0564902
cg18334681	chr6	132066129	F	ENPP3	Body	opensea	-0.198363	0.0564902
cg22636697	chr20	44839859	R	CDH22	Body	shore	-0.190759	0.0564902
cg07375732	chr12	29312659	R	FAR2	5'UTR	opensea	-0.17632	0.0564902
cg18722504	chr5	139712966	R	HBEGF	3'UTR	opensea	-0.131276	0.0564902
cg04811413	chr5	60573761	F	NA	IGR	opensea	-0.130611	0.0564902
cg02224314	chr14	99641151	R	BCL11B	Body	island	-0.12267	0.0564902
cg11562836	chr10	134222581	F	PWWP2B	3'UTR	shelf	-0.114874	0.0564902
cg05425144	chr5	90653147	F	NA	IGR	opensea	-0.156252	0.0566634
cg08175413	chr5	96294187	R	LNPEP	Body	opensea	-0.125437	0.0567553
cg05098432	chr10	95848734	R	PLCE1	TSS200	opensea	0.111316	0.056833
cg16611278	chr12	113514933	F	DTX1	Body	shore	-0.1404	0.0568766
cg20543950	chr15	80929325	F	NA	IGR	opensea	-0.183934	0.0570493
cg03732627	chr15	61208437	R	RORA	Body	opensea	-0.166576	0.0570493
cg19143336	chr3	32148863	F	GPD1L	Body	island	-0.161899	0.0570493
cg26872588	chr1	230992820	F	C1orf198	Body	opensea	-0.114565	0.0570493
cg11653176	chr17	48420466	F	NA	IGR	shelf	-0.11182	0.0570493
cg27375542	chr2	106778611	F	UXS1	Body	opensea	-0.10443	0.0570493
cg18007541	chr14	72155536	R	SIPA1L1	Body	opensea	-0.103534	0.0570493
cg10333908	chr1	222695659	F	HHIPL2	3'UTR	opensea	-0.158946	0.0572165
cg06957219	chr1	231942155	R	DISC1	Body	opensea	-0.156552	0.0573882
cg24154948	chr12	66061959	F	NA	IGR	opensea	-0.119867	0.0574632
cg14834568	chr10	14614421	F	FAM107B	5'UTR	opensea	-0.149814	0.057546
cg07580128	chr8	142157140	F	DENND3	Body	opensea	-0.161055	0.0575496
cg14957841	chr2	178035371	F	NA	IGR	opensea	-0.123581	0.0576272
cg22496723	chr22	36960779	F	CACNG2	Body	island	-0.14693	0.0576723
cg22286425	chr8	134262129	F	NDRG1	Body	opensea	-0.199717	0.0579805
cg07917901	chr14	35870184	R	NA	IGR	shelf	-0.183211	0.0579805
cg10256797	chr12	28284682	F	NA	IGR	opensea	-0.172408	0.0579805
cg22845755	chr19	42621692	R	POU2F2	Body	opensea	-0.130452	0.0579805
cg13375636	chr10	134190059	R	LRRC27	3'UTR	opensea	-0.124848	0.0579805
cg16540829	chr12	129304569	F	SLC15A4	Body	shelf	-0.112066	0.0579805
cg20668096	chr4	151500192	F	LRBA	Body	shore	-0.198858	0.0581117
cg00567448	chr3	121271467	F	NA	IGR	opensea	-0.185212	0.0581117
cg12255309	chr16	70782427	F	VAC14	Body	opensea	-0.18035	0.0581117
cg00534380	chr2	101766586	R	TBC1D8	Body	shore	-0.166559	0.0581117
cg08885224	chr6	133561368	F	EYA4	TSS1500	shore	-0.15025	0.0581117
cg00792053	chr4	25097886	R	NA	IGR	island	-0.136124	0.0581117
cg20984967	chr12	122390534	R	WDR66	Body	opensea	-0.11883	0.0581117
cg11868921	chr6	154812487	F	CNKSR3	Body	opensea	-0.116486	0.0581766
cg03286098	chr8	42271413	F	NA	IGR	shelf	-0.110365	0.0582056
cg00955840	chr5	122016561	F	LOC101927379	Body	opensea	-0.147022	0.0585856
cg20704654	chr20	30072118	F	NCRNA00028	TSS1500	island	-0.10172	0.0586079
cg21211213	chr5	158127763	R	EBF1	Body	opensea	0.10891	0.0587182
cg19309616	chr1	41851836	R	NA	IGR	shelf	0.146473	0.0587182
cg08014027	chr16	27543174	R	GTF3C1	Body	opensea	-0.183358	0.0587182
cg00045164	chr7	16845033	R	AGR2	TSS1500	opensea	-0.145159	0.0587182
cg24189328	chr17	61553118	F	ACE	TSS1500	shore	-0.145111	0.0587182
cg13836323	chr19	3135189	R	GNA15	TSS1500	opensea	-0.10709	0.0587182
cg05663262	chr1	43930279	R	NA	IGR	opensea	-0.10457	0.0587182
cg11314617	chr8	72757456	R	MSC	TSS1500	shore	-0.261482	0.0587672
cg02395235	chr5	147618067	F	NA	IGR	opensea	0.127336	0.0588063
cg13448633	chr5	95260620	F	ELL2	Body	opensea	-0.250719	0.0588063
cg02567323	chr2	48671699	R	KLRAQ1	Body	shelf	-0.144265	0.0588063
cg25917417	chr2	204937316	F	NA	IGR	opensea	-0.13573	0.0588063
cg11037025	chr4	56760216	R	EXOC1	Body	opensea	-0.190463	0.0589786
cg17001765	chr1	249212500	F	PGBD2	Body	opensea	-0.129731	0.0590095
cg23845889	chr8	17270608	R	MTMR7	Body	island	-0.143164	0.0590412
cg25308901	chr3	100729399	R	NA	IGR	opensea	0.187063	0.05909
cg14830513	chr20	51962805	R	TSHZ2	3'UTR	opensea	-0.200953	0.05909
cg05769747	chr20	36712239	R	RPRD1B	Body	opensea	-0.183025	0.05909
cg15734461	chr5	132126059	R	NA	IGR	opensea	-0.170021	0.05909
cg12020251	chr3	159559191	F	SCHIP1	Body	opensea	-0.162025	0.05909
cg05723902	chr14	104577028	R	ASPG	Body	opensea	-0.153304	0.05909
cg02819727	chr11	101744168	F	NA	IGR	opensea	-0.149266	0.05909
cg21145686	chr3	32149153	F	GPD1L	Body	shore	-0.11882	0.05909
cg19010223	chr14	20798111	F	CCNB1IP1	TSS1500	opensea	-0.117281	0.05909
cg12196814	chr2	11480980	R	ROCK2	Body	shelf	-0.185982	0.0592673
cg11216595	chr5	154208971	R	MIR378H	TSS200	opensea	-0.150368	0.0593089
cg24906732	chr16	3031577	F	PKMYT1	TSS1500	shore	-0.135737	0.0593089
cg09706192	chr11	88068895	F	CTSC	Body	shore	-0.134647	0.0593089
cg12547340	chr9	139877234	F	LCNL1	TSS1500	shelf	-0.102395	0.0593089
cg25237396	chr19	802198	R	PTBP1	Body	shelf	-0.209273	0.0593554
cg17013360	chr2	202921665	F	NA	IGR	opensea	-0.207779	0.0593554
cg00690343	chr1	94020824	F	NA	IGR	opensea	-0.158448	0.0593852
cg22649529	chr19	14665127	R	TECR	Body	opensea	-0.105641	0.0593852
cg05728600	chr22	46869829	R	CELSR1	Body	opensea	-0.105181	0.0593852
cg13936383	chr9	139528170	R	NA	IGR	shore	-0.137918	0.0594273
cg04387796	chr22	40989844	R	MKL1	5'UTR	opensea	-0.111095	0.0594273
cg18797449	chr7	39696203	R	RALA	5'UTR	opensea	-0.148794	0.0594865
cg12958092	chr11	95724591	R	MAML2	Body	opensea	-0.177516	0.0596673
cg14671764	chr2	1690592	F	PXDN	Body	opensea	-0.163269	0.0596673
cg18705622	chr3	167446693	R	PDCD10	5'UTR	opensea	-0.157317	0.0596673
cg02599361	chr5	178548373	F	ADAMTS2	Body	island	-0.156656	0.0596673
cg01324291	chr5	70307538	R	NAIP	Body	opensea	-0.143266	0.0596673
cg26315457	chr2	48759821	R	NA	IGR	shelf	-0.138028	0.0596673
cg17716039	chr20	48442381	F	SLC9A8	Body	opensea	-0.128723	0.0596673
cg21062364	chr11	134010438	F	JAM3	Body	opensea	-0.113804	0.0596673
cg21474133	chr2	30334318	F	NA	IGR	opensea	-0.110931	0.0596673
cg00142940	chr10	90646294	F	STAMBPL1	5'UTR	opensea	-0.110419	0.0596673
cg26289379	chr16	2379798	F	ABCA3	5'UTR	opensea	-0.104872	0.0596673
cg24624505	chr17	69972248	R	NA	IGR	opensea	0.172101	0.0597591
cg12829045	chr10	77228852	F	NA	IGR	opensea	0.126391	0.0597626
cg07650439	chr12	26038852	F	NA	IGR	opensea	-0.127597	0.059781
cg18165065	chr1	8130665	R	NA	IGR	opensea	-0.141063	0.0598265
cg17121140	chr13	111719003	R	NA	IGR	shore	-0.11756	0.0598265
cg20334738	chr4	151502939	R	MAB21L2	TSS200	shore	-0.100268	0.0598265
cg08212070	chr21	46287452	R	PTTG1IP	Body	opensea	-0.153464	0.05983
cg24151023	chr1	234709674	R	NA	IGR	opensea	-0.113543	0.05983
cg11896799	chr3	124771321	R	HEG1	Body	shelf	0.110538	0.059934
cg06730002	chr3	45906856	F	LZTFL1	5'UTR	opensea	0.170513	0.059934
cg12082015	chr2	147789639	F	NA	IGR	opensea	-0.205956	0.059934
cg05517976	chr7	27220049	F	HOXA10	TSS200	shore	-0.203791	0.059934
cg19478682	chr2	177015812	R	HOXD4	TSS1500	shore	-0.202881	0.059934
cg00083072	chr11	65415190	F	SIPA1	Body	island	-0.18714	0.059934
cg04253235	chr20	1292311	F	SDCBP2	Body	shore	-0.186763	0.059934
cg26485878	chr5	58652602	F	PDE4D	1stExon	opensea	-0.168873	0.059934
cg11642880	chr2	242020988	F	SNED1	Body	opensea	-0.155611	0.059934
cg17454746	chr20	62716485	R	OPRL1	5'UTR	island	-0.137898	0.059934
cg07925606	chr3	146343333	F	NA	IGR	opensea	-0.135034	0.059934
cg12486635	chr12	57828461	F	INHBC	TSS200	opensea	-0.127778	0.059934
cg17163381	chr11	72064988	F	CLPB	Body	opensea	-0.120049	0.059934
cg00352027	chr10	71893159	F	AIFM2	TSS1500	shore	-0.112076	0.059934
cg05191222	chr10	4448386	R	LINC00703	TSS1500	opensea	-0.108261	0.059934
cg04848343	chr19	4544095	R	SEMA6B	Body	island	-0.106602	0.059934
cg19229441	chr10	6008529	R	IL15RA	Body	opensea	-0.100092	0.059934
cg07525782	chr5	33324641	R	NA	IGR	opensea	-0.14137	0.0600012
cg04053108	chr12	6166028	R	VWF	Body	island	-0.134179	0.0600012
cg20703530	chr1	8273977	F	LOC102724539	Body	shore	-0.125864	0.0600044
cg01895008	chr2	170370674	R	KLHL41	Body	opensea	-0.165288	0.0600554
cg03205160	chr17	64421543	F	PRKCA	Body	opensea	-0.123997	0.0600554
cg12950817	chr12	2206903	R	CACNA1C	Body	opensea	-0.113815	0.0600554
cg24142603	chr8	72753888	F	MSC	3'UTR	island	-0.181123	0.060096
cg07835689	chr15	35467609	R	NA	IGR	opensea	-0.164009	0.060096
cg17183770	chr3	170079338	R	SKIL	Body	shelf	-0.138644	0.060096
cg24863255	chr3	171561069	F	TMEM212	TSS200	opensea	-0.129493	0.060096
cg14475554	chr1	209799191	R	LAMB3	Body	island	-0.123534	0.060096
cg09680131	chr13	111100754	R	COL4A2	Body	opensea	-0.176068	0.0601363
cg13283046	chr1	236096014	F	NA	IGR	opensea	-0.132926	0.0602428
cg09739217	chr5	124828339	F	LOC101927460	TSS1500	opensea	-0.121194	0.0603765
cg19403610	chr10	128359014	F	NA	IGR	opensea	-0.11653	0.0604864
cg23390118	chr12	2339513	R	CACNA1C	Body	island	-0.1608	0.0605534
cg18315468	chr2	234330835	R	DGKD	Body	opensea	-0.11171	0.0606117
cg14166756	chr15	90894880	R	ZNF774	TSS1500	shore	-0.141	0.0606433
cg16716242	chr7	43529868	R	HECW1	Body	opensea	-0.11801	0.0606862
cg11247817	chr5	96294344	R	LNPEP	Body	opensea	-0.189772	0.0607776
cg10408636	chr2	96869389	F	STARD7	Body	opensea	-0.179441	0.0607776
cg26005361	chr19	42599851	R	POU2F2	Body	island	-0.11897	0.0607776
cg22430664	chr10	95276726	F	CEP55	Body	opensea	-0.142197	0.0607959
cg11619090	chr2	232536151	F	NA	IGR	opensea	-0.117557	0.0608034
cg12995976	chr3	128265869	F	NA	IGR	opensea	-0.114606	0.0608807
cg08885409	chr17	55969571	F	CUEDC1	5'UTR	opensea	-0.164035	0.0609176
cg03980268	chr15	26147082	F	NA	IGR	opensea	-0.155022	0.0609889
cg20003983	chr20	56725730	F	C20orf85	TSS1500	shore	-0.121873	0.0612504
cg00544125	chr5	134762598	F	NA	IGR	opensea	-0.133108	0.0613322
cg19960139	chr9	137415158	F	NA	IGR	opensea	-0.132079	0.0613322
cg19154467	chr3	177700638	F	NA	IGR	opensea	-0.128954	0.0613322
cg05992372	chr8	42401416	F	SMIM19	5'UTR	opensea	-0.100398	0.0613322
cg21552242	chr3	157814326	R	SHOX2	3'UTR	shore	-0.209312	0.0613636
cg20754348	chr15	96869220	F	NR2F2	5'UTR	shelf	0.137909	0.0613704
cg16540704	chr7	117067416	R	ASZ1	Body	island	-0.140593	0.061372
cg22619104	chr20	1851854	R	NA	IGR	opensea	-0.165076	0.0614484
cg14543182	chr10	126615372	F	NA	IGR	opensea	-0.110629	0.0615287
cg13395373	chr1	235664791	R	B3GALNT2	Body	shelf	-0.109082	0.0615287
cg09363375	chr6	1247581	R	NA	IGR	opensea	0.211106	0.0616485
cg21569045	chr12	50357055	F	AQP5	Body	shore	-0.154343	0.0616485
cg24049157	chr2	42794360	R	MTA3	TSS1500	shore	-0.192966	0.0616796
cg03226187	chr2	13107355	R	LOC100506474	Body	opensea	-0.158231	0.061928
cg02465887	chr4	155336816	R	DCHS2	Body	shore	-0.140189	0.061928
cg05248950	chr19	6462288	R	NA	IGR	shore	0.164256	0.0619352
cg18860041	chr12	50903093	F	DIP2B	Body	shelf	-0.122333	0.0619352
cg16130066	chr2	158118099	F	GALNT5	Body	opensea	-0.21357	0.0620259
cg19613592	chr15	59639303	R	MYO1E	Body	opensea	-0.114893	0.0620881
cg23409374	chr19	49934742	F	SLC17A7	Body	island	-0.110606	0.0620881
cg23082424	chr1	8944998	R	NA	IGR	opensea	-0.146528	0.062169
cg10354542	chr10	119795016	F	RAB11FIP2	Body	opensea	-0.141196	0.0622099
cg11927838	chr7	28244108	R	JAZF1-AS1	Body	opensea	-0.11439	0.0622544
cg21373811	chr14	103498437	F	CDC42BPB	Body	opensea	-0.106023	0.0622544
cg24990015	chr3	29333269	R	RBMS3	Body	opensea	-0.106406	0.0622556
cg03053826	chr15	96868935	F	NR2F2	TSS1500	shelf	0.128465	0.0622583
cg13831540	chr7	130128420	F	MESTIT1	Body	shore	-0.155617	0.0622583
cg19488155	chr9	113431167	F	MUSK	5'UTR	opensea	-0.149092	0.0622583
cg17192520	chr14	88461468	R	GALC	TSS1500	shore	-0.139567	0.0622583
cg27518170	chr12	65049106	F	RASSF3	Body	opensea	-0.125423	0.0622583
cg05776902	chr10	93349680	F	HECTD2-AS1	Body	opensea	-0.123221	0.0622583
cg02358790	chr12	106681933	F	NA	IGR	opensea	-0.105167	0.0622583
cg17938178	chr11	10673797	F	MRVI1	1stExon	opensea	-0.170944	0.0622586
cg23480273	chr3	23559944	F	UBE2E2	Body	opensea	-0.159354	0.0623053
cg06814469	chr1	90409202	R	NA	IGR	opensea	-0.165668	0.0624182
cg09946915	chr8	46941151	R	NA	IGR	opensea	0.10222	0.062453
cg10477588	chr10	52082040	R	SGMS1	Body	opensea	0.143169	0.062453
cg14365043	chr3	131222488	R	MRPL3	TSS1500	shore	0.165171	0.062453
cg19017034	chr7	50719125	R	GRB10	Body	opensea	-0.113041	0.062453
cg11398731	chr4	146547003	R	MMAA	5'UTR	opensea	-0.109337	0.062453
cg06575656	chr7	150809483	R	AGAP3	5'UTR	opensea	-0.145565	0.0624531
cg05546038	chr16	67207033	F	NOL3	TSS1500	shore	-0.139928	0.0624531
cg19673155	chr10	72995181	R	UNC5B	Body	opensea	0.102906	0.0624878
cg00685585	chr1	29503379	R	SRSF4	Body	opensea	0.153166	0.0624878
cg08188076	chr2	36826004	F	FEZ2	TSS1500	shore	-0.13647	0.0624878
cg16842214	chr3	42727160	F	KBTBD5	1stExon	island	-0.119616	0.0624878
cg00330059	chr4	183637135	R	ODZ3	Body	opensea	-0.105768	0.0624878
cg18177414	chr7	149389929	F	NA	IGR	island	0.123861	0.0625119
cg10321973	chr14	105659807	R	NA	IGR	shore	0.147089	0.0625119
cg26421104	chr5	17100281	F	NA	IGR	opensea	-0.16258	0.0625119
cg13753515	chr20	3687817	R	SIGLEC1	TSS200	opensea	-0.141643	0.0625119
cg17080927	chr9	136619498	F	NA	IGR	opensea	-0.12563	0.0625659
cg23369564	chr1	150123734	F	PLEKHO1	Body	shore	0.114834	0.0625707
cg20721644	chr5	964396	R	NA	IGR	opensea	0.121053	0.0625707
cg09990852	chr4	71587726	F	RUFY3	1stExon	opensea	0.211692	0.0625707
cg14063916	chr6	43351415	R	NA	IGR	opensea	-0.198673	0.0625707
cg10244461	chr3	189839357	R	LEPREL1	5'UTR	shore	-0.169367	0.0625707
cg15827559	chr3	99816799	F	FILIP1L	5'UTR	opensea	-0.158452	0.0625707
cg22792941	chr17	39143416	F	KRT40	TSS200	opensea	-0.158345	0.0625707
cg07229946	chr15	89658522	F	ABHD2	5'UTR	opensea	-0.125618	0.0625707
cg26695758	chr6	32063607	F	TNXB	Body	island	-0.185926	0.0627796
cg01219490	chr17	56788051	F	RAD51C	Body	opensea	-0.168855	0.0627796
cg14073535	chr12	50942855	F	DIP2B	Body	opensea	-0.147643	0.062801
cg11797430	chr12	2761364	F	CACNA1C	Body	opensea	-0.143528	0.062801
cg06521527	chr6	11217462	R	NEDD9	Body	opensea	-0.162018	0.0628182
cg06917450	chr1	38156652	F	C1orf109	TSS1500	shore	0.138972	0.0629088
cg06273106	chr15	101469065	R	LRRK1	Body	opensea	-0.142731	0.0629395
cg03852311	chr20	30168797	R	NA	IGR	opensea	-0.100203	0.0629409
cg03020485	chr7	1748081	R	ELFN1	TSS1500	opensea	-0.101198	0.0630446
cg10233454	chr12	57529389	F	LRP1	Body	opensea	0.151515	0.0630542
cg12814984	chr13	50253445	R	EBPL	Body	opensea	-0.14964	0.0630542
cg12307237	chr5	178735241	F	ADAMTS2	Body	opensea	-0.16056	0.0630694
cg01863964	chr14	25512111	R	STXBP6	5'UTR	opensea	-0.190384	0.0631691
cg18431183	chr11	64418871	R	NRXN2	Body	opensea	-0.122608	0.0631691
cg12242579	chr13	24025497	F	NA	IGR	opensea	-0.120755	0.0631691
cg07004075	chr14	24649335	R	REC8	3'UTR	opensea	0.175847	0.0632636
cg00305996	chr2	227655319	R	IRS1	3'UTR	shore	-0.167668	0.0632636
cg13580172	chr21	42613492	R	BACE2	Body	opensea	-0.106662	0.0632636
cg19547694	chr22	50174005	F	BRD1	Body	shelf	-0.141165	0.063327
cg22626168	chr15	101513246	R	LRRK1	Body	island	-0.159428	0.0634267
cg21313672	chr6	83761803	R	UBE3D	Body	opensea	-0.126703	0.0634267
cg13392422	chr6	17032554	R	NA	IGR	opensea	-0.100938	0.0634267
cg14872260	chr4	55095209	F	PDGFRA	TSS200	shore	0.158449	0.0634306
cg17637715	chr2	1650076	R	PXDN	Body	shore	-0.204754	0.0634306
cg09578344	chr3	193995523	F	NA	IGR	opensea	0.114912	0.0635561
cg08133718	chr20	35454174	F	SOGA1	Body	opensea	-0.152843	0.0635971
cg12982374	chr5	176523370	R	FGFR4	Body	shelf	-0.141311	0.0635971
cg10812392	chr5	7857648	R	NA	IGR	opensea	-0.10724	0.0636745
cg26200795	chr18	52895482	R	TCF4	Body	opensea	-0.175618	0.0637357
cg24613558	chr17	65471347	R	PITPNC1	Body	opensea	-0.223204	0.0637613
cg00518527	chr19	11268884	R	NA	IGR	shelf	-0.177563	0.0637613
cg03761958	chr10	11856193	F	NA	IGR	opensea	-0.128321	0.063771
cg20292908	chr5	172203421	R	NA	IGR	shelf	-0.117928	0.0638991
cg16287507	chr10	2208470	F	NA	IGR	opensea	0.120873	0.0639948
cg23089880	chr19	55083507	F	LILRA2	TSS1500	opensea	0.125349	0.0639948
cg24002149	chr1	172113920	R	DNM3	Body	opensea	0.199524	0.0640127
cg10787768	chr5	145897220	R	NA	IGR	opensea	-0.144403	0.0640127
cg20593774	chr8	27181948	R	PTK2B	TSS1500	shore	-0.142138	0.0640127
cg08809435	chr10	64029551	R	RTKN2	TSS1500	shore	-0.105618	0.0640127
cg21897315	chr3	81811448	R	GBE1	TSS1500	shore	-0.141305	0.0640256
cg06425631	chr8	42394458	R	SLC20A2	5'UTR	shore	-0.139107	0.0640267
cg15786028	chr6	28534159	F	NA	IGR	opensea	-0.128657	0.0640267
cg00182168	chr2	223804425	R	ACSL3	Body	opensea	-0.101299	0.0640267
cg12965535	chr6	152476668	R	MIR3163	Body	opensea	-0.118843	0.0640982
cg03894461	chr2	10116731	F	GRHL1	Body	opensea	-0.104022	0.0641021
cg07274333	chr12	20193597	R	NA	IGR	opensea	-0.174234	0.0641266
cg11128254	chr17	428311	R	VPS53	Body	opensea	-0.129895	0.0641266
cg19800061	chr3	65940361	R	MAGI1	Body	opensea	-0.127744	0.0641266
cg04770182	chr11	126890699	R	NA	IGR	opensea	-0.127444	0.0641266
cg22033857	chr8	58947178	F	FAM110B	5'UTR	opensea	-0.126513	0.0641266
cg18849603	chr18	52970567	R	TCF4	TSS1500	opensea	-0.124459	0.0641266
cg14075356	chr2	208615221	R	CCNYL1	Body	opensea	-0.12145	0.0641266
cg02527751	chr16	2743684	R	KCTD5	Body	shelf	-0.120115	0.0641266
cg13790314	chr17	42744572	R	C17orf104	Body	opensea	-0.115187	0.0641266
cg24903668	chr5	142941044	R	NA	IGR	opensea	-0.109204	0.0641266
cg00667201	chr15	58808362	R	LIPC	Body	opensea	-0.105125	0.0641266
cg04716958	chr16	20807429	R	ACSM3	Body	opensea	-0.101769	0.0641266
cg21726132	chr7	27936643	R	JAZF1	Body	opensea	-0.105799	0.0643206
cg14703482	chr4	123758759	F	FGF2	Body	opensea	-0.14979	0.0643634
cg16215520	chr15	78065200	R	LINGO1	5'UTR	opensea	-0.119917	0.0643634
cg27303018	chr5	176058728	R	SNCB	TSS1500	shore	-0.118748	0.0643634
cg17775944	chr14	96152671	F	TCL1B	TSS200	opensea	0.117215	0.0645151
cg19412295	chr7	90224594	R	NA	IGR	shore	0.148761	0.0645151
cg13769792	chr15	100258219	R	NA	IGR	opensea	-0.173889	0.0645151
cg14157461	chr18	3283177	R	NA	IGR	opensea	-0.167099	0.0645151
cg10044815	chr11	102195643	R	BIRC3	Body	opensea	-0.156469	0.0645151
cg20469680	chr7	135458419	F	NA	IGR	opensea	-0.130369	0.0645151
cg17238830	chr5	76256017	F	CRHBP	Body	opensea	-0.123103	0.0645591
cg12017968	chr9	97848773	R	MIR3074	TSS1500	shore	-0.149477	0.064575
cg15546194	chr3	137800724	F	DZIP1L	Body	opensea	0.146316	0.0645866
cg27508180	chr7	94039079	F	COL1A2	Body	opensea	0.137669	0.064617
cg21497060	chr2	152590396	F	NEB	5'UTR	opensea	-0.158704	0.0646307
cg23579490	chr11	88078288	R	NA	IGR	opensea	-0.202503	0.0646632
cg26808687	chr1	201979499	F	ELF3	TSS200	opensea	-0.164838	0.0646632
cg03038413	chr3	46967742	F	CCDC12	Body	opensea	-0.111798	0.0646724
cg15713912	chr2	219667302	R	CYP27A1	Body	opensea	-0.18559	0.064797
cg10426234	chr12	132939776	R	NA	IGR	shore	-0.166032	0.0648125
cg06118782	chr19	42676062	R	NA	IGR	opensea	-0.159548	0.0649285
cg03453449	chr12	95945120	R	USP44	1stExon	shelf	-0.126948	0.0649285
cg17345283	chr12	132280296	F	SFSWAP	Body	shelf	-0.108441	0.0651657
cg23656872	chr1	167633584	F	RCSD1	Body	opensea	-0.208693	0.0651987
cg00077904	chr5	151078909	R	NA	IGR	opensea	0.10796	0.0652359
cg06289182	chr10	133485190	R	NA	IGR	opensea	0.124389	0.0652359
cg11056870	chr3	87007970	R	VGLL3	Body	opensea	0.15017	0.0652359
cg09929187	chr12	92501570	R	NA	IGR	opensea	-0.185041	0.0652359
cg21693437	chr11	31851924	R	NA	IGR	shelf	-0.158286	0.0652804
cg03290827	chr17	75180760	F	SEC14L1	Body	opensea	-0.117233	0.0653112
cg05289698	chr15	59908160	F	GCNT3	5'UTR	opensea	0.180527	0.0653272
cg05120309	chr14	100485494	F	NA	IGR	opensea	-0.119171	0.0653875
cg11662450	chr2	68696410	F	APLF	Body	shore	-0.108222	0.0653875
cg12045875	chr6	74104594	R	DDX43	1stExon	island	-0.199387	0.0655054
cg03278715	chr14	25512123	R	STXBP6	5'UTR	opensea	-0.195895	0.0655054
cg04418832	chr11	2411499	F	CD81	5'UTR	opensea	-0.180492	0.065641
cg20971003	chr12	111004303	R	PPTC7	Body	opensea	-0.180404	0.065641
cg23484778	chr10	126363580	R	FAM53B	Body	opensea	-0.140376	0.065641
cg27294008	chr3	52748359	R	NEK4	Body	opensea	-0.126531	0.065641
cg17431079	chr1	39607710	R	MACF1	Body	opensea	-0.18459	0.0656673
cg23742556	chr19	39170807	R	ACTN4	Body	opensea	-0.153807	0.0657434
cg03540344	chr11	44606379	R	CD82	5'UTR	opensea	-0.138474	0.0657434
cg06962276	chr8	118962794	F	EXT1	Body	opensea	-0.128639	0.0657434
cg21793553	chr1	32263216	R	SPOCD1	Body	opensea	-0.126857	0.0657434
cg08255598	chr2	74735875	F	PCGF1	TSS1500	shore	-0.126531	0.0657434
cg14446951	chr2	36605829	F	CRIM1	Body	opensea	-0.119781	0.0657434
cg10030598	chr4	88928147	R	PKD2	TSS1500	shore	-0.11546	0.0657434
cg04852323	chr16	69975865	F	NA	IGR	opensea	-0.112936	0.0657434
cg25504868	chr11	567480	R	NA	IGR	shore	-0.103623	0.0657434
cg11059170	chr1	161147953	R	B4GALT3	TSS200	shore	-0.101723	0.0657434
cg04022300	chr6	116714147	R	DSE	5'UTR	opensea	-0.109365	0.0658577
cg11174251	chr4	153891679	F	FHDC1	Body	opensea	0.112867	0.065929
cg12666849	chr18	33190359	R	NA	IGR	opensea	-0.195635	0.065929
cg07081759	chr10	126330905	F	FAM53B	Body	opensea	-0.153363	0.065929
cg18134437	chr7	158054555	R	PTPRN2	Body	opensea	0.153465	0.0659434
cg20810117	chr8	22255186	R	SLC39A14	5'UTR	opensea	0.20524	0.0659434
cg05026674	chr20	39704724	F	TOP1	Body	opensea	-0.213117	0.0659434
cg10432422	chr1	17475819	R	NA	IGR	island	-0.236701	0.0659435
cg15873474	chr20	60445998	R	CDH4	Body	shelf	-0.181545	0.0659544
cg22993554	chr8	18698050	R	PSD3	Body	opensea	-0.20304	0.0659832
cg19274761	chr19	55222526	F	LILRP2	Body	opensea	0.119083	0.0660153
cg07673127	chr12	29866066	F	TMTC1	Body	opensea	0.128429	0.0660153
cg22813585	chr22	40706285	R	TNRC6B	Body	opensea	0.194342	0.0660153
cg09165919	chr19	6234625	F	MLLT1	Body	shelf	-0.152006	0.0660153
cg26748715	chr3	195587468	R	NA	IGR	opensea	-0.148695	0.0660153
cg11272874	chr11	44264948	F	EXT2	Body	opensea	-0.146577	0.0660153
cg12058922	chr1	47674695	R	NA	IGR	opensea	-0.12865	0.0661032
cg21695727	chr15	85347344	R	ZNF592	3'UTR	opensea	-0.137554	0.0662483
cg22456251	chr15	89155073	R	MIR7-2	Body	opensea	-0.134218	0.0662483
cg05023809	chr13	30462667	F	LINC00297	TSS200	opensea	-0.128165	0.0663408
cg01758864	chr1	207238336	F	PFKFB2	Body	opensea	-0.121141	0.0663816
cg21864195	chr6	73862600	F	KCNQ5	Body	opensea	-0.110605	0.0663816
cg14878685	chr11	88241425	R	GRM5	3'UTR	shore	-0.156655	0.0664235
cg17143643	chr1	111832267	F	CHIA	TSS1500	opensea	0.179967	0.0664467
cg11045792	chr15	52023699	F	LYSMD2	Body	opensea	-0.185708	0.0664512
cg03322057	chr1	172114419	R	DNM3	Body	opensea	0.124667	0.0667969
cg11745444	chr14	62216830	F	NA	IGR	shore	-0.205204	0.0667969
cg22050877	chr11	66510867	R	C11orf80	TSS1500	shore	-0.153031	0.0667969
cg14482038	chr2	12855168	R	NA	IGR	shore	0.151107	0.0669918
cg01283887	chr10	69366755	R	CTNNA3	Body	opensea	0.107519	0.0671044
cg15729404	chr6	133561614	R	EYA4	TSS1500	shore	-0.256195	0.0671044
cg10302002	chr15	81343342	F	NA	IGR	opensea	-0.157008	0.0671044
cg07435215	chr15	41575421	R	LOC729082	TSS1500	shore	-0.185748	0.0671082
cg18617819	chr16	69928821	R	WWP2	Body	opensea	-0.180958	0.0671082
cg08036259	chr1	169081528	R	ATP1B1	Body	opensea	-0.145734	0.0671431
cg15522161	chr15	83377743	F	AP3B2	Body	shore	-0.157019	0.0672071
cg16831931	chr3	66310357	R	SLC25A26	Body	opensea	-0.117986	0.0672071
cg07870914	chr1	47915951	F	NA	IGR	island	-0.232668	0.0674275
cg07455790	chr6	31650735	R	NA	IGR	island	-0.137517	0.0675428
cg02584377	chr12	122489545	F	BCL7A	Body	opensea	-0.153487	0.0675865
cg20504835	chr2	219843452	F	NA	IGR	shelf	-0.104251	0.0675865
cg10692341	chr3	38030079	R	NA	IGR	opensea	-0.106048	0.0677411
cg07312537	chr5	159789052	R	C1QTNF2	Body	opensea	-0.104146	0.0678307
cg01134662	chr17	39165631	R	KRTAP3-1	TSS1500	opensea	-0.174812	0.0679619
cg13171761	chr12	2782356	R	CACNA1C-AS2	TSS1500	opensea	-0.121036	0.0679619
cg02419401	chr5	35026569	R	AGXT2	Body	opensea	-0.177131	0.067985
cg03005362	chr10	77036584	F	NA	IGR	opensea	-0.153325	0.0681716
cg24883607	chr7	609506	F	PRKAR1B	Body	shore	-0.132238	0.0683618
cg24088508	chr1	38156462	R	C1orf109	TSS1500	shore	0.114863	0.0684339
cg21147063	chr21	34354927	R	NA	IGR	shelf	0.138421	0.0684507
cg11809107	chr2	3826782	R	NA	IGR	opensea	0.13656	0.0684871
cg06392753	chr2	102783282	F	IL1R1	Body	opensea	-0.146062	0.0686665
cg16689426	chr9	136822078	R	VAV2	Body	opensea	-0.103645	0.0686665
cg27156730	chr22	43302367	R	PACSIN2	Body	opensea	-0.135102	0.0687043
cg22535089	chr13	114184462	R	TMCO3	Body	shore	-0.114423	0.0687043
cg09672752	chr13	111783029	F	ARHGEF7	Body	opensea	-0.103625	0.0687043
cg08946068	chr6	169560226	R	NA	IGR	opensea	-0.101916	0.0687043
cg23066280	chr7	158032496	F	PTPRN2	Body	opensea	0.137637	0.0687151
cg13122607	chr15	63532360	F	RAB8B	Body	opensea	-0.122429	0.0687151
cg16221764	chr6	168309280	F	MLLT4	Body	opensea	-0.174454	0.0687331
cg13417301	chr11	117068863	R	LOC100652768	Body	opensea	-0.137023	0.0687418
cg08791424	chr2	208795653	F	PLEKHM3	Body	island	-0.174638	0.0688247
cg23314826	chr8	102450991	R	NA	IGR	opensea	-0.122719	0.0688542
cg14532664	chr9	16832274	F	BNC2	Body	shelf	0.119812	0.068968
cg22477343	chr20	39312069	R	NA	IGR	island	-0.223419	0.068968
cg08635064	chr7	42273390	R	GLI3	5'UTR	shelf	0.196019	0.0689986
cg13433729	chr6	159231891	R	EZR	Body	opensea	-0.166148	0.0689986
cg08724770	chr15	59564546	F	MYO1E	Body	opensea	-0.135417	0.0689986
cg04339360	chr13	73635568	F	KLF5	Body	shore	-0.190571	0.0690243
cg14036109	chr7	154744818	F	PAXIP1	Body	opensea	-0.154944	0.069034
cg26035201	chr7	1607146	F	PSMG3	3'UTR	shelf	0.196713	0.0690714
cg09939591	chr12	2527956	F	CACNA1C	Body	opensea	-0.142177	0.0690714
cg17495123	chr11	7242094	R	NA	IGR	opensea	0.109794	0.0691348
cg16048100	chr5	132609425	R	FSTL4	Body	opensea	0.200033	0.0691348
cg21913261	chr20	46214349	R	NCOA3	5'UTR	opensea	-0.183038	0.0691944
cg11693845	chr9	139418479	F	NOTCH1	Body	shore	-0.122834	0.0692792
cg14243843	chr2	233657923	F	GIGYF2	Body	opensea	-0.103822	0.069282
cg12105190	chr6	30653407	R	KIAA1949	Body	shore	0.156225	0.0692978
cg15936068	chr6	74104877	R	DDX43	1stExon	island	-0.17636	0.0692978
cg09678326	chr15	55541293	F	RAB27A	5'UTR	opensea	-0.155988	0.0692978
cg00409842	chr15	86076110	R	AKAP13	Body	opensea	-0.150321	0.0692978
cg00792187	chr12	50498041	F	GPD1	Body	opensea	-0.129729	0.0692978
cg04092003	chr1	9309889	R	H6PD	Body	opensea	-0.157073	0.069472
cg14140599	chr17	79418194	F	MIR3186	Body	shore	-0.114088	0.0695365
cg14082097	chr8	28573503	R	EXTL3	5'UTR	shore	-0.122921	0.0695683
cg15726154	chr3	157817678	R	SHOX2	Body	shore	-0.188648	0.0695762
cg02290163	chr2	178036284	R	NA	IGR	opensea	-0.176401	0.0695762
cg22512861	chr5	133334294	F	VDAC1	Body	opensea	-0.135049	0.0695762
cg19116601	chr5	79438459	R	SERINC5	3'UTR	opensea	-0.117228	0.0695762
cg18753994	chr6	19416025	R	NA	IGR	opensea	0.109995	0.0696665
cg25120326	chr3	13591084	F	FBLN2	5'UTR	shore	0.23723	0.0696665
cg23806751	chr3	46989655	F	CCDC12	Body	opensea	-0.168322	0.0696665
cg19245498	chr1	59884012	F	FGGY	Body	opensea	-0.126897	0.0696665
cg18480906	chr5	14014169	F	NA	IGR	shelf	-0.126757	0.0696665
cg10704177	chr1	62209607	F	INADL	5'UTR	shore	-0.120832	0.0696665
cg20718434	chr7	1748597	R	ELFN1	TSS200	opensea	-0.142351	0.0697994
cg16968885	chr1	103574619	R	COL11A1	TSS1500	opensea	-0.182536	0.0698467
cg20755362	chr13	24072145	F	NA	IGR	opensea	-0.109633	0.0698467
cg09576209	chr12	2339614	F	CACNA1C	Body	island	-0.170588	0.0698872
cg24002541	chr10	50649795	F	NA	IGR	opensea	-0.142519	0.0698872
cg26796825	chr22	20861479	F	MED15	TSS1500	shore	-0.126716	0.0698872
cg18494507	chr7	28548899	R	CREB5	Body	opensea	0.208844	0.06994
cg01957732	chr6	133561716	R	EYA4	TSS1500	shore	-0.237494	0.070024
cg02332500	chr5	60459327	R	C5orf43	TSS1500	shore	-0.101635	0.0700343
cg25432941	chr6	114194192	R	LINC01268	Body	opensea	-0.114696	0.0700346
cg19777557	chr20	46067411	F	NA	IGR	opensea	-0.12509	0.0701667
cg06626052	chr19	4375897	R	SH3GL1	Body	shelf	0.103169	0.0702384
cg17928960	chr4	7807921	R	AFAP1	Body	opensea	-0.191341	0.0702384
cg21679753	chr21	40338206	R	NA	IGR	opensea	-0.16558	0.0702384
cg12102573	chr17	27924969	F	ANKRD13B	Body	shelf	0.177454	0.0702843
cg12460175	chr22	18268062	R	NA	IGR	island	-0.122138	0.0702843
cg01558645	chr4	71587904	F	RUFY3	1stExon	opensea	0.134517	0.0704194
cg03393769	chr2	54611906	F	NA	IGR	opensea	-0.149458	0.0704311
cg21833076	chr11	104643591	F	NA	IGR	opensea	0.113018	0.0704972
cg27281690	chr2	7171963	F	RNF144A	Body	shore	-0.138584	0.0704972
cg02711479	chr1	36849024	F	STK40	5'UTR	shelf	-0.119238	0.0705046
cg00193695	chr18	76186879	R	NA	IGR	shelf	0.116503	0.070583
cg12902206	chr3	52351487	F	DNAH1	5'UTR	opensea	-0.205507	0.070583
cg06430495	chr10	14598044	F	FAM107B	5'UTR	opensea	-0.145966	0.070583
cg12873903	chr17	40514805	F	STAT3	5'UTR	opensea	-0.143865	0.070583
cg08573315	chr2	62797901	F	NA	IGR	opensea	-0.141697	0.070583
cg05131266	chr14	91591888	F	C14orf159	5'UTR	opensea	-0.134592	0.070583
cg05171937	chr12	27396765	R	STK38L	TSS1500	shore	-0.128813	0.070583
cg12511021	chr14	103157425	R	RCOR1	Body	opensea	-0.119371	0.070583
cg06464468	chr11	65414413	F	SIPA1	Body	island	-0.115877	0.0705835
cg23565609	chr17	79800926	F	NA	IGR	shore	-0.103095	0.0705835
cg14607574	chr18	55984581	R	NEDD4L	Body	opensea	-0.125426	0.0708555
cg01876453	chr6	133429668	F	NA	IGR	opensea	0.178811	0.0709241
cg18693051	chr19	1161800	R	SBNO2	5'UTR	shore	-0.143192	0.0709241
cg13609939	chr10	126105160	R	OAT	5'UTR	shore	-0.110324	0.070945
cg03046233	chr2	136777709	R	NA	IGR	opensea	-0.166527	0.0710659
cg21976145	chr20	45989084	R	NA	IGR	opensea	-0.107827	0.0710659
cg27028202	chr6	166100316	F	NA	IGR	opensea	-0.181723	0.0711485
cg15422897	chr14	33178559	F	AKAP6	Body	opensea	0.147871	0.0711512
cg07252680	chr14	94857224	F	SERPINA1	TSS200	opensea	-0.124301	0.071282
cg02140020	chr12	2613914	R	CACNA1C	Body	opensea	-0.121371	0.071282
cg11640529	chr20	43180850	R	PKIG	5'UTR	opensea	-0.201391	0.071334
cg11323828	chr15	41230578	F	DLL4	3'UTR	shore	-0.105213	0.071334
cg27393704	chr7	73245566	R	CLDN4	1stExon	island	-0.102417	0.071334
cg20460986	chr15	62267098	R	VPS13C	Body	opensea	-0.189269	0.0713411
cg24536703	chr11	77183438	R	PAK1	5'UTR	shore	-0.129223	0.0716017
cg21289858	chr13	112990547	F	NA	IGR	opensea	0.112169	0.0716053
cg24689264	chr15	83255558	R	CPEB1	Body	opensea	-0.20167	0.0716381
cg03091413	chr8	42356068	R	SLC20A2	5'UTR	opensea	-0.189822	0.0716486
cg08333564	chr12	4387794	R	CCND2	Body	shelf	-0.163142	0.0716486
cg26539042	chr17	77029308	R	C1QTNF1	5'UTR	opensea	-0.124643	0.0716486
cg18194305	chr3	113160637	F	WDR52	TSS1500	island	-0.107603	0.0716486
cg12763430	chr10	2247630	F	NA	IGR	opensea	0.116688	0.0716713
cg26198495	chr16	53126132	F	CHD9	5'UTR	opensea	0.202507	0.0716713
cg07537739	chr18	53446528	R	NA	IGR	shore	-0.219936	0.0716713
cg26346210	chr8	98610507	F	NA	IGR	opensea	-0.192286	0.0716713
cg21935516	chr12	107381705	F	MTERF2	TSS1500	shore	-0.18083	0.0716713
cg06444155	chr15	58666559	R	NA	IGR	opensea	-0.14757	0.0716713
cg21050234	chr18	10726518	F	FAM38B	Body	island	-0.118071	0.0716713
cg10023454	chr1	180137918	R	QSOX1	Body	opensea	-0.123303	0.0716912
cg26080567	chr21	37536137	R	DOPEY2	TSS1500	opensea	-0.166733	0.0718924
cg02841571	chr6	169977833	F	WDR27	Body	island	-0.130583	0.071895
cg26929355	chr16	69962827	F	WWP2	Body	opensea	-0.120989	0.071895
cg05872432	chr16	23452944	F	COG7	Body	opensea	-0.112717	0.0719712
cg07869283	chr3	71593693	F	FOXP1	TSS1500	opensea	-0.135005	0.0720839
cg19135835	chr4	159745108	F	FNIP2	Body	opensea	-0.100027	0.0720839
cg03545643	chr8	43554101	R	NA	IGR	opensea	0.147055	0.0720981
cg22288769	chr9	35519138	R	RUSC2	5'UTR	opensea	-0.162505	0.0720981
cg23076878	chr12	2737273	F	CACNA1C	Body	opensea	-0.151627	0.0720981
cg24166178	chr2	199240043	F	NA	IGR	opensea	-0.153691	0.0721333
cg22992279	chr4	26414901	R	RBPJ	Body	opensea	-0.138506	0.0721673
cg11298520	chr14	100741781	R	YY1	Body	opensea	-0.186448	0.072299
cg06036380	chr9	35569742	F	NA	IGR	opensea	-0.117296	0.0723167
cg01378158	chr16	67312308	R	PLEKHG4	TSS1500	shore	0.127534	0.0723184
cg11544657	chr1	9968130	R	CTNNBIP1	5'UTR	shore	-0.102556	0.0723315
cg21943421	chr20	35038534	R	DLGAP4	5'UTR	opensea	-0.184235	0.0723966
cg01355407	chr5	102117717	R	NA	IGR	opensea	-0.173832	0.0723966
cg11965692	chr1	202301587	F	UBE2T	Body	opensea	-0.162712	0.0723966
cg12146232	chr2	231854635	F	NA	IGR	shore	-0.117471	0.0723966
cg09785991	chr1	86934365	R	CLCA1	TSS200	opensea	-0.174076	0.072532
cg18558108	chr8	131439096	R	NA	IGR	opensea	-0.111351	0.0726464
cg23876214	chr18	57243921	R	CCBE1	Body	opensea	-0.259661	0.0726845
cg21437028	chr3	157816403	R	SHOX2	Body	shore	-0.193457	0.0726845
cg16344975	chr11	46268969	R	NA	IGR	shelf	-0.158601	0.0726845
cg14209576	chr1	44087631	F	PTPRF	Body	opensea	-0.115743	0.0727115
cg19513582	chr7	129481640	R	UBE2H	Body	opensea	-0.110017	0.0729349
cg12161971	chr11	77907332	R	USP35	Body	island	-0.147602	0.0729981
cg23028841	chr6	65214835	F	EYS	Body	opensea	-0.151184	0.0730707
cg13623101	chr5	32325489	F	NA	IGR	opensea	-0.149153	0.0731238
cg10406696	chr16	49672617	R	ZNF423	Body	island	-0.140871	0.0731238
cg11505048	chr1	183622726	R	RGL1	5'UTR	opensea	-0.112718	0.0731238
cg16006418	chr3	107403385	F	BBX	5'UTR	opensea	-0.104745	0.0731238
cg14195119	chr12	109316118	R	SVOP	Body	opensea	0.14142	0.0731403
cg05013000	chr10	105630597	R	NA	IGR	opensea	0.142905	0.0731582
cg00555816	chr13	113584082	R	NA	IGR	opensea	0.183398	0.073236
cg25206306	chr8	38415908	R	NA	IGR	opensea	-0.119193	0.0733069
cg00556627	chr2	201187003	F	SPATS2L	5'UTR	opensea	-0.120904	0.0735471
cg25984601	chr5	168271898	R	SLIT3	Body	opensea	-0.142425	0.0736038
cg05708536	chr1	113285118	F	NA	IGR	shore	-0.155753	0.0736638
cg26060802	chr10	114816714	F	TCF7L2	Body	opensea	0.157889	0.0736809
cg21126707	chr12	81111012	F	MYF5	1stExon	island	-0.170115	0.0736809
cg22550233	chr12	2782103	R	CACNA1C-AS2	TSS1500	opensea	-0.150788	0.0736809
cg17317029	chr7	91186339	F	NA	IGR	opensea	-0.149058	0.0736809
cg01795964	chr7	137532857	R	DGKI	TSS1500	shore	-0.145639	0.0736809
cg11674448	chr1	41711766	R	NA	IGR	shelf	-0.123441	0.0736809
cg02133819	chr2	106777939	R	UXS1	Body	opensea	-0.117412	0.0736809
cg17425561	chr7	772040	R	DNAAF5	Body	opensea	-0.113067	0.0736809
cg03019683	chr5	130928150	R	RAPGEF6	ExonBnd	opensea	-0.111311	0.0736809
cg15968529	chr13	76334325	F	LMO7	TSS1500	opensea	-0.147328	0.0737778
cg11732673	chr3	99782793	R	C3orf26	Body	opensea	-0.142339	0.0737778
cg11761627	chr5	62283805	R	NA	IGR	opensea	0.162682	0.0738692
cg01353522	chr12	899323	R	WNK1	Body	opensea	-0.129351	0.0738692
cg24718593	chr12	27924293	R	MANSC4	TSS200	opensea	-0.106687	0.0738692
cg11703759	chr1	31403193	R	NA	IGR	opensea	-0.102036	0.0738692
cg11575036	chr7	34096594	F	BMPER	Body	opensea	-0.149141	0.0738791
cg10671946	chr6	31740805	R	C6orf27	Body	opensea	-0.126973	0.0738791
cg20557603	chr12	68873953	F	NA	IGR	opensea	0.207985	0.073994
cg10148702	chr6	144076558	R	PHACTR2	Body	opensea	-0.220944	0.073994
cg23956648	chr3	185479235	R	IGF2BP2	Body	opensea	-0.17559	0.073994
cg09535475	chr2	42444827	F	EML4	Body	opensea	-0.150234	0.073994
cg06076517	chr21	38821804	F	DYRK1A	Body	opensea	-0.141295	0.073994
cg11880466	chr2	40588281	F	SLC8A1	Body	opensea	-0.112625	0.0740709
cg01623008	chr15	51115739	F	NA	IGR	opensea	-0.172862	0.0742094
cg10052840	chr19	4558119	R	SEMA6B	Body	shore	0.112978	0.0744016
cg15960407	chr19	47949624	F	SLC8A2	Body	shore	0.103668	0.0744949
cg07754131	chr14	25104653	R	GZMB	TSS1500	opensea	0.116793	0.0744949
cg16336494	chr6	151188259	F	MTHFD1L	Body	shore	0.118178	0.0744949
cg21991803	chr12	2613448	F	CACNA1C	Body	opensea	-0.105778	0.0745478
cg06642074	chr9	140193900	R	NA	IGR	shore	0.128526	0.0745563
cg13796110	chr15	65337510	R	OSTBETA	TSS200	opensea	-0.195366	0.0745589
cg02013904	chr16	73067772	F	ZFHX3	5'UTR	opensea	-0.18482	0.0745589
cg26984961	chr7	28458558	F	CREB5	5'UTR	opensea	-0.154072	0.0745589
cg08931923	chr3	129406072	R	TMCC1	Body	opensea	-0.132198	0.0745589
cg24948406	chr17	46608268	R	HOXB1	5'UTR	island	-0.13131	0.0745589
cg24028557	chr21	46864198	R	COL18A1	Body	shelf	-0.117817	0.0745589
cg05507444	chr1	15385943	R	KAZN	Body	opensea	-0.108405	0.0745589
cg19859756	chr6	17843786	F	KIF13A	Body	opensea	-0.135519	0.0745834
cg17418779	chr1	163131753	R	RGS5	ExonBnd	opensea	-0.118197	0.0746432
cg10239802	chr17	55184130	F	AKAP1	Body	opensea	-0.131484	0.0747339
cg01880929	chr2	36614588	F	CRIM1	Body	opensea	-0.148958	0.0748198
cg22429985	chr12	69345802	F	CPM	5'UTR	opensea	-0.141025	0.0749518
cg04236117	chr9	2234546	F	NA	IGR	opensea	-0.202693	0.0749645
cg13500072	chr1	36788387	R	FAM176B	Body	island	0.19849	0.0749833
cg07461239	chr18	8227929	R	PTPRM	Body	opensea	-0.163361	0.075019
cg09099627	chr7	155336167	F	NA	IGR	opensea	0.133662	0.0751663
cg19740341	chr8	20693391	R	NA	IGR	opensea	0.140142	0.0751663
cg03804240	chr11	118481350	R	PHLDB1	5'UTR	island	0.142068	0.0751663
cg18257796	chr3	65006801	R	NA	IGR	opensea	0.147673	0.0751663
cg14952495	chr19	34488570	F	NA	IGR	opensea	0.200536	0.0751663
cg19552640	chr5	126627061	R	MEGF10	5'UTR	shore	-0.245364	0.0751663
cg03447880	chr7	31121827	F	ADCYAP1R1	Body	opensea	-0.20179	0.0751663
cg03296248	chr13	110918516	F	COL4A1	Body	island	-0.188376	0.0751663
cg26085232	chr12	2204255	R	CACNA1C	Body	opensea	-0.171063	0.0751663
cg09107543	chr1	181053491	F	NA	IGR	opensea	-0.159185	0.0751663
cg26600434	chr6	160174574	F	WTAP	Body	opensea	-0.149751	0.0751663
cg15889573	chr3	9395290	F	NA	IGR	opensea	-0.149452	0.0751663
cg12425800	chr12	100592880	R	ACTR6	TSS1500	shore	-0.145738	0.0751663
cg13312846	chr4	141003946	F	MAML3	Body	opensea	-0.142523	0.0751663
cg07380563	chr15	89457241	F	MFGE8	TSS1500	shore	-0.13734	0.0751663
cg00114726	chr3	149319683	F	WWTR1	Body	opensea	-0.135996	0.0751663
cg23601597	chr20	47549925	R	ARFGEF2	Body	opensea	-0.134555	0.0751663
cg13908833	chr5	168271731	R	SLIT3	Body	opensea	-0.121888	0.0751663
cg23857426	chr2	110484609	F	NA	IGR	opensea	-0.118051	0.0751663
cg09196186	chr9	136010195	F	RALGDS	Body	opensea	-0.114487	0.0751663
cg10957755	chr19	48010261	F	NAPA	Body	opensea	-0.11077	0.0751663
cg08472738	chr21	32965774	F	NA	IGR	opensea	-0.109243	0.0751988
cg14847246	chr3	40158292	R	MYRIP	5'UTR	opensea	0.187507	0.0752458
cg10712491	chr7	1610757	R	PSMG3	TSS1500	shore	0.133762	0.0752467
cg01204128	chr8	6321629	R	MCPH1	Body	opensea	-0.151232	0.0753215
cg17037497	chr22	22696241	F	NA	IGR	opensea	0.117933	0.0753729
cg13946678	chr5	136482322	R	SPOCK1	Body	opensea	0.1563	0.0753729
cg15456603	chr1	204389417	R	NA	IGR	opensea	-0.109568	0.0753729
cg22007809	chr2	202278709	R	TRAK2	Body	opensea	-0.123617	0.0754129
cg00704359	chr14	73869495	R	NUMB	5'UTR	opensea	-0.137006	0.0754289
cg14324800	chr20	49345183	R	NA	IGR	shelf	-0.168805	0.0754726
cg04194947	chr2	177012191	R	NA	IGR	shore	-0.198913	0.0755958
cg06180425	chr12	66459032	F	NA	IGR	opensea	0.26209	0.0757052
cg11121007	chr10	72884784	R	NA	IGR	opensea	-0.124401	0.0757052
cg11495430	chr10	35195558	R	NA	IGR	opensea	-0.10792	0.0757052
cg08053480	chr18	53304507	F	TCF4	TSS1500	opensea	-0.122616	0.0757189
cg26351453	chr7	91685854	F	AKAP9	Body	opensea	-0.176642	0.0757448
cg26825108	chr20	49154929	F	PTPN1	5'UTR	opensea	-0.149115	0.0757448
cg00405942	chr2	208977726	F	NA	IGR	shore	-0.166752	0.0757943
cg24996161	chr5	140735397	F	PCDHGA2	Body	shore	-0.127802	0.0758027
cg19668696	chr17	80330835	F	UTS2R	TSS1500	shore	-0.18055	0.0758134
cg09742655	chr3	123410034	F	MYLK-AS2	Body	opensea	-0.150456	0.0758134
cg22633111	chr5	56989399	R	NA	IGR	opensea	-0.181217	0.0759407
cg25878149	chr2	150176814	R	NA	IGR	island	-0.135589	0.0759407
cg00555811	chr2	46523319	R	EPAS1	TSS1500	shore	-0.11521	0.0759461
cg08389300	chr10	120671241	R	NA	IGR	opensea	-0.137663	0.0760038
cg08327151	chr13	113435838	R	ATP11A	Body	opensea	-0.106914	0.0760038
cg13987922	chr5	96039870	F	CAST	5'UTR	shore	-0.247392	0.0761251
cg18179862	chr17	76381935	R	PGS1	Body	opensea	-0.169053	0.0762258
cg15559714	chr19	50808387	F	MYH14	Body	shelf	0.143258	0.076266
cg13613180	chr11	74560694	R	XRRA1	Body	opensea	0.24592	0.076266
cg23690739	chr2	230272902	F	DNER	Body	opensea	-0.149538	0.076266
cg07088817	chr3	69137735	F	ARL6IP5	Body	shelf	-0.125587	0.076266
cg11196848	chr8	16859833	R	FGF20	TSS200	shore	-0.167231	0.0762893
cg18487598	chr5	178735372	R	ADAMTS2	Body	opensea	-0.129103	0.0763958
cg00133403	chr16	57212731	F	FAM192A	5'UTR	opensea	-0.132251	0.0765178
cg20189318	chr7	87364903	F	RUNDC3B	Body	opensea	0.219674	0.0765988
cg10635895	chr12	2339439	R	CACNA1C	Body	island	-0.208791	0.0765988
cg26634219	chr17	46608277	R	HOXB1	TSS200	island	-0.160594	0.0766886
cg06122489	chr19	7813167	R	CD209	TSS1500	opensea	0.143375	0.0768572
cg22483170	chr11	120468195	F	GRIK4	5'UTR	opensea	0.150658	0.0768572
cg07765820	chr6	30973372	F	MUC22	TSS1500	opensea	-0.194074	0.0768572
cg07259711	chr4	87221920	F	MAPK10	5'UTR	opensea	-0.182788	0.0768572
cg21899520	chr18	71957896	R	CYB5A	Body	shore	-0.172157	0.0768572
cg16714503	chr14	24861984	F	NA	IGR	opensea	-0.137192	0.0768572
cg26945978	chr12	109214864	F	SSH1	Body	opensea	-0.12585	0.0768572
cg25943763	chr1	226884962	F	ITPKB	Body	opensea	0.162657	0.0768793
cg06776639	chr9	113590803	F	NA	IGR	opensea	0.19391	0.0768793
cg22294423	chr1	196435533	R	KCNT2	Body	opensea	0.195347	0.0768793
cg08291024	chr1	165324411	F	LMX1A	Body	island	-0.229983	0.0768793
cg08854467	chr2	178256760	R	AGPS	TSS1500	shore	-0.21762	0.0768793
cg00020799	chr12	94565092	R	PLXNC1	Body	opensea	-0.142327	0.0768793
cg02068351	chr6	132832336	R	STX7	5'UTR	shore	-0.12538	0.0768918
cg14777519	chr3	47890012	R	DHX30	Body	shore	-0.123225	0.0769344
cg27519373	chr19	57350292	F	PEG3	5'UTR	island	0.138905	0.0769394
cg00208830	chr1	183154778	F	LAMC2	TSS1500	opensea	-0.125558	0.0769394
cg17306339	chr12	124198578	F	ATP6V0A2	Body	shore	-0.108624	0.0769394
cg19839909	chr14	71113592	F	TTC9	Body	opensea	0.141737	0.0769978
cg13173077	chr2	145137967	R	NA	IGR	opensea	-0.136904	0.0769978
cg21506565	chr6	31691506	F	C6orf25	Body	island	-0.11901	0.0769978
cg03131219	chr3	119298105	R	ADPRH	TSS200	shore	-0.174528	0.0770352
cg24673875	chr4	188034964	F	NA	IGR	opensea	-0.103165	0.07708
cg08059118	chr4	6466959	F	PPP2R2C	Body	opensea	-0.112007	0.0770953
cg01723420	chr16	48593613	R	MIR5095	Body	opensea	-0.111494	0.0770953
cg20475082	chr2	129166686	R	NA	IGR	opensea	0.155496	0.0771123
cg20522180	chr1	212181447	R	INTS7	Body	opensea	-0.181667	0.0771123
cg10365886	chr6	32063874	F	TNXB	Body	island	-0.175103	0.0771123
cg26411530	chr13	34092719	F	STARD13	Body	opensea	-0.115036	0.0771123
cg13121780	chr6	39895423	R	MOCS1	1stExon	opensea	-0.1022	0.0771123
cg06457473	chr4	152147932	F	SH3D19	TSS1500	opensea	0.106662	0.0771192
cg04430161	chr7	73291344	R	NA	IGR	opensea	-0.102591	0.0772126
cg01175284	chr15	60995488	F	RORA	Body	opensea	-0.157879	0.0774732
cg17255375	chr16	19025910	R	TMC7	Body	opensea	-0.135866	0.0774732
cg21486510	chr2	7171998	F	RNF144A	Body	shore	-0.128523	0.0774732
cg07467772	chr1	201976917	F	NA	IGR	opensea	-0.103709	0.0774758
cg12482123	chr8	80802929	F	NA	IGR	shore	-0.21582	0.0774812
cg27481953	chr6	159240998	F	EZR-AS1	Body	shore	-0.130837	0.0775393
cg01559241	chr17	7681249	R	DNAH2	Body	opensea	-0.128224	0.0775393
cg23895554	chr6	626296	F	EXOC2	Body	opensea	-0.119582	0.077657
cg13190024	chr12	93918375	F	NA	IGR	opensea	-0.125731	0.0776984
cg00312125	chr4	84030111	R	PLAC8	5'UTR	shore	-0.117022	0.0777301
cg17735599	chr12	108078407	F	PWP1	TSS1500	shore	0.23126	0.0777634
cg04889043	chr10	93882845	F	CPEB3	Body	opensea	-0.164335	0.0777634
cg13529355	chr12	65049090	F	RASSF3	Body	opensea	-0.143289	0.0777634
cg15406502	chr4	26404251	R	RBPJ	Body	opensea	-0.121957	0.0777634
cg21366321	chr3	141168465	F	ZBTB38	3'UTR	opensea	-0.120562	0.0777634
cg07654202	chr8	28924133	R	NA	IGR	opensea	-0.145079	0.0778095
cg15369466	chr22	24124070	R	MMP11	Body	opensea	0.159652	0.0778189
cg20624429	chr11	122471331	F	NA	IGR	opensea	-0.12535	0.0778358
cg19734013	chr17	72104893	F	NA	IGR	opensea	0.173515	0.077915
cg04003883	chr2	37969786	R	NA	IGR	opensea	0.193167	0.077915
cg05697976	chr12	29376483	F	FAR2	TSS200	opensea	-0.208559	0.077915
cg20981515	chr5	149503227	F	PDGFRB	Body	opensea	-0.136002	0.0779474
cg01819759	chr13	79234251	F	RNF219	TSS1500	shore	0.129741	0.0780143
cg21966992	chr4	186787422	R	SORBS2	5'UTR	opensea	-0.158657	0.0780143
cg01835489	chr12	53299310	F	KRT8	TSS1500	shore	-0.149314	0.0780143
cg18095675	chr3	197272311	R	BDH1	Body	opensea	-0.140235	0.0780143
cg03778909	chr17	80833393	R	TBCD	Body	shelf	-0.119316	0.0780143
cg23002431	chr1	160278741	F	COPA	Body	opensea	-0.116885	0.0780143
cg13615367	chr3	58479231	F	KCTD6	5'UTR	shore	-0.113708	0.0780143
cg11029623	chr3	13611924	R	FBLN2	Body	island	-0.107113	0.0780539
cg19728741	chr14	105953457	R	CRIP1	5'UTR	island	0.127587	0.0780566
cg10799668	chr10	131631816	F	NA	IGR	opensea	-0.175934	0.0780566
cg24392753	chr2	174025831	F	ZAK	Body	opensea	-0.153906	0.0780566
cg26080153	chr20	30701083	R	TM9SF4	Body	opensea	-0.128669	0.0780566
cg10873032	chr8	30278708	F	RBPMS	Body	opensea	-0.118034	0.0780566
cg04075390	chr1	147080152	F	BCL9	5'UTR	opensea	-0.106043	0.0780566
cg01656750	chr16	57771195	R	KATNB1	Body	shore	-0.173247	0.0781332
cg10102023	chr20	51618225	R	TSHZ2	Body	opensea	-0.169375	0.0781332
cg02518591	chr4	73218282	F	ADAMTS3	Body	opensea	-0.16654	0.0781332
cg18408783	chr20	3218331	F	SLC4A11	1stExon	shore	-0.151452	0.0781332
cg20487757	chr17	73907374	F	FBF1	Body	shelf	-0.141973	0.0781332
cg27277859	chr19	51165632	R	SHANK1	Body	island	-0.137046	0.0781332
cg05475416	chr2	232256981	F	NA	IGR	shelf	-0.105995	0.0781332
cg23103501	chr2	122547664	F	NA	IGR	opensea	-0.101518	0.0781332
cg24908179	chr4	169190224	R	DDX60	Body	opensea	-0.116395	0.07814
cg05006323	chr21	38526326	F	TTC3	Body	opensea	-0.172207	0.0781621
cg23815853	chr12	48147034	F	RAPGEF3	Body	opensea	-0.145109	0.0781621
cg10161743	chr19	48917816	F	GRIN2D	Body	shore	-0.143384	0.0781621
cg08474576	chr2	36596122	R	CRIM1	Body	opensea	-0.131374	0.0781621
cg21408139	chr11	12277784	R	MICAL2	Body	opensea	-0.102589	0.0781621
cg14626497	chr5	10576723	F	ANKRD33B	Body	opensea	-0.108691	0.0781918
cg12998778	chr7	116181985	R	CAV1	Body	opensea	-0.123161	0.0782081
cg23656300	chr10	133871212	R	NA	IGR	opensea	0.116114	0.0783734
cg06511943	chr10	105650044	F	OBFC1	Body	opensea	-0.134162	0.0783734
cg13312247	chr12	27924484	R	MANSC4	TSS1500	opensea	-0.120841	0.0783734
cg23893460	chr15	72492422	R	PKM2	Body	shelf	-0.106581	0.0783734
cg24760467	chr10	102760784	F	LZTS2	5'UTR	shore	0.133409	0.0783866
cg03737199	chr2	3105346	R	LINC01250	Body	opensea	0.214823	0.0783866
cg06528771	chr2	102513985	F	NA	IGR	opensea	-0.108068	0.0783866
cg22345299	chr15	33009379	R	GREM1	TSS1500	shore	-0.296158	0.0784709
cg06750745	chr4	184181896	R	WWC2	Body	opensea	-0.14357	0.0784924
cg00573606	chr2	238322680	R	COL6A3	5'UTR	opensea	0.127204	0.0785154
cg17203647	chr8	25897201	R	EBF2	Body	island	-0.158175	0.0785764
cg01823172	chr6	144286167	F	PLAGL1	5'UTR	opensea	-0.134918	0.078618
cg16464328	chr17	42346923	F	SLC4A1	TSS1500	opensea	-0.177651	0.0786843
cg08192812	chr9	38023267	R	SHB	Body	opensea	-0.167891	0.0786843
cg18597421	chr21	27540728	R	APP	Body	shore	-0.144951	0.0786843
cg12128581	chr2	114720981	F	NA	IGR	opensea	-0.14443	0.0786843
cg04716225	chr19	39623670	F	PAK4	5'UTR	opensea	-0.122039	0.0786843
cg00419912	chr19	52068602	R	NA	IGR	opensea	0.132099	0.0787565
cg17967673	chr19	38040009	R	NA	IGR	island	-0.152456	0.0787721
cg07628717	chr7	4752018	R	FOXK1	Body	opensea	-0.123638	0.0788101
cg18530712	chr2	1700694	R	PXDN	Body	opensea	-0.102733	0.0788101
cg09829516	chr7	127524814	R	SND1	Body	opensea	-0.127442	0.0788907
cg08124399	chr6	74104868	R	DDX43	1stExon	island	-0.179723	0.0789032
cg18919333	chr5	125702052	R	GRAMD3	Body	opensea	-0.119397	0.0789032
cg17848615	chr15	51572136	F	CYP19A1	5'UTR	opensea	-0.107456	0.0789032
cg08463614	chr5	167067215	R	TENM2	Body	opensea	-0.100519	0.0789032
cg01632288	chr19	12880789	F	HOOK2	Body	island	-0.109914	0.0789397
cg24183381	chr5	3199752	F	NA	IGR	opensea	0.142352	0.0791639
cg12665414	chr5	173318755	F	CPEB4	Body	shelf	-0.204634	0.0791639
cg14747813	chr8	23848786	R	NA	IGR	opensea	0.152996	0.0795865
cg07597598	chr2	191564167	F	NA	IGR	opensea	-0.121935	0.0796126
cg21667531	chr12	18734369	R	PIK3C2G	Body	opensea	0.11487	0.0796867
cg08605965	chr21	46891839	R	COL18A1	Body	shore	0.145773	0.0796867
cg18128887	chr1	24861708	F	RCAN3	Body	island	-0.19344	0.0796867
cg05237553	chr5	40405674	R	NA	IGR	opensea	-0.146958	0.0796867
cg24226281	chr19	1862341	F	KLF16	Body	island	0.126216	0.0797171
cg17444299	chr3	112877046	F	LOC101929717	Body	opensea	0.169756	0.0797171
cg15387403	chr17	61553170	F	ACE	TSS1500	shore	-0.138727	0.0797663
cg07571536	chr1	178469666	F	NA	IGR	opensea	-0.12567	0.0797663
cg21351647	chr6	31081905	F	PSORS1C1	TSS1500	opensea	0.224338	0.0798016
cg24487308	chr22	31366629	R	TUG1	Body	shore	-0.164568	0.0798016
cg21462752	chr6	78160239	F	NA	IGR	opensea	-0.134254	0.0798016
cg24325030	chr2	36755803	F	CRIM1	Body	opensea	-0.122715	0.0798034
cg09735896	chr17	39019978	R	KRT12	Body	island	-0.112578	0.0798034
cg18080558	chr4	151502996	R	MAB21L2	TSS200	shore	-0.109173	0.0798034
cg03062944	chr10	6183455	F	NA	IGR	shelf	0.15944	0.0799313
cg03961112	chr11	57559256	R	CTNND1	Body	opensea	-0.127086	0.0799313
cg25582488	chr14	69095171	F	NA	IGR	island	-0.144596	0.0799377
cg05075112	chr2	29319945	R	CLIP4	TSS1500	opensea	-0.142978	0.0800379
cg25133951	chr1	178575267	F	NA	IGR	opensea	-0.142104	0.0800379
cg16027614	chr2	36729271	F	CRIM1	Body	opensea	-0.137526	0.0800379
cg02294631	chr19	50969614	R	NA	IGR	opensea	-0.119574	0.0800379
cg12721068	chr1	222695923	F	HHIPL2	3'UTR	opensea	-0.11502	0.0800379
cg05350291	chr1	181105236	F	NA	IGR	opensea	0.205295	0.0802078
cg22395490	chr4	77506779	F	SHROOM3	Body	shore	-0.164145	0.0802078
cg24562669	chr7	97807699	R	LMTK2	Body	opensea	-0.139736	0.0802078
cg08409953	chr3	130463629	F	PIK3R4	Body	shore	-0.126826	0.0802078
cg02033207	chr19	13257716	R	STX10	Body	shelf	0.113114	0.0803116
cg11986844	chr5	9624306	F	NA	IGR	opensea	-0.193483	0.0803116
cg18465945	chr17	17465682	R	PEMT	Body	shore	-0.131602	0.0803116
cg05290572	chr18	55923122	F	NEDD4L	5'UTR	island	-0.162666	0.0803658
cg25721143	chr8	51529695	R	SNTG1	Body	opensea	-0.142254	0.080395
cg12240392	chr17	74546948	R	NA	IGR	opensea	-0.186033	0.0804198
cg02059055	chr6	18390303	F	RNF144B	5'UTR	shelf	-0.164753	0.0804198
cg10904471	chr6	119580449	R	MAN1A1	Body	opensea	-0.149994	0.0804198
cg01489398	chr17	61574335	R	ACE	Body	opensea	-0.11192	0.0804198
cg24178440	chr3	149017298	R	NA	IGR	opensea	-0.109786	0.0804198
cg05740175	chr22	23592195	F	BCR	Body	opensea	-0.10594	0.0804198
cg04894644	chr12	2575300	F	CACNA1C	Body	opensea	-0.105282	0.0804503
cg13295320	chr18	60418085	F	PHLPP1	Body	opensea	-0.167554	0.0805984
cg16766632	chr12	57530100	R	LRP1	Body	opensea	0.172866	0.0806576
cg22912095	chr22	29281173	R	ZNRF3	5'UTR	shore	-0.181868	0.0806576
cg13597043	chr1	90165225	F	LRRC8C	Body	opensea	-0.161122	0.0806576
cg10228981	chr16	85283732	F	NA	IGR	opensea	-0.120765	0.0806576
cg22806334	chr2	160601171	F	2007-03-01	Body	opensea	-0.221695	0.0806823
cg04544196	chr8	52807648	F	PCMTD1	5'UTR	shelf	-0.17712	0.0806823
cg12142328	chr2	61691692	R	USP34	Body	opensea	-0.131251	0.0806891
cg07861448	chr8	72757787	R	MSC	TSS1500	shore	-0.276023	0.0808698
cg02515217	chr17	57918600	R	MIR21	TSS200	opensea	0.156591	0.0808815
cg11186047	chr10	103443077	R	FBXW4	Body	opensea	-0.130246	0.0808815
cg26344024	chr3	71357195	R	FOXP1	5'UTR	opensea	-0.114442	0.0808815
cg03267487	chr2	1668936	F	PXDN	Body	shore	-0.112799	0.0808815
cg12449837	chr22	31364356	F	TUG1	TSS1500	shore	-0.112523	0.0808815
cg19042804	chr3	57200443	R	IL17RD	TSS1500	shore	-0.106502	0.0808815
cg11706389	chr12	92859561	F	NA	IGR	opensea	-0.103712	0.0808815
cg25301756	chr4	1804106	R	FGFR3	Body	island	0.175605	0.0808885
cg25665970	chr10	127749102	F	ADAM12	Body	opensea	0.22028	0.0808885
cg03709892	chr1	19739396	R	CAPZB	Body	opensea	-0.15558	0.0808885
cg11051809	chr2	170370515	R	KLHL41	Body	opensea	-0.118203	0.0808885
cg01270975	chr9	130638627	R	AK1	5'UTR	shore	-0.100909	0.0808885
cg03353995	chr11	62455369	R	LRRN4CL	Body	island	-0.105866	0.080929
cg13481413	chr5	34044058	R	C1QTNF3	TSS1500	opensea	-0.111791	0.0809646
cg03353445	chr12	13043502	R	GPRC5A	TSS1500	shore	-0.198898	0.0810045
cg26276964	chr8	4147904	F	CSMD1	Body	opensea	0.110024	0.0810268
cg19541183	chr16	8346799	F	NA	IGR	opensea	0.112232	0.0810268
cg01309221	chr8	6786062	F	NA	IGR	opensea	0.140538	0.0810268
cg04108328	chr8	27634490	F	ESCO2	Body	shelf	0.146391	0.0810268
cg21942827	chr8	80638319	R	NA	IGR	opensea	-0.220581	0.0810268
cg02599587	chr5	153275285	R	NA	IGR	opensea	-0.177784	0.0810268
cg12152558	chr10	90402332	R	NA	IGR	opensea	-0.160693	0.0810268
cg19835618	chr16	67424855	F	TPPP3	Body	shelf	-0.125701	0.0810268
cg20406730	chr2	620840	F	NA	IGR	island	-0.123511	0.0810268
cg14338114	chr3	114215340	R	ZBTB20	5'UTR	opensea	-0.11441	0.0810268
cg14207785	chr10	17440426	R	ST8SIA6	Body	opensea	-0.114111	0.0810268
cg03670333	chr14	55849389	F	ATG14	Body	opensea	-0.1133	0.0810268
cg02487202	chr16	89358232	R	ANKRD11	Body	opensea	-0.100968	0.0810268
cg25567805	chr6	112572766	R	LAMA4	Body	shelf	0.132404	0.0811762
cg25212177	chr1	39653199	R	MACF1	Body	opensea	-0.134489	0.0811762
cg23677648	chr14	60387117	F	LRRC9	Body	shore	-0.130239	0.0811762
cg23927725	chr21	37499659	R	LOC100133286	TSS1500	shelf	-0.141502	0.0812927
cg05722741	chr6	168897588	F	SMOC2	Body	opensea	-0.112021	0.0815205
cg27658459	chr1	180129682	F	QSOX1	Body	opensea	-0.147802	0.081677
cg20599375	chr7	46919434	F	NA	IGR	opensea	-0.107053	0.081677
cg14369455	chr4	113300768	F	ALPK1	Body	island	-0.134415	0.0816875
cg13242379	chr7	116869499	F	ST7	Body	opensea	-0.11888	0.0816875
cg09868780	chr5	115299071	F	LVRN	Body	island	-0.215287	0.0817039
cg13689959	chr7	127456323	R	SND1	Body	opensea	-0.142042	0.0817624
cg18693985	chr5	173351052	R	CPEB4	Body	opensea	-0.190736	0.0818215
cg12367539	chr5	178956838	F	NA	IGR	shore	-0.137448	0.0818215
cg07394719	chr10	128192896	R	C10orf90	Body	shore	0.103162	0.0818228
cg16197751	chr8	15424279	F	TUSC3	Body	opensea	-0.116559	0.0818228
cg15717375	chr4	2465451	R	NA	IGR	shore	-0.1081	0.081896
cg11508123	chr6	129796679	R	LAMA2	Body	opensea	-0.153222	0.0820203
cg04036593	chr2	62797926	F	NA	IGR	opensea	-0.147918	0.0821481
cg19133948	chr12	76856664	F	OSBPL8	5'UTR	opensea	-0.132328	0.0821739
cg17476247	chr3	128085246	F	EEFSEC	Body	opensea	-0.142143	0.0822142
cg16780862	chr19	2346131	R	SPPL2B	Body	shore	-0.180921	0.0823772
cg02491003	chr3	57581393	R	ARF4	Body	shore	0.150622	0.0823833
cg01856754	chr14	94857074	F	SERPINA1	TSS200	opensea	-0.119191	0.0824464
cg13787933	chr3	141151009	F	ZBTB38	5'UTR	opensea	-0.143216	0.0824564
cg02599835	chr1	26361072	R	EXTL1	Body	shore	-0.120399	0.0824678
cg18570658	chr13	111100156	F	COL4A2	Body	opensea	-0.102994	0.0824685
cg07455685	chr19	45150513	F	PVR	Body	island	-0.15879	0.082494
cg01891738	chr1	27961772	F	FGR	TSS200	island	-0.142377	0.082494
cg09135529	chr11	62448703	F	NA	IGR	shelf	0.102211	0.0825794
cg03772015	chr7	155752787	R	NA	IGR	opensea	0.162865	0.0825794
cg09306362	chr14	55166004	F	SAMD4A	Body	opensea	-0.176136	0.0825794
cg10119211	chr2	101497487	F	NPAS2	5'UTR	opensea	-0.109128	0.0826163
cg19162768	chr15	96898476	R	NA	IGR	shore	0.137007	0.0826263
cg17727709	chr9	95299530	F	ECM2	TSS1500	opensea	-0.152389	0.0826263
cg17928208	chr13	98091617	F	RAP2A	Body	opensea	-0.146463	0.0826263
cg05565809	chr6	31740787	R	C6orf27	Body	opensea	-0.104335	0.0826263
cg08575141	chr20	54923208	F	NA	IGR	shelf	-0.168319	0.0826894
cg22993195	chr3	49756301	R	AMIGO3	1stExon	island	-0.20492	0.0826922
cg19303219	chr1	224769272	F	NA	IGR	opensea	-0.108764	0.0826922
cg08648138	chr1	92247732	R	TGFBR3	Body	opensea	0.187111	0.0827711
cg25715035	chr4	81951073	F	BMP3	TSS1500	shore	-0.138066	0.0827711
cg13767779	chr17	56031576	R	NA	IGR	shore	-0.103087	0.0827711
cg03889044	chr2	242802099	F	PDCD1	TSS1500	shelf	0.142643	0.0827841
cg12743968	chr19	7797169	R	CLEC4G	TSS200	shore	0.120248	0.0828918
cg08711067	chr7	140103737	R	RAB19	TSS200	opensea	-0.168288	0.0828918
cg15796818	chr2	1647197	F	PXDN	Body	opensea	-0.109317	0.0828918
cg17270821	chr10	134362758	R	INPP5A	Body	shore	-0.108305	0.0828918
cg04021014	chr22	49502115	F	NA	IGR	shelf	0.137214	0.0829024
cg16391425	chr12	91538036	F	NA	IGR	opensea	0.19861	0.0829503
cg12882730	chr10	11251269	R	CELF2	Body	opensea	-0.178759	0.0829503
cg03554671	chr7	5492828	R	NA	IGR	opensea	0.138964	0.0829754
cg25206919	chr16	31227812	F	TRIM72	Body	island	0.121231	0.0830228
cg11539674	chr7	127291444	R	SND1	TSS1500	shore	-0.261578	0.0830228
cg13487054	chr2	18061326	R	KCNS3	5'UTR	shore	-0.191682	0.0830228
cg10533069	chr14	31021011	R	NA	IGR	opensea	-0.188566	0.0830228
cg18221016	chr1	185934251	F	HMCN1	Body	opensea	-0.167367	0.0830228
cg00970753	chr8	27162686	R	TRIM35	Body	opensea	-0.111735	0.0830228
cg07040082	chr3	106285184	F	NA	IGR	opensea	-0.134439	0.083062
cg15538427	chr11	62457014	R	LRRN4CL	5'UTR	shore	0.102267	0.0834135
cg10245137	chr8	141657108	F	NA	IGR	opensea	0.268822	0.0834135
cg12946440	chr7	1753573	R	ELFN1	5'UTR	island	-0.156227	0.0835017
cg08925019	chr8	20079430	R	NA	IGR	opensea	-0.129477	0.0835067
cg14477708	chr13	98702639	F	NA	IGR	opensea	-0.10652	0.0835254
cg00898927	chr8	5367842	R	NA	IGR	opensea	0.130398	0.0835573
cg19610383	chr8	26485445	R	DPYSL2	Body	opensea	0.141508	0.0835573
cg16569373	chr16	3904593	R	CREBBP	Body	opensea	-0.134481	0.0835573
cg26278699	chr2	238322972	R	COL6A3	TSS200	opensea	0.112698	0.0835739
cg26089877	chr17	4498445	F	SMTNL2	Body	island	-0.181251	0.0835739
cg04346618	chr1	224908703	R	CNIH3	Body	opensea	-0.15276	0.0835739
cg13342684	chr15	37324866	F	MEIS2	Body	opensea	-0.154204	0.0836834
cg11944076	chr15	51997390	R	SCG3	Body	opensea	-0.124907	0.0836834
cg23455002	chr10	13388178	R	SEPHS1	5'UTR	opensea	0.102257	0.0837328
cg05087455	chr2	7171869	R	RNF144A	Body	shore	-0.132896	0.0837328
cg13984188	chr17	76176190	F	TK1	Body	opensea	-0.13542	0.0837459
cg06780634	chr4	119991548	F	NA	IGR	opensea	-0.114694	0.0837459
cg03871267	chr5	67483475	R	NA	IGR	opensea	-0.184505	0.0837527
cg13839829	chr7	57438732	R	NA	IGR	opensea	0.14459	0.0838637
cg10150530	chr12	25205468	F	LRMP	1stExon	opensea	-0.191653	0.0838637
cg26266427	chr6	32063838	F	TNXB	Body	island	-0.176989	0.0838637
cg11952493	chr10	28570835	F	MPP7	5'UTR	opensea	-0.164862	0.0838637
cg21146957	chr12	80838996	F	PTPRQ	Body	opensea	-0.157938	0.0838637
cg23915630	chr4	153383449	R	FBXW7	5'UTR	opensea	-0.156865	0.0838637
cg23692680	chr8	101445897	F	NA	IGR	opensea	-0.142991	0.0838637
cg01640003	chr11	75044897	F	ARRB1	Body	opensea	-0.128127	0.0838637
cg07296854	chr2	26696038	R	OTOF	Body	opensea	-0.122577	0.0838637
cg03990694	chr10	90671544	F	STAMBPL1	Body	opensea	-0.115194	0.0838637
cg21195173	chr1	20998598	R	KIF17	Body	opensea	-0.108902	0.0838637
cg17760794	chr10	73370347	F	CDH23	Body	opensea	-0.106411	0.0838637
cg06430061	chr5	75013592	R	C5orf37	TSS1500	shore	0.101378	0.0840281
cg21501207	chr1	162383000	F	SH2D1B	TSS1500	opensea	0.109286	0.0840281
cg01049462	chr19	39162015	R	ACTN4	Body	opensea	-0.167643	0.0840714
cg13462129	chr7	96651281	F	DLX5	Body	island	-0.236616	0.0841997
cg14460198	chr5	131763124	R	C5orf56	Body	opensea	-0.193636	0.0841997
cg24952525	chr2	28272460	F	BRE	Body	opensea	-0.134281	0.0842259
cg04874827	chr9	139615031	F	FAM69B	Body	shelf	0.102095	0.0842458
cg23344838	chr10	80517487	R	NA	IGR	opensea	0.116417	0.0842458
cg23456675	chr17	78902379	R	RPTOR	Body	opensea	-0.169018	0.0842458
cg08164776	chr14	93190992	F	LGMN	Body	opensea	-0.135	0.0842458
cg14415833	chr2	217150663	R	2004-03-01	Body	opensea	-0.128171	0.0842458
cg23791391	chr16	31140683	F	KAT8	Body	opensea	-0.102679	0.0842458
cg13227551	chr6	144011222	R	PHACTR2	Body	opensea	-0.176677	0.0842595
cg11704490	chr2	162284894	R	NA	IGR	shore	-0.109897	0.0842595
cg02652503	chr15	63287758	R	NA	IGR	opensea	0.214576	0.0842776
cg13750140	chr1	41688346	F	SCMH1	5'UTR	opensea	-0.147307	0.0843782
cg00859046	chr17	73455785	F	KIAA0195	5'UTR	shelf	-0.142002	0.0843782
cg09144037	chr5	86550451	F	NA	IGR	opensea	-0.123923	0.0844994
cg03964696	chr2	74734085	R	PCGF1	Body	shore	0.137886	0.0845024
cg23550826	chr4	55095282	F	PDGFRA	1stExon	shore	0.181723	0.0845825
cg04397857	chr9	35929916	F	NA	IGR	opensea	-0.110337	0.0845825
cg20791091	chr15	89052657	F	NA	IGR	opensea	-0.106637	0.0845825
cg23973274	chr1	155060172	R	NA	IGR	shelf	-0.108453	0.0847253
cg15745284	chr6	32064923	F	TNXB	Body	island	-0.202004	0.0847328
cg01558931	chr5	72676121	F	NA	IGR	island	-0.181655	0.0847328
cg08271705	chr11	43856828	F	HSD17B12	Body	opensea	-0.15283	0.0847328
cg25731959	chr1	1171952	R	NA	IGR	shore	-0.125846	0.0847328
cg18421540	chr3	55396908	R	NA	IGR	opensea	-0.111315	0.0847328
cg03302983	chr6	168231428	F	MLLT4	5'UTR	shelf	-0.110848	0.0847328
cg16611564	chr3	139589035	R	NA	IGR	opensea	0.111861	0.0847946
cg09634812	chr10	128613595	R	DOCK1	Body	opensea	0.133962	0.0847946
cg08196740	chr3	38195341	F	NA	IGR	opensea	-0.148486	0.0847946
cg06029801	chr14	50233674	F	KLHDC2	TSS1500	shore	-0.126203	0.0847946
cg12205358	chr1	95221354	F	LINC01057	Body	opensea	0.126447	0.0848139
cg11766619	chr1	150448887	F	RPRD2	3'UTR	opensea	-0.109902	0.084832
cg24890392	chr12	65721645	R	MSRB3	Body	opensea	0.207331	0.0848935
cg05919105	chr1	77533592	F	NA	IGR	opensea	0.161887	0.0849284
cg23517013	chr3	42544618	R	VIPR1	Body	shore	-0.164727	0.0849284
cg08092463	chr5	176526586	R	NA	IGR	opensea	-0.115018	0.0849284
cg24039870	chr5	1786730	R	NA	IGR	opensea	-0.108437	0.0849284
cg16894746	chr1	205602036	F	ELK4	TSS200	shore	-0.159427	0.0849691
cg00631557	chr3	52414088	F	DNAH1	Body	opensea	-0.122464	0.0849767
cg19133868	chr10	13717022	F	FRMD4A	Body	opensea	-0.134197	0.085018
cg19267163	chr6	125004984	F	NKAIN2	Body	opensea	0.212659	0.0850631
cg17229173	chr5	67483875	F	NA	IGR	opensea	-0.147812	0.0850631
cg16255583	chr6	72220122	F	NA	IGR	opensea	-0.168898	0.0850892
cg24048361	chr1	224776790	F	NA	IGR	opensea	-0.148909	0.0850892
cg22158248	chr12	112204136	R	ALDH2	TSS1500	shore	-0.143014	0.0850892
cg23773289	chr3	32537278	R	CMTM6	Body	opensea	-0.141227	0.0850892
cg13407262	chr7	54904270	F	NA	IGR	shelf	-0.106711	0.0850892
cg13337716	chr15	34015232	R	RYR3	Body	opensea	-0.101707	0.0850892
cg02124060	chr17	73676600	R	SAP30BP	Body	opensea	-0.114957	0.0851028
cg17868893	chr2	201217491	F	SPATS2L	5'UTR	opensea	-0.150941	0.0851455
cg07063463	chr20	43932925	R	MATN4	Body	island	-0.140183	0.0851854
cg19779002	chr11	60420897	F	LINC00301	Body	opensea	0.163818	0.0852609
cg07737773	chr2	113305097	R	POLR1B	5'UTR	opensea	-0.182592	0.0852609
cg07277108	chr2	62452250	F	NA	IGR	opensea	-0.147222	0.0852609
cg07684019	chr5	139174529	R	PSD2	TSS1500	shore	-0.123858	0.0852609
cg17809364	chr16	73195618	F	NA	IGR	opensea	-0.101639	0.0852609
cg26156699	chr18	57417334	R	NA	IGR	opensea	-0.15751	0.0853281
cg08132858	chr7	101361395	R	NA	IGR	opensea	0.140082	0.0853748
cg10848367	chr11	62009065	R	SCGB1D2	TSS1500	opensea	0.112202	0.0854369
cg23159233	chr22	46571660	F	PPARA	5'UTR	opensea	0.132629	0.0854369
cg15824303	chr10	23540223	R	NA	IGR	opensea	0.136919	0.0854369
cg27389290	chr2	196944767	F	NA	IGR	opensea	-0.133251	0.0854369
cg01818341	chr15	67440222	R	SMAD3	5'UTR	opensea	-0.11594	0.0854369
cg03187568	chr21	40202796	R	NA	IGR	opensea	-0.112375	0.0854369
cg26306643	chr4	28404459	R	NA	IGR	opensea	-0.123006	0.0854402
cg17105443	chr2	191906908	R	STAT4	Body	opensea	-0.11767	0.0855726
cg12036303	chr6	30652907	F	KIAA1949	Body	shore	0.145499	0.0856466
cg11267683	chr17	76501381	F	DNAH17	Body	shelf	-0.137133	0.0856466
cg21410595	chr17	42625246	R	NA	IGR	opensea	-0.124582	0.0856466
cg25161092	chr2	85638535	F	CAPG	TSS1500	shelf	-0.10229	0.0856466
cg04211829	chr16	72981203	R	ZFHX3	Body	opensea	-0.100528	0.0856466
cg18181593	chr1	92220012	F	TGFBR3	Body	opensea	0.118171	0.0857227
cg03830910	chr11	60468668	R	MS4A8	Body	opensea	-0.109597	0.0857227
cg02263703	chr2	46238685	R	PRKCE	Body	opensea	-0.133311	0.0857299
cg07356587	chr2	192734219	R	NA	IGR	opensea	-0.137947	0.0857699
cg17661756	chr9	10786455	R	NA	IGR	opensea	0.107524	0.0858568
cg14630685	chr12	57630931	F	NDUFA4L2	5'UTR	shore	0.112236	0.0858919
cg13038025	chr15	42130650	R	JMJD7-PLA2G4B	Body	opensea	-0.144349	0.0858975
cg04845466	chr2	27665079	F	KRTCAP3	TSS200	island	-0.123512	0.0858975
cg05477401	chr12	116505974	R	MED13L	Body	opensea	-0.181359	0.0859172
cg07351688	chr14	96727613	F	BDKRB1	5'UTR	opensea	-0.165317	0.0859172
cg07779430	chr21	39621740	F	KCNJ15	5'UTR	opensea	-0.146106	0.0859172
cg07338360	chr9	7011779	F	KDM4C	Body	opensea	-0.140158	0.0859172
cg08935841	chr1	219952602	F	NA	IGR	opensea	-0.107125	0.0859796
cg04920142	chr5	176173502	F	NA	IGR	shelf	-0.135431	0.08598
cg02690700	chr16	7054796	R	RBFOX1	5'UTR	opensea	0.10451	0.0860064
cg09338818	chr6	145373189	F	NA	IGR	opensea	-0.126943	0.0860064
cg09416959	chr4	120243311	R	FABP2	5'UTR	opensea	-0.134875	0.0861649
cg08843064	chr8	126619805	F	NA	IGR	opensea	-0.131184	0.0861973
cg25056837	chr12	118489272	F	WSB2	Body	opensea	-0.118543	0.086309
cg14262357	chr11	102444955	F	NA	IGR	opensea	0.130101	0.0863924
cg00225858	chr16	84223841	R	ADAD2	TSS1500	shore	-0.137925	0.0863924
cg23998165	chr2	238591696	F	LRRFIP1	Body	opensea	-0.200856	0.0864137
cg01702190	chr2	105561354	F	LOC102724691	Body	opensea	0.127024	0.0865273
cg13820738	chr13	109318058	R	MYO16	5'UTR	opensea	0.138539	0.0865522
cg13595655	chr15	41238325	F	NA	IGR	shelf	-0.11548	0.0865644
cg09125600	chr10	131404589	R	MGMT	Body	opensea	-0.213668	0.0865758
cg18561976	chr2	204801508	F	ICOS	5'UTR	opensea	-0.139636	0.0865922
cg05660308	chr18	56663935	F	NA	IGR	opensea	-0.138277	0.0868802
cg04001268	chr3	134215344	F	CEP63	Body	opensea	-0.119741	0.0868802
cg11969491	chr15	90735063	R	SEMA4B	5'UTR	opensea	-0.221107	0.086919
cg19535999	chr16	49677798	F	ZNF423	Body	opensea	0.153172	0.0869216
cg22432347	chr5	171368847	F	FBXW11	Body	opensea	-0.169655	0.0869216
cg01587424	chr8	142173149	F	DENND3	Body	opensea	-0.101432	0.0869216
cg01633282	chr1	95358601	F	SLC44A3	Body	opensea	-0.144503	0.0870119
cg22836291	chr22	31159151	F	OSBP2	TSS1500	opensea	-0.101712	0.0870119
cg21399843	chr11	11990319	F	DKK3	Body	opensea	0.184673	0.0871105
[truncated: 455 more rows]

## Sheet: S_Table_5
Supplementary Table S5. Over-represented KEGG categories identified using WebGestalt
Gene Set	Description	Size	Expect	Ratio	P Value	FDR
hsa04510	Focal adhesion	199	14.04	2.3504	2.8775e-06	0.00093806
hsa04520	Adherens junction	72	5.0799	3.1497	3.0287e-05	0.0045907
hsa04015	Rap1 signaling pathway	206	14.534	2.1329	4.2246e-05	0.0045907
hsa05200	Pathways in cancer	524	36.97	1.6229	9.4615e-05	0.0077111
hsa04512	ECM-receptor interaction	82	5.7854	2.7656	0.00015885	0.010357
hsa05206	MicroRNAs in cancer	150	10.583	2.1733	0.00030964	0.014752
hsa04024	cAMP signaling pathway	199	14.04	1.9943	0.00031676	0.014752
hsa04072	Phospholipase D signaling pathway	146	10.301	2.1357	0.00053253	0.019305
hsa04151	PI3K-Akt signaling pathway	354	24.976	1.6816	0.00053295	0.019305
hsa04014	Ras signaling pathway	232	16.369	1.8328	0.00083799	0.025468
hsa04810	Regulation of actin cytoskeleton	213	15.028	1.8632	0.00095717	0.025468
hsa05146	Amoebiasis	96	6.7732	2.3622	0.0010047	0.025468
hsa04020	Calcium signaling pathway	183	12.911	1.9363	0.0010156	0.025468
hsa04930	Type II diabetes mellitus	46	3.2455	3.0812	0.0011276	0.026256
hsa05205	Proteoglycans in cancer	198	13.97	1.8612	0.0014617	0.030544
hsa05165	Human papillomavirus infection	339	23.918	1.6306	0.0015082	0.030544
hsa04330	Notch signaling pathway	48	3.3866	2.9528	0.0015928	0.030544
hsa00533	Glycosaminoglycan biosynthesis	14	0.98776	5.062	0.00201	0.035176
hsa04670	Leukocyte transendothelial migration	112	7.9021	2.1513	0.0020501	0.035176
hsa00564	Glycerophospholipid metabolism	97	6.8438	2.1918	0.003064	0.048678
hsa00524	Neomycin, kanamycin and gentamicin biosynthesis	5	0.35277	8.5041	0.0031357	0.048678

## Sheet: S_Table_6
Supplementary Table S6. Over-represented Gene Ontology categories identified using WebGestalt
Gene Set	Description	Size	Expect	Ratio	P Value	FDR
GO:0043062	extracellular structure organization	400	28.095	1.9932	5.1839e-07	0.00035247
GO:1990778	protein localization to cell periphery	301	21.141	2.1285	1.1316e-06	0.00035247
GO:0034330	cell junction organization	285	20.018	2.1481	1.5251e-06	0.00035247
GO:0001525	angiogenesis	487	34.205	1.8418	1.6587e-06	0.00035247
GO:0007517	muscle organ development	380	26.69	1.9483	2.6299e-06	0.00044708
GO:0032409	regulation of transporter activity	247	17.349	2.1904	3.8276e-06	0.00054224
GO:0034765	regulation of ion transmembrane transport	441	30.975	1.8402	5.3304e-06	0.00064726
GO:0031589	cell-substrate adhesion	332	23.319	1.9727	7.0854e-06	0.00075283
GO:0001655	urogenital system development	326	22.897	1.9653	9.8038e-06	0.00092591
GO:0031032	actomyosin structure organization	184	12.924	2.3213	1.2435e-05	0.001057
GO:0051056	regulation of small GTPase mediated signal transduction	331	23.248	1.9356	1.4531e-05	0.0011228
GO:0007265	Ras protein signal transduction	437	30.694	1.7919	1.6939e-05	0.0011998
GO:0061564	axon development	490	34.416	1.7143	3.1796e-05	0.002079
GO:0198738	cell-cell signaling by wnt	459	32.239	1.737	3.4783e-05	0.0021118
GO:2000147	positive regulation of cell motility	493	34.627	1.7039	3.7981e-05	0.0021523
GO:0001570	vasculogenesis	75	5.2678	3.0373	5.187e-05	0.0027539
GO:0046486	glycerolipid metabolic process	456	32.028	1.7172	5.5911e-05	0.0027539
GO:0060537	muscle tissue development	371	26.058	1.8037	5.8318e-05	0.0027539
GO:0003013	circulatory system process	480	33.714	1.6907	6.364e-05	0.0028471
GO:0043087	regulation of GTPase activity	472	33.152	1.659	0.0001405	0.0059714
GO:0022604	regulation of cell morphogenesis	473	33.222	1.6555	0.00014847	0.0060096
GO:0090130	tissue migration	283	19.877	1.8614	0.00018417	0.007051
GO:0043112	receptor metabolic process	183	12.853	2.1006	0.00019079	0.007051
GO:0001667	ameboidal-type cell migration	381	26.76	1.719	0.00021707	0.0076877
GO:0006813	potassium ion transport	229	16.084	1.9273	0.00032392	0.010739
GO:0097485	neuron projection guidance	260	18.262	1.8618	0.00032919	0.010739
GO:0031532	actin cytoskeleton reorganization	96	6.7428	2.5212	0.00034112	0.010739
GO:0048009	insulin-like growth factor receptor signaling pathway	34	2.3881	3.7687	0.00042422	0.012687
GO:0010959	regulation of metal ion transport	360	25.285	1.7006	0.00043285	0.012687
GO:0061448	connective tissue development	265	18.613	1.8267	0.00046849	0.013274
GO:0051668	localization within membrane	146	10.255	2.1454	0.00053951	0.014715
GO:0001101	response to acid chemical	332	23.319	1.7154	0.00056924	0.014715
GO:0009896	positive regulation of catabolic process	409	28.727	1.6361	0.00057128	0.014715
GO:0051271	negative regulation of cellular component movement	301	21.141	1.7501	0.00061839	0.015343
GO:1905475	regulation of protein localization to membrane	177	12.432	2.0109	0.00063177	0.015343
GO:0098876	vesicle-mediated transport to the plasma membrane	93	6.532	2.4495	0.00070172	0.016568
GO:0006644	phospholipid metabolic process	470	33.011	1.5752	0.00072848	0.016735
GO:0035265	organ growth	170	11.94	2.01	0.00080897	0.017818
GO:0016311	dephosphorylation	461	32.379	1.5751	0.00081755	0.017818
GO:1903829	positive regulation of cellular protein localization	317	22.265	1.7067	0.00085047	0.018073
GO:0034764	positive regulation of transmembrane transport	191	13.415	1.9381	0.00087359	0.018111
GO:0010975	regulation of neuron projection development	475	33.363	1.5586	0.00092681	0.018371
GO:0061614	pri-miRNA transcription by RNA polymerase II	45	3.1607	3.1639	0.00092933	0.018371
GO:0006814	sodium ion transport	213	14.96	1.8716	0.00098173	0.018644
GO:0007163	establishment or maintenance of cell polarity	203	14.258	1.8937	0.0010034	0.018644
GO:0051235	maintenance of location	309	21.703	1.7048	0.001009	0.018644
GO:0014812	muscle cell migration	79	5.5487	2.5231	0.0010996	0.019887
GO:0048880	sensory system development	355	24.934	1.6443	0.0011337	0.020077
GO:0043270	positive regulation of ion transport	258	18.121	1.7659	0.0012052	0.020827
GO:0006022	aminoglycan metabolic process	165	11.589	1.9846	0.0012251	0.020827
GO:0060021	roof of mouth development	89	6.2511	2.3996	0.0012656	0.021094
GO:0045785	positive regulation of cell adhesion	392	27.533	1.5981	0.0013596	0.022224
GO:0044262	cellular carbohydrate metabolic process	271	19.034	1.7337	0.001392	0.022325
GO:0007215	glutamate receptor signaling pathway	90	6.3213	2.3729	0.0014223	0.022362
GO:0060348	bone development	208	14.609	1.8481	0.001447	0.022362
GO:0018209	peptidyl-serine modification	305	21.422	1.6805	0.0015125	0.022957
GO:0046683	response to organophosphorus	138	9.6927	2.0634	0.0015429	0.023008
GO:0032970	regulation of actin filament-based process	362	25.426	1.6125	0.0016463	0.02396
GO:0043171	peptide catabolic process	26	1.8262	3.8332	0.0016631	0.02396
GO:0007015	actin filament organization	388	27.252	1.5779	0.0019598	0.027764
GO:0038127	ERBB signaling pathway	141	9.9034	2.0195	0.0020072	0.027969
GO:0010171	body morphogenesis	50	3.5119	2.8475	0.0021747	0.029814
GO:0046777	protein autophosphorylation	225	15.803	1.7718	0.0022517	0.03038
GO:1901342	regulation of vasculature development	313	21.984	1.6375	0.0023656	0.031419
GO:0040013	negative regulation of locomotion	314	22.054	1.6323	0.002497	0.032654
GO:0007219	Notch signaling pathway	185	12.994	1.847	0.0026045	0.033543
GO:0042692	muscle cell differentiation	338	23.74	1.6007	0.0027173	0.034474
GO:0042476	odontogenesis	126	8.8499	2.0339	0.0030373	0.037966
GO:0048736	appendage development	177	12.432	1.8501	0.0030958	0.038137
GO:0003012	muscle system process	423	29.71	1.5146	0.0034436	0.041816
GO:0032147	activation of protein kinase activity	321	22.546	1.5967	0.0036053	0.043162
GO:0050878	regulation of body fluid levels	483	33.924	1.4739	0.0036836	0.043487
GO:0007272	ensheathment of neurons	119	8.3582	2.0339	0.0039068	0.045451
GO:0048705	skeletal system morphogenesis	234	16.435	1.7036	0.0039569	0.045451
GO:0038061	NIK/NF-kappaB signaling	120	8.4284	2.017	0.0042621	0.048303
GO:0019216	regulation of lipid metabolic process	382	26.831	1.5281	0.0043638	0.048509
GO:0033002	muscle cell proliferation	182	12.783	1.7992	0.0043944	0.048509
GO:0099601	regulation of neurotransmitter receptor activity	55	3.863	2.5886	0.0045057	0.049101
